# Supplementary material for: Degradable semiconducting polymers without long-range order for on-demand degradation of transient electronics
Source: Royal Society of Chemistry journal article supplement (doi:10.1039/d3tc03079b), 2023-01-01
Supplement: d3tc03079b1.pdf [file d3tc03079b1.pdf]

## Supplementary Information for

### Degradable semiconducting polymers without long-range order for on-demand degradation of transient electronics

Jerika A. Chiong,<sup>1,2</sup> Lukas Michalek,<sup>2</sup> Amnahir E. Peña-Alcántara,<sup>3</sup> Xiaozhou Ji,<sup>2</sup> Nathaniel J. Schuster,<sup>2</sup> and Zhenan Bao<sup>1,2,\*</sup>

<sup>1</sup>Dept. of Chemistry, Stanford University, Stanford, CA 94305, USA

<sup>2</sup>Dept. of Chemical Engineering, Stanford University, Stanford, CA 94305, USA

<sup>3</sup>Dept. of Materials Science and Engineering, Stanford University, Stanford, CA 94305, USA

#### Materials and Methods

##### Monomer and Polymer Synthesis and Characterization:

All starting materials and reagents were purchased and used without further purification. 1D NMR spectra were recorded on a Bruker Neo spectrometer (500 MHz) at 298 K. The spectra were internally referenced to the residual solvent signal (CDCl<sub>3</sub>:  $\delta$  7.26 for <sup>1</sup>H and  $\delta$  77.16 for <sup>13</sup>C; CD<sub>2</sub>Cl<sub>2</sub>:  $\delta$  5.32 for <sup>1</sup>H and  $\delta$  53.84 for <sup>13</sup>C; C<sub>2</sub>D<sub>2</sub>Cl<sub>4</sub>:  $\delta$  6.0 for <sup>1</sup>H; toluene-*d*<sub>8</sub>:  $\delta$  7.01 for <sup>1</sup>H; THF-*d*<sub>6</sub>:  $\delta$  1.72 and  $\delta$  3.58 for <sup>1</sup>H). Mass spectrometry (MS) of small molecules was carried out using electrospray ionization on a Waters Acquity LC/MS with SQD Quadrupole MS and H-Class UPLC, and matrix-assisted laser desorption/ionization-time of flight (MALDI-TOF) analysis was performed using Bruker Microflex MALDI-TOF instrument in reflectron mode. Number average molecular weight ( $M_n$ ), dispersity ( $D$ ), and number average degree of polymerization ( $DP_n$ ) were characterized by size exclusion chromatography (SEC) on the Tosoh High-temperature EcoSEC at 180 °C with 1,2,4-trichlorobenzene as the solvent. The system was equipped with a single TSK gel GPC column (GMH<sub>HR</sub>-HT2; 300 mm×7.8 mm) and was calibrated against monodisperse polystyrene standards.

##### DFT and TD-DFT Calculations:

The DFT and TD-DFT calculations were executed by Jaguar, version 13.3, release 2022-4, Schrödinger, Inc.<sup>1</sup> on the Sherlock computing cluster at Stanford University. In the DFT models, IDT units were replaced with thiophene units to simplify the calculations. Additionally, in the TD-DFT models, the alkyl chains on the IDT units were truncated to methyl groups to expedite the calculations. We modeled thiophene units with its sulfur atom oriented toward the hydrogens on the benzo group of the BT unit based on reported understanding of stabilizing non-covalent interactions between the two units.<sup>2,3</sup> The geometries of our DFT models were optimized without symmetry restrictions in the gas phase using the B3LYP-D3 functional and 6-31G\*\* basis set. For the modeled degradation products, the 20 lowest-energy singlet excited states were calculated in the gas phase using the CAM-B3LYP-D3 functional and 6-31G++\*\* basis set. The corresponding UV-vis absorption spectra were generated at the purely electronic level without vibronic character.

##### Thin Film Preparation:

Octadecyltrimethoxysilane (OTS)-modified Si and SiO<sub>2</sub> wafers were prepared by first subjecting the wafers to O<sub>2</sub> plasma at 50 W for 10 min and 3 min, respectively. A solution of OTS in anhydrous trichloroethylene (18  $\mu$ L OTS in 15 mL trichloroethylene) was syringe filtered, dropped

onto the wafers, and spincoated onto the wafers at 2000 rpm for 30 s after a 30 s wait. Wafers were left in a desiccator purged with  $\text{NH}_3$  overnight, proceeded by sonication in toluene for 15 min. In all thin film preparation, IDT-based polymers were dissolved at a concentration of 10 mg/mL in anhydrous chlorobenzene by stirring overnight on a hotplate at 70 °C. The DPP-based polymer reference was dissolved at a concentration of 5 mg/mL using the same method. Solutions were then raised to 80 °C an hour before spincoating, and then spincoated at various rpm for 60 s to achieve comparable film thicknesses and optimal electronic performance (pIDT-BTiBT: 1000/500 rpm/accel, 150 °C anneal; pIDT-10BTiPh: 1200/1000 rpm/accel, 150 °C anneal; pIDT-BTiPh: 2500/1000 rpm/accel, 80 °C anneal; pIDT-BT: 1200/1000 rpm/accel, 150 °C anneal; pDPP(C4E)-TIT: 1000/1000 rpm/accel, 200 °C anneal). All IDT films were thermally annealed for 30 min and were allowed to cool slowly to 50 °C after the hotplate was turned off. All processes were conducted in a glovebox under nitrogen.

### **Thin Film Characterization:**

UV-vis spectra were collected using an Agilent Cary 6000i spectrophotometer. PESA measurements were taken on a Riken AC-2 photoelectron spectrometer with a power setting of 5 nW and a power number of 0.5. Films were deposited on OTS-modified  $\text{SiO}_2$  substrates.

GIXD of polymeric thin films were performed at beamline 11-3 in the Stanford Synchrotron Radiation Light Source (SSRL) with a beam energy of 12.7 keV. All the measurements were collected in a helium-purged environment with an X-ray incident angle of 0.12°. Diffraction images were recorded with an exposure time of 120 s. Samples were fabricated by spincoating on OTS-modified Si substrates (Si was used to avoid background scattering from  $\text{SiO}_2$ ). Data was processed using Python code developed within the Bao group.

AFM images were taken in peak-force quantitative nanomechanical mapping (PF-QNM) mode on a Bruker Dimension Icon AFM. A NSC19 probe (from MikroMasch, Tallinn, Estonia with a nominal spring constant of 0.5 N/m, resonance frequency of 60 kHz, and a tip radius of 8 nm) was calibrated prior measurements on a hard sapphire sample resulting in a spring constant of 1.26 N/m. All nanomechanical images were recorded at a setpoint of ~700 pN with a Peak Force frequency of 2 kHz and amplitude of 150 nm. The scan resolution was set to 256x256 pixel with a scan-rate of 0.9 Hz. The data was evaluated and depicted with Gwyddion SPM software, which was also used to generate the histograms through a 1D statistical function to estimate the apparent DMT-modulus. Films were deposited on OTS-modified  $\text{SiO}_2$  substrates.

Optical microscope images for mechanical testing were taken on a Leica Microsystems DM4000 M LED Microscope. Contact angle images were taken with a Prosilica GC camera and analyzed using a First Ten Angstroms (FTA32) goniometer. Polymer film thicknesses were measured using a Bruker Dektak XT-A profilometer.

### **Device Fabrication:**

The edges of OTS-modified  $\text{SiO}_2$  wafers were etched with  $\text{O}_2$  plasma at 150 W for 20 s to remove OTS for spincoating. For bottom-gate top-contact (BGTC) devices, 40 nm Au source and drain contacts were thermally evaporated through a shadow mask ( $W = 1000 \mu\text{m}$ ,  $L = 50 \mu\text{m}$ ). For top-gate bottom-contact (TGBC) devices, 3/40 nm Cr/Au source and drain electrodes were thermally evaporated through a shadow mask ( $W = 2000 \mu\text{m}$ ,  $L = 50 \mu\text{m}$ ). Before spincoating of

semiconductors, OTS-SiO<sub>2</sub> substrates patterned with Au electrodes were soaked in isopropanol solution (20 mL) of pentafluorothiophenol (PFBT) (2.6 μL, 1:7700 v/v) for 10 min for electrode modification and then washed with isopropanol. Semiconductors were spincoated using the procedure detailed in thin film preparation. CYTOP dielectric (Asahi Glass, type CTL-809M) was prepared by mixing with CYTOP CT-SOLV180 (1:0.2 v/v CYTOP:CT-SOLV180) and spincoating to form ~700 nm dielectric layer and annealed at 80 °C for 1 h (pIDT-BTiPh) or 150 °C for 30 min (all other polymers). The 45 nm Au gate was also thermally evaporated using Kapton sheets as masks. All transistors were characterized using a Keithley 4200 semiconductor parameter analyzer in a glovebox under nitrogen atmosphere at room temperature. A gate-channel capacitance per unit area of 11.5 nF/cm<sup>2</sup> (for BGTC SiO<sub>2</sub> dielectric) or 2.6-2.9 nF/cm<sup>2</sup> (for TGBC CYTOP dielectric, calculated depending on CYTOP thickness) was used for determination of saturation mobilities. All transistor measurements were averaged from six total channels selected at random from two different substrates.

### UV-vis, GPC, NMR, and QCM Degradation Studies:

For UV-vis solution studies, 150x molar excess of TFA and DI H<sub>2</sub>O were added to polymer solution samples (~0.01 mg/mL). For chloroform solutions, chloroform stabilized with amylenes was used as the ethanol stabilizer reacted with TFA. Samples were left to degrade at room temperature. To quantify the degradation over time, absorbance (A) at λ<sub>max</sub> was calculated after normalizing over the allowed degradation range, where A<sub>λ<sub>max</sub>,final</sub> was subtracted from A<sub>λ<sub>max</sub>,initial</sub>.

The following equation 
$$Normalized A_{\lambda_{max}, i} = \frac{A_{\lambda_{max}, i} - A_{\lambda_{max}, f}}{A_{\lambda_{max}, 0} - A_{\lambda_{max}, f}}$$
 was used.

For UV-vis thin film studies, thin film samples were prepared by spincoating polymers onto OTS-SiO<sub>2</sub> substrates using the same processing conditions as detailed in thin film preparation. PDMS (Sylgard 184, 12:1 w/w base:crosslinker, 13 g total) was prepared by mixing for 3 min at 3000 rpm, pouring into a 150 mm x 15 mm petri dish, and curing overnight at 70 °C. PDMS stamps were used to peel off the polymer films and placed facing downwards into an acidic aqueous solution in water (3 mL) in a 20 mL scintillation vial with a Teflon cap. Vials were placed in a 70 °C oven to heat evenly.

GPC degradation studies were measured by size exclusion chromatography (SEC) at room temperature with HPLC THF as the solvent. The system was equipped with two PolyPore columns (Agilent) connected in series with a DAWN multiangle laser light scattering (MALLS) detector and an Optilab T-rEX differential refractometer (both from Wyatt Technology). 150x molar excess of TFA and DI H<sub>2</sub>O were added to polymer solution samples (~0.01 mg/mL). At each timepoint, solutions were evaporated to dryness and dried under high vacuum overnight. ~1 mg/mL solutions in HPLC THF were used to run on GPC.

In situ NMR degradation experiments were conducted at a higher concentration of polymer solution in THF (~5 mg/mL) using a 150x molar excess of deuterated TFA and D<sub>2</sub>O. NMR spectra were recorded on a Bruker Neo spectrometer (500 MHz) at 298 K.

QCM sensors were prepared by spincoating polymers onto QSense QSX 303 SiO<sub>2</sub> sensors using the same processing conditions as detailed in thin film preparation. QCM measurements were

performed using a Biolin Scientific QSense Explorer and flow module with 40  $\mu\text{L}$  volume above the sensor. For water swelling measurements, temperature was kept at 25  $^{\circ}\text{C}$ . For acid degradation experiments, temperature was kept at 65  $^{\circ}\text{C}$ . Each measurement was started by recording a stable baseline in air for > 30 min and subsequent flow of water or acid at a constant flow rate of 50  $\mu\text{L}/\text{min}$ .

## Synthesis of BT-derivative monomers

The synthetic schemes of the two degradable BT-derivative monomers *N*,1-bis(7-bromobenzo[*c*][1,2,5]thiadiazol-4-yl)methanimine (Br-BTiBT-Br) and 1-(7-bromobenzo[*c*][1,2,5]thiadiazol-4-yl)-*N*-(4-bromophenyl)methanimine (Br-BTiPh-Br) are shown below.

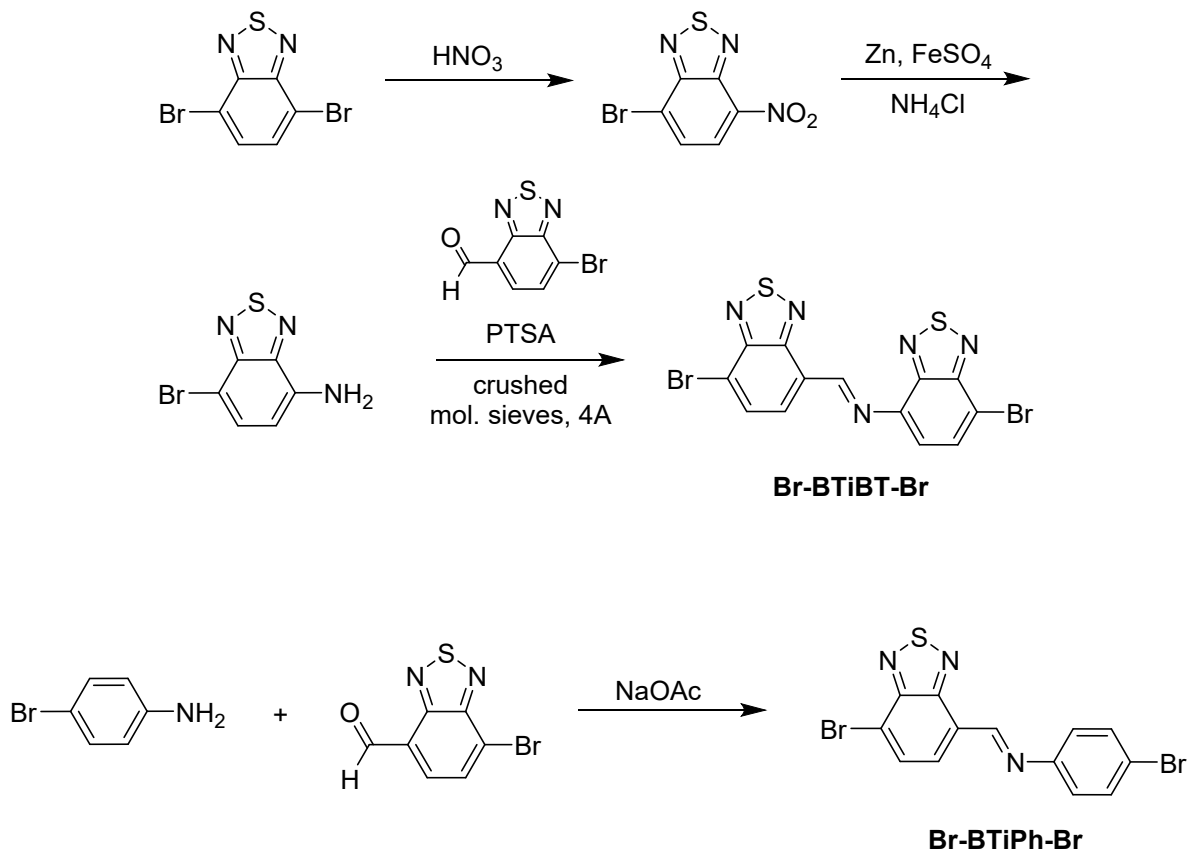

**Figure S1.** The preparation of Br-BTiBT-Br and Br-BTiPh-Br monomers.

## Synthesis of 4-bromo-7-nitrobenzo[*c*][1,2,5]thiadiazole

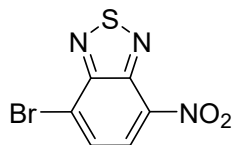

To a 250 mL round-bottom flask with stir bar, 4,7-dibromobenzo[*c*][1,2,5]thiadiazole (5.00 g, 17.0 mmol) and conc. nitric acid (80 mL) were added. The reaction was covered from light and refluxed for 5 h. The top joint of the condenser was connected by Teflon tubing to a flask containing 1 M NaOH for quenching of nitrogen oxide fumes. The reaction was cooled and then slowly poured into ice water (200 mL). The yellow precipitate that formed was filtered and washed well with H<sub>2</sub>O. The crude precipitate was dissolved in DCM and washed with H<sub>2</sub>O, sat. NaHCO<sub>3</sub>, and brine. The organic layer was dried over Na<sub>2</sub>SO<sub>4</sub> and dried *in vacuo*. The crude product was purified by silica column chromatography using 70% DCM in hexanes as the eluent. The final product was a pale-yellow solid. Yield: 2.20 g (50%).

<sup>1</sup>H NMR: (500 MHz, CDCl<sub>3</sub>) δ 8.47 (d, J = 8.1 Hz, 1H), 8.05 (d, J = 8.1 Hz, 1H).

<sup>13</sup>C NMR: (126 MHz, CDCl<sub>3</sub>) δ 154.79, 145.99, 139.14, 130.52, 127.85, 123.22.

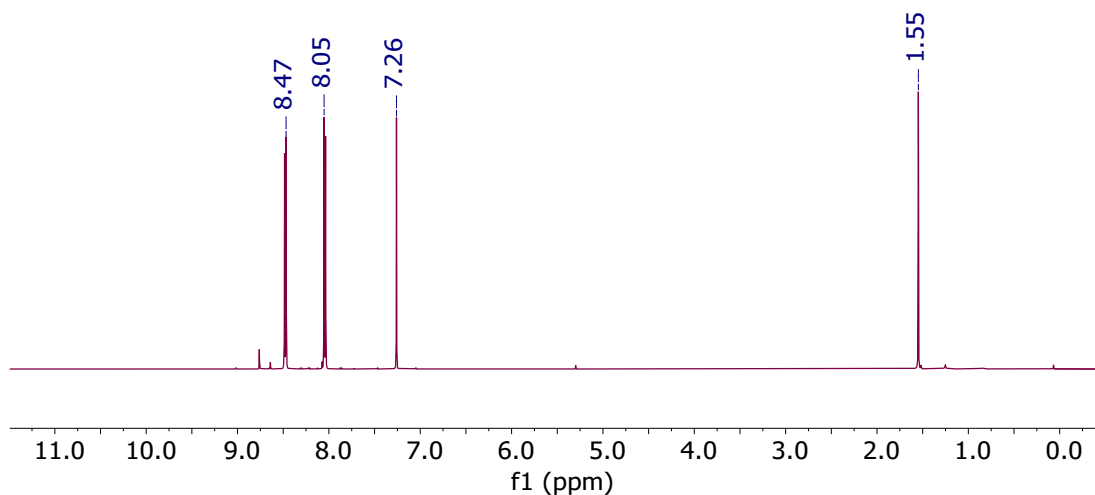

**Figure S2.** <sup>1</sup>H NMR spectra of 4-bromo-7-nitrobenzo[*c*][1,2,5]thiadiazole in CDCl<sub>3</sub>.

## Synthesis of 7-bromobenzo[*c*][1,2,5]thiadiazol-4-amine

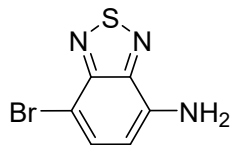

4-bromo-7-nitrobenzo[*c*][1,2,5]thiadiazole (1.90 g, 7.31 mmol, 1.0 equiv.) and EtOH (40 mL) were added to a 200 mL round-bottom flask with a stir bar. FeSO<sub>4</sub>·7H<sub>2</sub>O (6.09 g, 21.9 mmol, 3.0 equiv.), NH<sub>4</sub>Cl (3.13 g, 58.4 mmol, 8.0 equiv.), and H<sub>2</sub>O (7 mL) were added with efficient stirring. Then, Zn powder (1.43 g, 21.9 mmol, 3.0 equiv.) was added to the reaction mixture. The yellow suspension turned a brown-black color upon addition. The reaction mixture was heated at 55 °C for 3 h. After 3 h, the black mixture turned into an orange color. The reaction was cooled to room temperature and filtered over Celite. The precipitate on Celite was washed with EtOH (70 mL) and ethyl acetate (30 mL). The filtrate was concentrated *in vacuo* until a residue was formed. To the residue, ethyl acetate (80 mL) and 25% w/v NH<sub>4</sub>Cl aqueous solution (20 mL) were added. The biphasic mixture was shaken and then washed with H<sub>2</sub>O, sat. NaHCO<sub>3</sub>, and brine. The organic layer was dried over Na<sub>2</sub>SO<sub>4</sub> and dried *in vacuo*. The crude product was purified by silica column chromatography using 30% ethyl acetate in hexanes as the eluent. The final product was red-orange solid. Yield: 893 mg (53%)

<sup>1</sup>H NMR: (500 MHz, CDCl<sub>3</sub>) δ 7.57 (d, J = 7.7 Hz, 1H), 6.53 (d, J = 7.9 Hz, 1H), 4.71 (s, 2H).

<sup>13</sup>C NMR: (126 MHz, CDCl<sub>3</sub>) δ 153.67, 147.57, 138.68, 133.61, 107.43, 99.80.

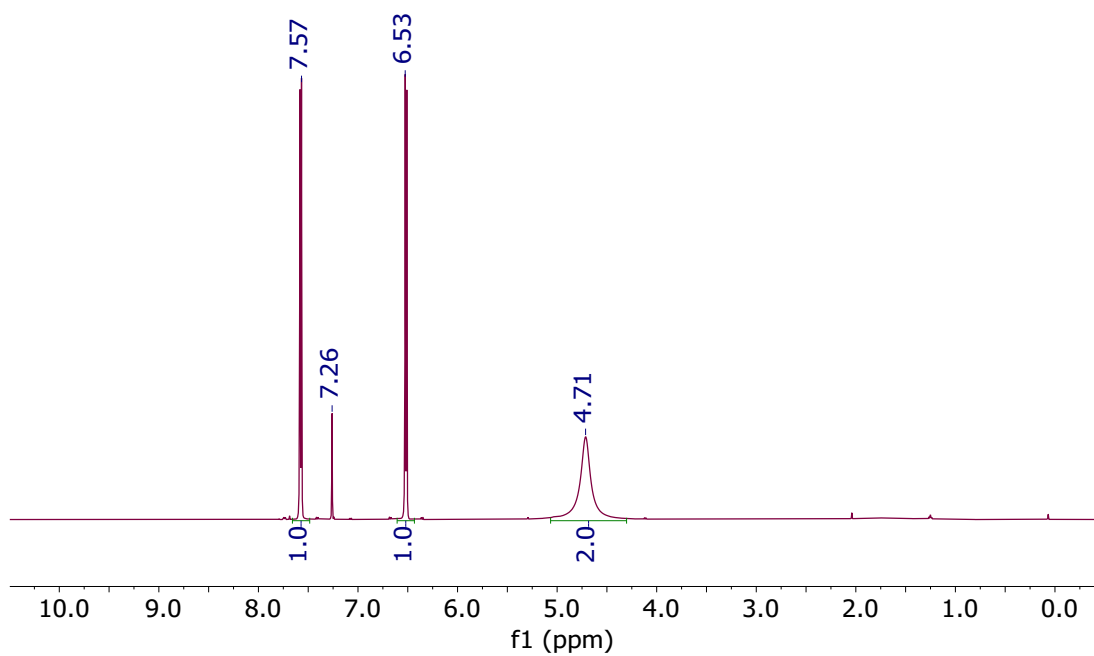

**Figure S3.** <sup>1</sup>H NMR spectra of 7-bromobenzo[*c*][1,2,5]thiadiazol-4-amine in CDCl<sub>3</sub>.

## Synthesis of *N*,1-bis(7-bromobenzo[*c*][1,2,5]thiadiazol-4-yl)methanimine (Br-BTiBT-Br)

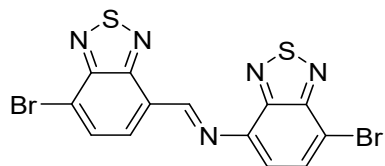

To an oven-dried 2-neck 50 mL round-bottom flask with a stir bar, 7-bromobenzo[*c*][1,2,5]thiadiazol-4-amine (400 mg, 1.74 mmol, 1.05 equiv.), 7-bromobenzo[*c*][1,2,5]thiadiazole-4-carbaldehyde (4.02 mg, 1.66 mmol, 1.0 equiv.), and PTSA monohydrate (15.7 mg, 82.8  $\mu\text{mol}$ , 0.05 equiv.) were added. The flask was attached to a reflux condenser, and crushed molecular sieves were added. Anhydrous toluene (20 mL) was added, and the reaction was refluxed overnight (16 h). The reaction was cooled to room temperature, and the precipitate was filtered and washed with chloroform. To separate the product from the molecular sieves, the mixture was dissolved in hot chloroform and filtered through a frit. The filtrate was dried *in vacuo*, washed with minimal room temperature chloroform and filtered again. The precipitate was dried *in vacuo*. The final product was a yellow-orange solid. Yield: 392 mg (52%).

$^1\text{H}$  NMR: (500 MHz,  $\text{CD}_2\text{Cl}_2$ )  $\delta$  9.97 (s, 1H), 8.46 (d,  $J = 7.7$  Hz, 1H), 8.08 (d,  $J = 7.6$  Hz, 1H), 7.93 (d,  $J = 7.7$  Hz, 1H), 7.40 (d,  $J = 7.7$  Hz, 1H).

$^{13}\text{C}$  NMR: (126 MHz,  $\text{CD}_2\text{Cl}_2$ )  $\delta$  159.25, 154.18, 154.06, 150.23, 149.98, 142.97, 133.97, 133.02, 132.75, 132.30, 128.80, 122.00, 111.88.

Calculated ( $M + \text{H}^+$ ): 455.83, measured ( $m/z$ ): 455.85.

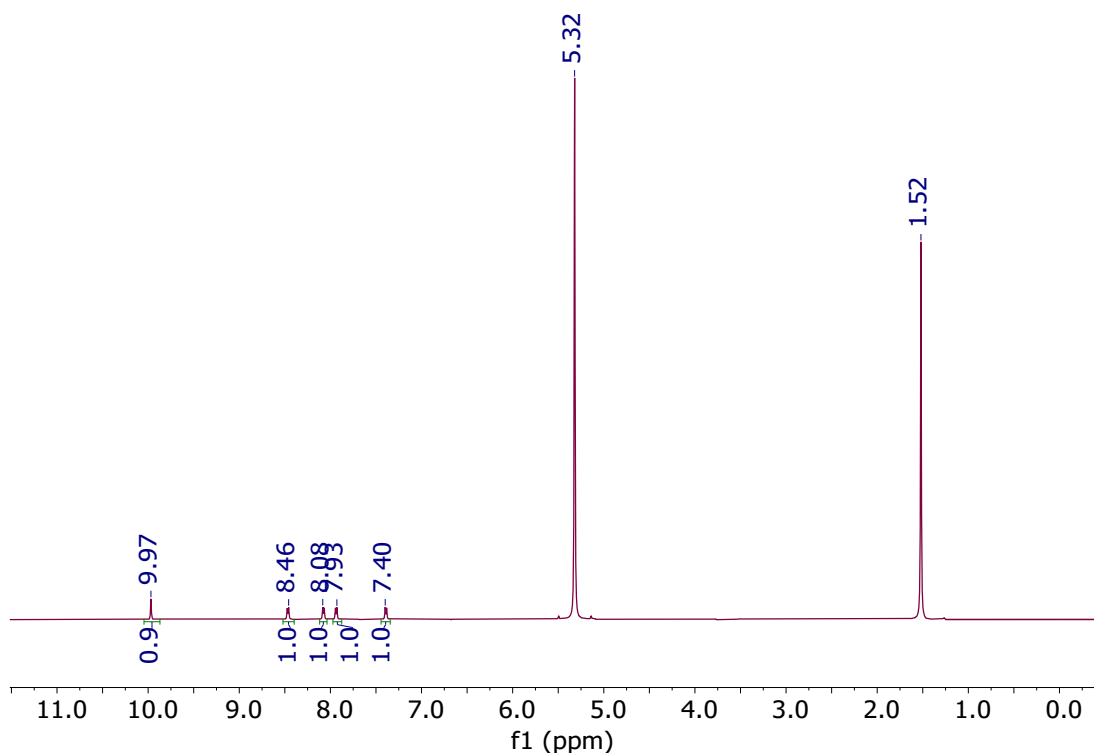

**Figure S4.**  $^1\text{H}$  NMR spectra of Br-BTiBT-Br in  $\text{CD}_2\text{Cl}_2$ .



## Synthesis of 1-(7-bromobenzo[*c*][1,2,5]thiadiazol-4-yl)-*N*-(4-bromophenyl)methanimine (Br-BTiPh-Br)

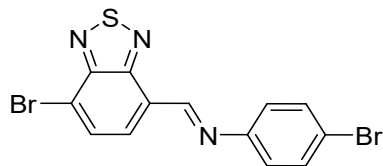

To a 50 mL round-bottom flask with stir bar, 7-bromobenzo[*c*][1,2,5]thiadiazole-4-carbaldehyde (300 mg, 1.23 mmol, 1.0 equiv.) and EtOH (200 proof, 15 mL) were added. Then, 4-bromoaniline (212 mg, 1.23 mmol, 1.0 equiv.) and sodium acetate (111 mg, 1.36 mmol, 1.1 equiv.) were added to the flask. The reaction was heated at 70 °C overnight (16 h). The reaction mixture was dried *in vacuo*. The crude product was extracted into chloroform, washed with H<sub>2</sub>O, and dried over Na<sub>2</sub>SO<sub>4</sub> and *in vacuo*. Then, the crude product was dissolved in minimal 1:1 chloroform:EtOH (200 proof) and heated until fully dissolved. The solution was left to cool to room temperature and slowly evaporate. After 3 h, precipitates of the starting material formed. The precipitate was filtered off, and the filtrate was dried *in vacuo*. The final product was yellow-orange solid. Yield: 400 mg (82%)

<sup>1</sup>H NMR: (500 MHz, CD<sub>2</sub>Cl<sub>2</sub>) δ 9.29 (s, 1H), 8.31 (d, J = 7.6 Hz, 1H), 8.03 (d, J = 7.7 Hz, 1H), 7.56 (d, J = 8.4 Hz, 2H), 7.25 (d, J = 8.4 Hz, 2H).

<sup>13</sup>C NMR: (126 MHz, CD<sub>2</sub>Cl<sub>2</sub>) δ 155.63, 154.09, 153.98, 150.96, 132.74, 132.68, 128.14, 123.31, 120.51, 117.87.

Calculated (M + H<sup>+</sup>): 397.87, measured (m/z): 397.83.

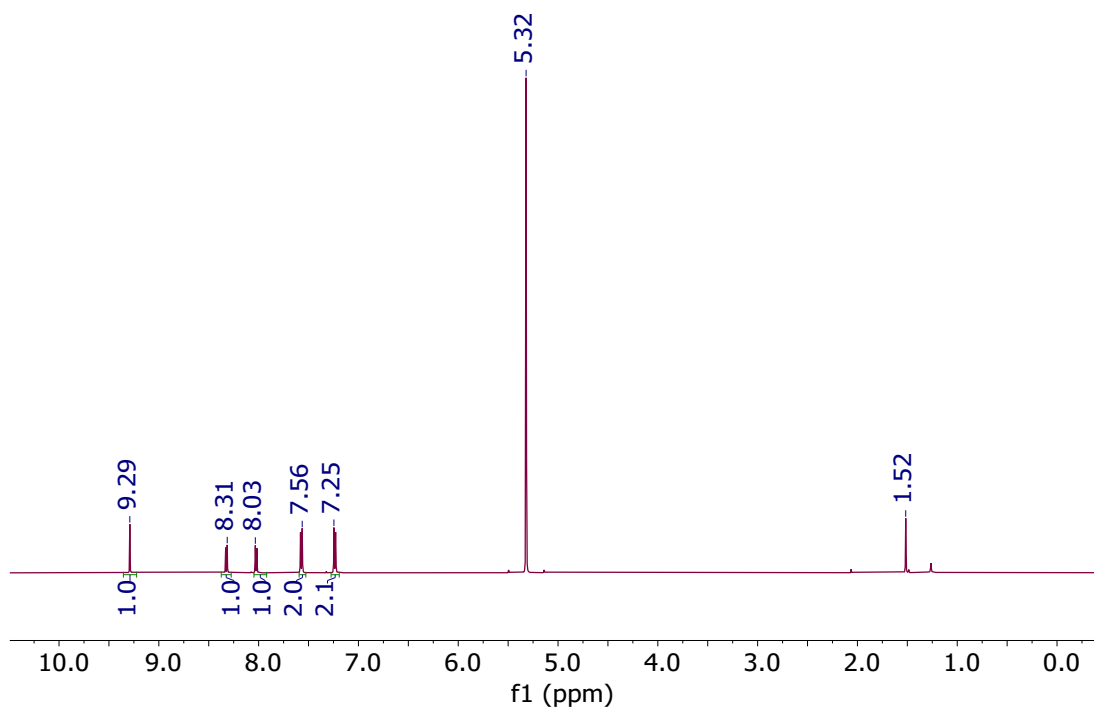

**Figure S5.**  $^1\text{H}$  NMR spectra of Br-BTiPh-Br in  $\text{CD}_2\text{Cl}_2$ .

### Synthesis of pIDT-BTiBT and pIDT-BTiPh semiconducting polymers

The IDT-based polymers were prepared using a similar procedure with XPhos Pd G3 as the catalyst.<sup>4</sup> Below, the preparations of pIDT-BTiBT and pIDT-BTiPh are detailed. pIDT-10BTiPh was prepared using the same procedure as for pIDT-BTiBT but with 0.91 equiv. of Br-BTiBT-Br and 0.1 equiv. of Br-BTiPh-Br.

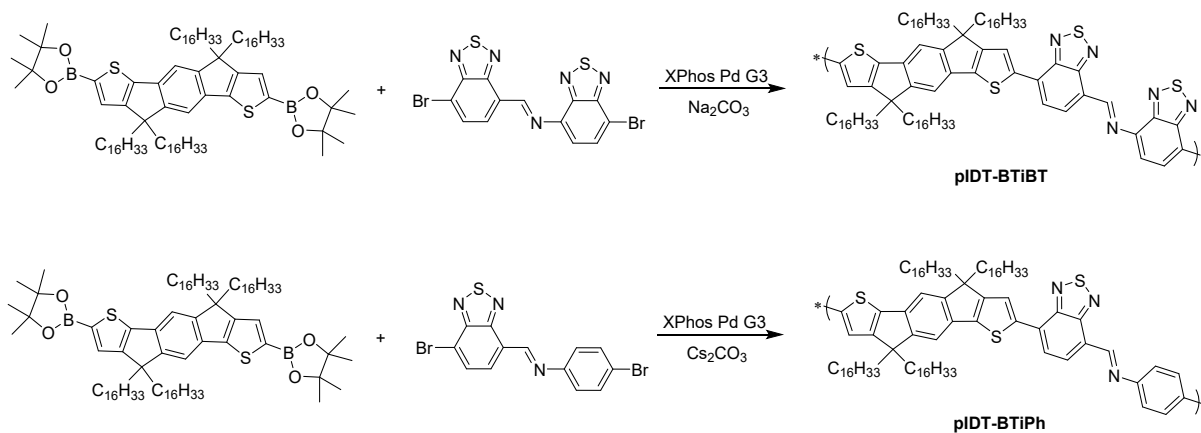

#### *pIDT-BTiBT:*

To a 10 mL round-bottom flask, anhydrous toluene (5 mL) and 1 drop of Aliquat 336 were added. To a 5 mL round-bottom flask, 2 M aqueous  $\text{Na}_2\text{CO}_3$  solution (1 mL) was made. Both solutions were degassed for 1 h. To a microwave reaction vessel with stir bar, 2,2'-(4,4,9,9-tetrahexadecyl-4,9-dihydro-s-indaceno[1,2-b:5,6-b']dithiophene-2,7-diyl)bis(4,4,5,5-tetramethyl-1,3,2-dioxaborolane) (75.0 mg, 53.0  $\mu\text{mol}$ , 1.0 equiv.), Br-BTiBT-Br (25.3 mg, 55.6  $\mu\text{mol}$ , 1.05 equiv.), and XPhos Pd G3 (0.897 mg, 1.06  $\mu\text{mol}$ , 0.02 equiv.) were added. The vial was sealed with a cap with septum in a  $\text{N}_2$ -filled glovebox. Then, the toluene solution (0.55 mL) was added, and the reaction was stirred until all solids dissolved. 2 M  $\text{Na}_2\text{CO}_3$  solution (0.11 mL) was added to make a 5:1 v/v toluene: $\text{H}_2\text{O}$  ratio. The reaction was degassed for 10 min. Then, the reaction was heated at 50  $^\circ\text{C}$  for 4 d. The reaction mixture was precipitated in methanol. The dark blue solid was collected and purified via Soxhlet extraction in methanol and acetone. The polymer was collected with chloroform and precipitated in cold methanol to yield a dark blue solid. Yield: 60 mg (76%)

#### *pIDT-BTiPh:*

To a 10 mL round-bottom flask, anhydrous toluene (5 mL) and 1 drop of Aliquat 336 were added. To a 5 mL round-bottom flask, 2 M aqueous  $\text{Cs}_2\text{CO}_3$  solution (1 mL) was made. Both solutions were degassed for 1 h. To a microwave reaction vessel with stir bar, 2,2'-(4,4,9,9-tetrahexadecyl-4,9-dihydro-s-indaceno[1,2-b:5,6-b']dithiophene-2,7-diyl)bis(4,4,5,5-tetramethyl-1,3,2-dioxaborolane) (75.0 mg, 53.0  $\mu\text{mol}$ , 1.0 equiv.), Br-BTiPh-Br (21.0 mg, 53.0  $\mu\text{mol}$ , 1.0 equiv.), and XPhos Pd G3 (0.897 mg, 1.06  $\mu\text{mol}$ , 0.02 equiv.) were added. The vial was sealed with a cap with septum in a  $\text{N}_2$ -filled glovebox. Then, the toluene solution (0.55 mL) was added, and the reaction was stirred until all solids dissolved. 2 M  $\text{Cs}_2\text{CO}_3$  solution (0.11 mL) was added to make a 5:1 v/v toluene: $\text{H}_2\text{O}$  ratio. The reaction was degassed for 10 min. Then, the reaction was heated at 80  $^\circ\text{C}$  for 3 d. The reaction mixture was precipitated in methanol. The dark blue solid was

collected and purified via Soxhlet extraction in methanol and acetone. The polymer was collected with chloroform and precipitated in cold methanol to yield a dark blue solid. Yield: 68 mg (90%)

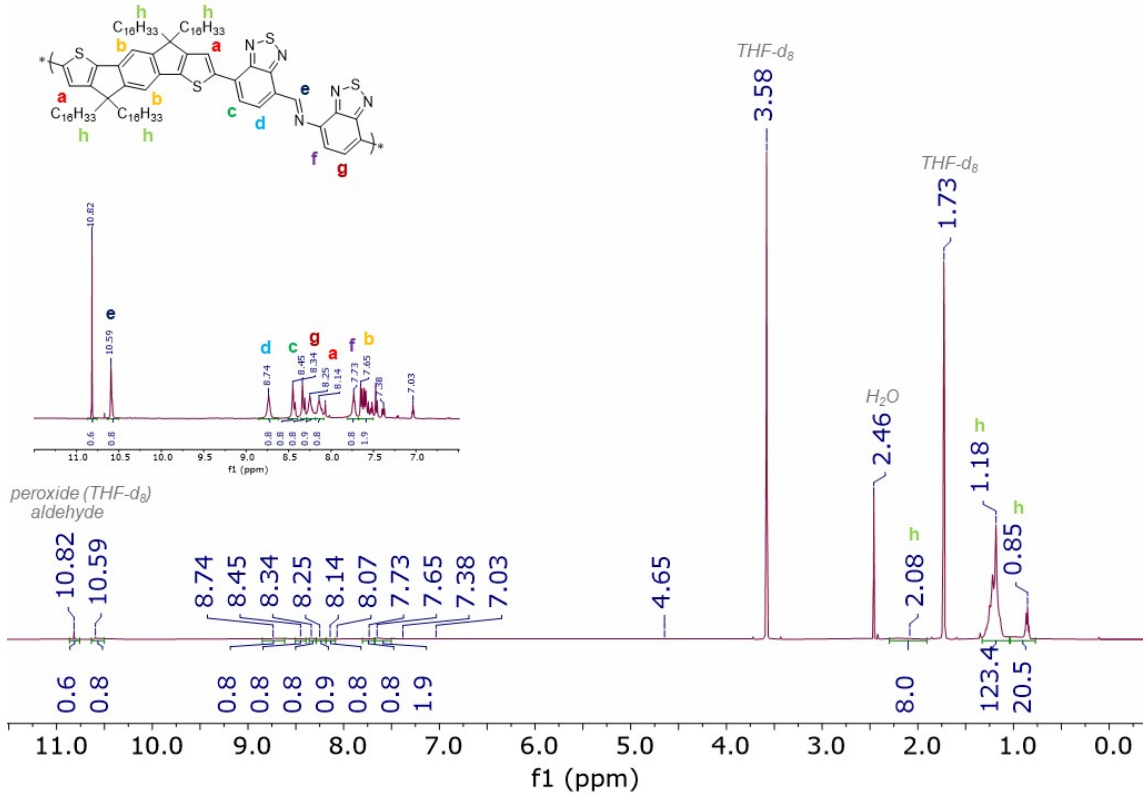

**Figure S6.** <sup>1</sup>H NMR spectra of pIDT-BTiBT in THF-*d*<sub>8</sub>.

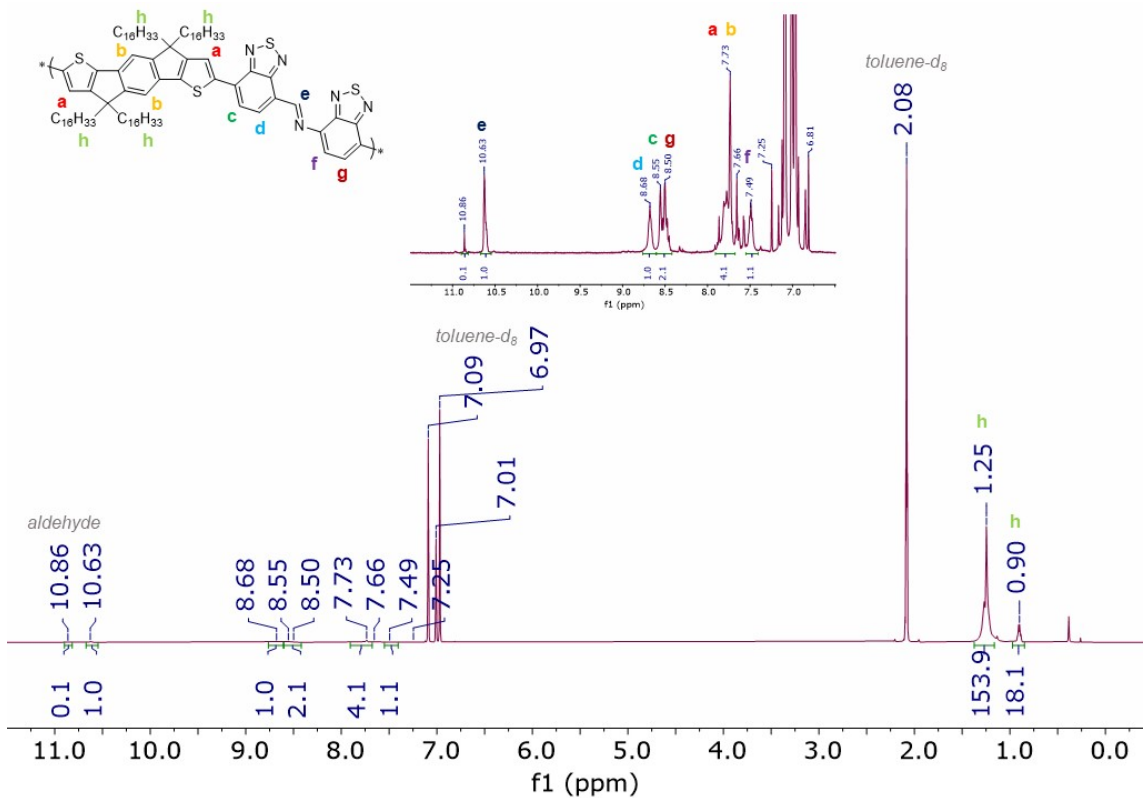

Figure S7.  $^1\text{H}$  NMR spectra of pIDT-BTiBT in  $\text{toluene-d}_8$ .

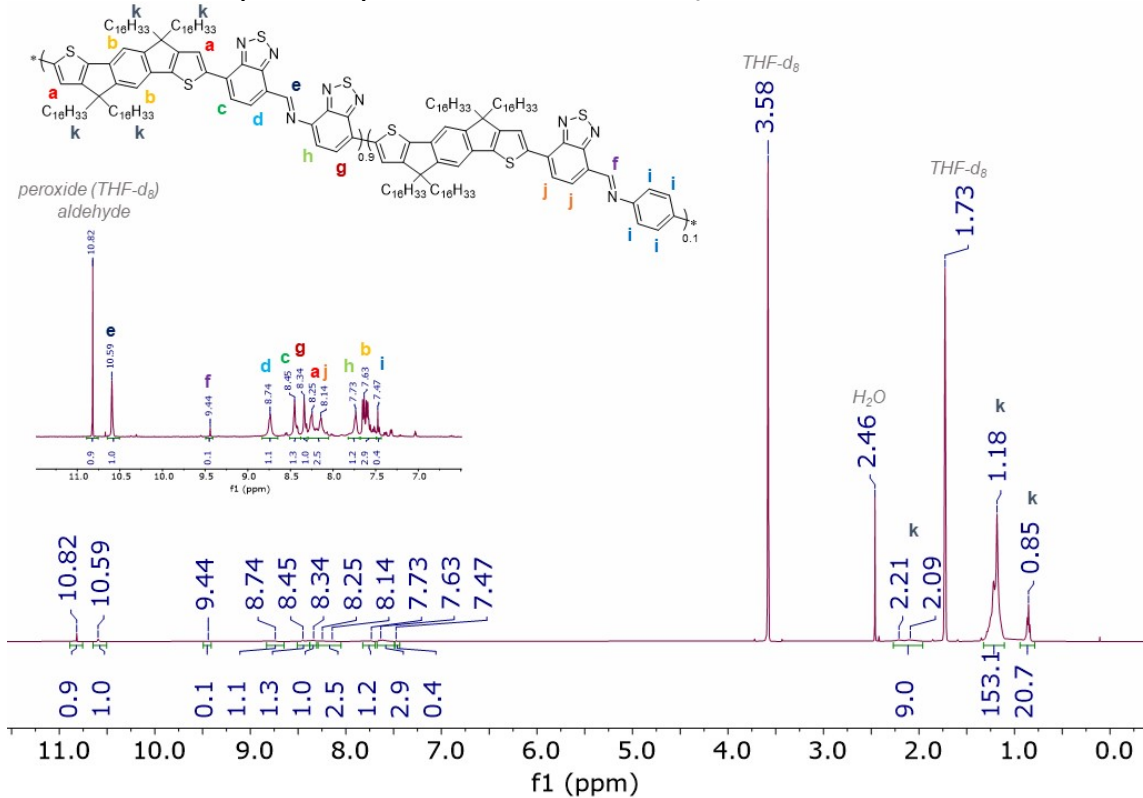

Figure S8.  $^1\text{H}$  NMR spectra of pIDT-10BTiPh in  $\text{THF-d}_8$ .

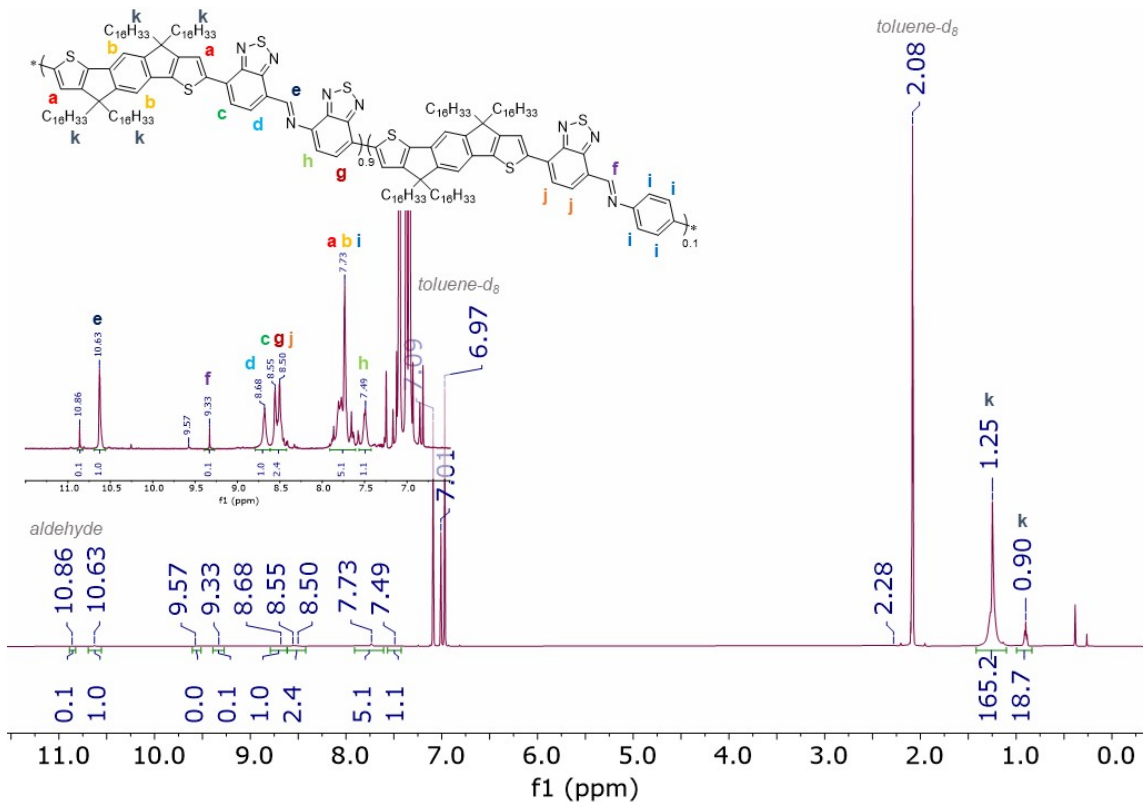

**Figure S9.** <sup>1</sup>H NMR spectra of pIDT-10BTiPh in toluene-*d*<sub>8</sub>.

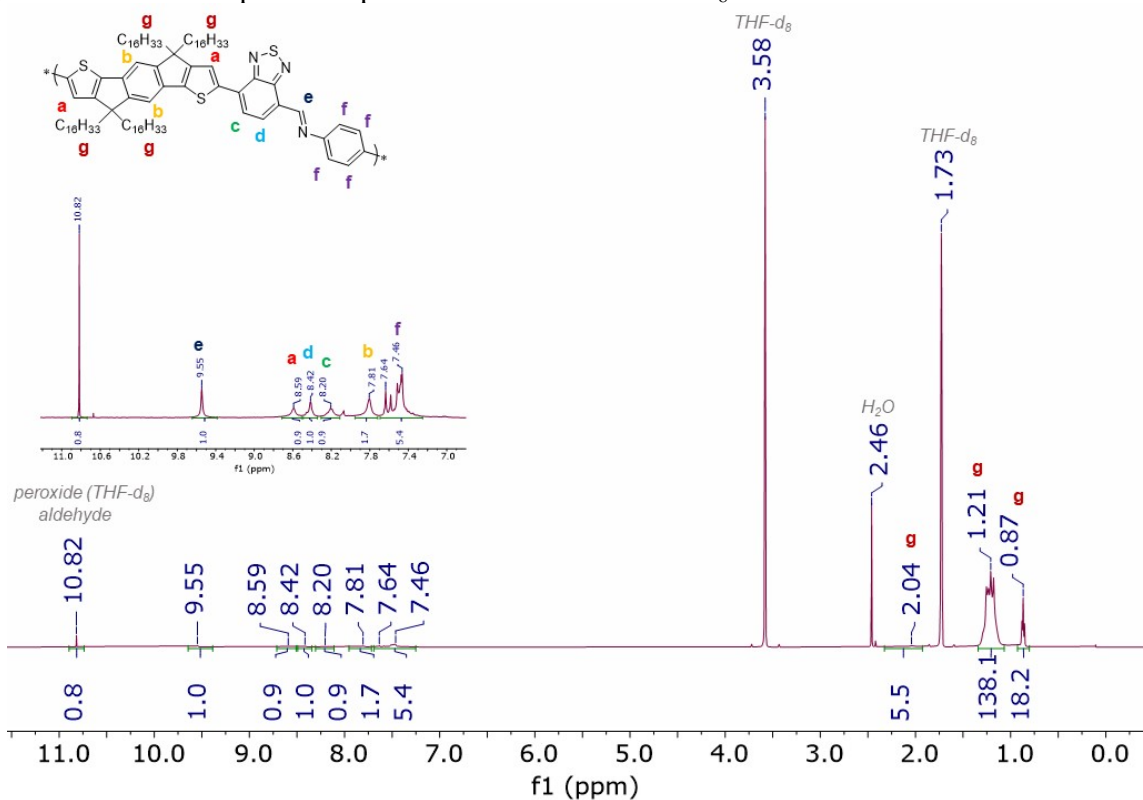

**Figure S10.** <sup>1</sup>H NMR spectra of pIDT-BTiPh in THF-*d*<sub>8</sub>.

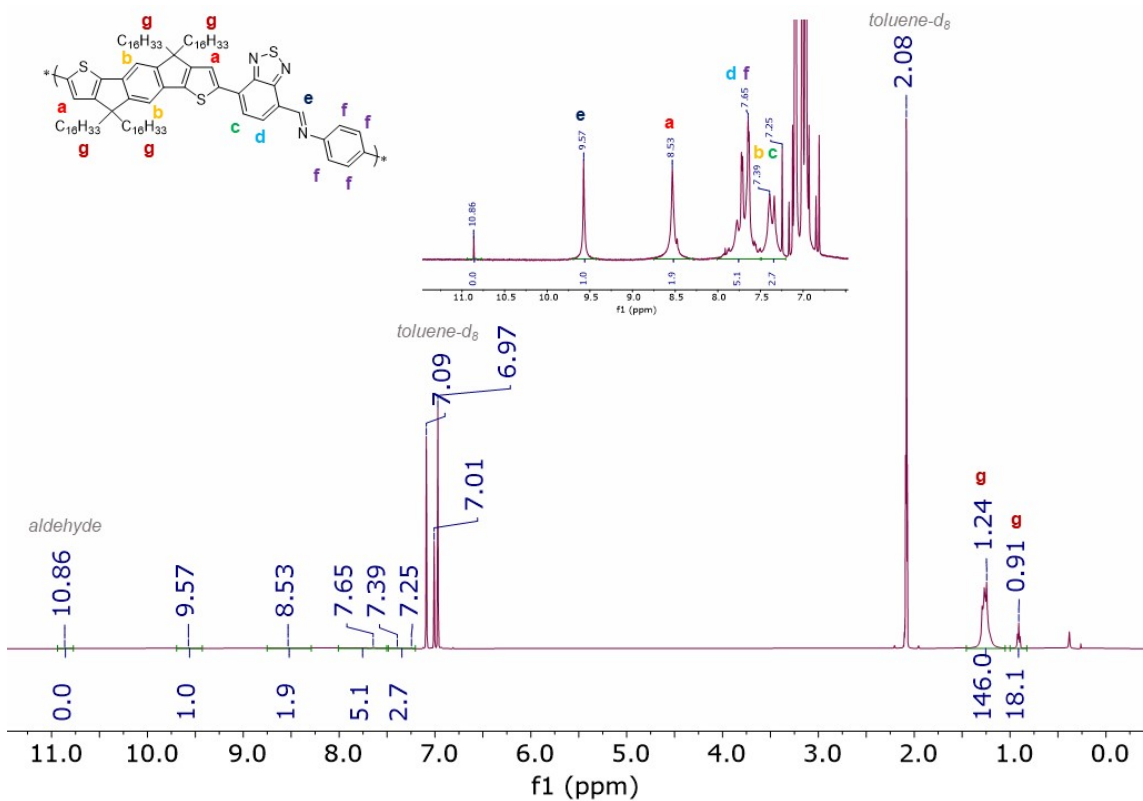

Figure S11. <sup>1</sup>H NMR spectra of pIDT-BTiPh in toluene-*d*<sub>8</sub>.

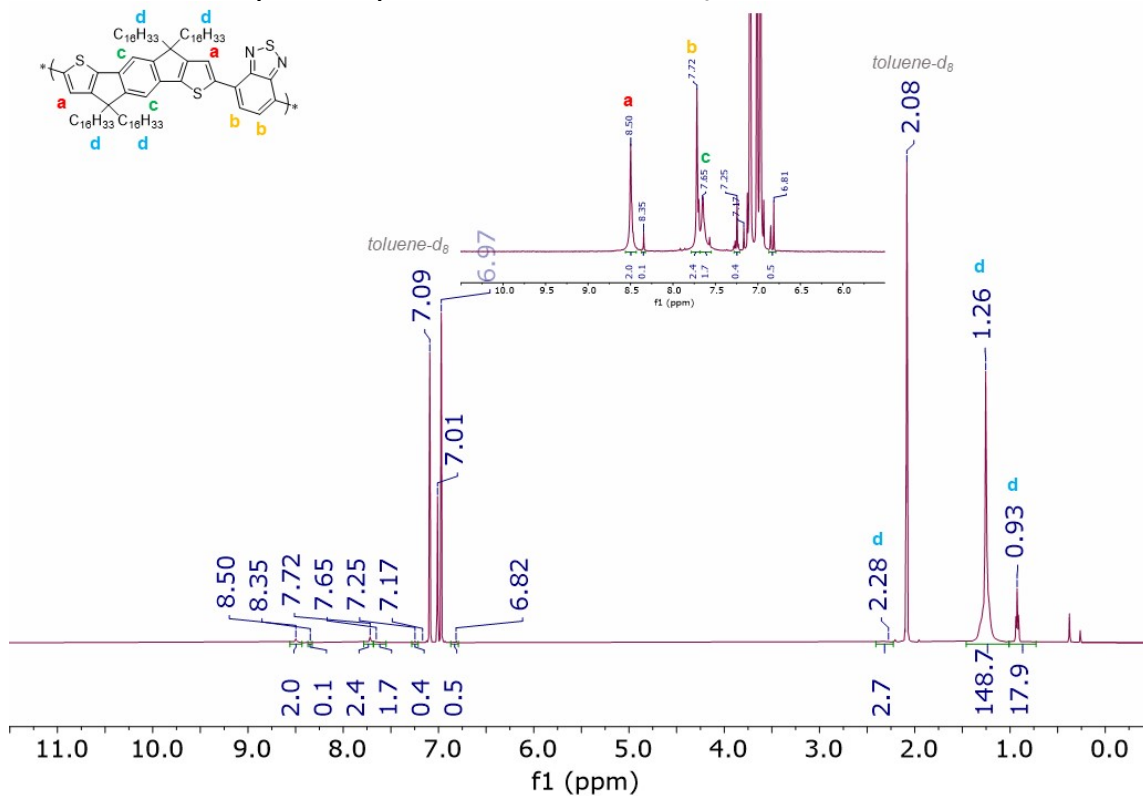

Figure S12. <sup>1</sup>H NMR spectra of pIDT-BT in toluene-*d*<sub>8</sub>.

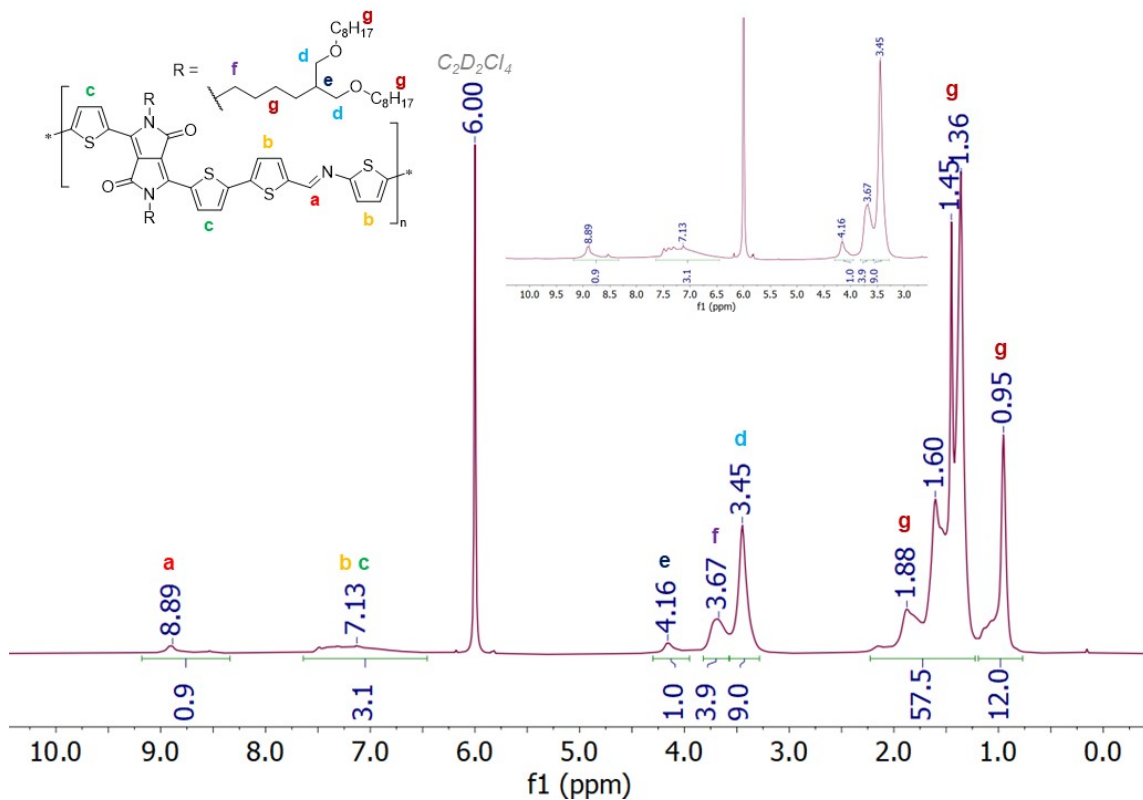

**Figure S13.**  $^1\text{H}$  NMR spectra of pDPP(C4E)-TIT in  $\text{C}_2\text{D}_2\text{Cl}_4$  at 393 K.

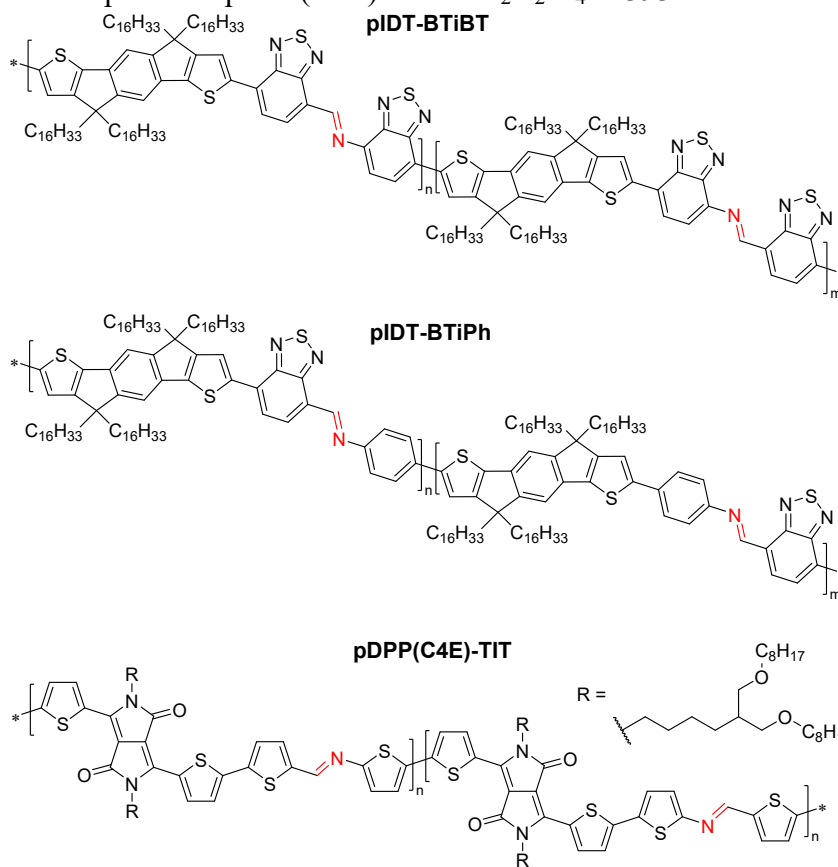

**Figure S14.** Chemical structures displaying regiorandom incorporation of imine co-monomers for all degradable, imine-based polymers.



**Synthesis of 7,7'-(4,4,9,9-tetrahexadecyl-4,9-dihydro-*s*-indaceno[1,2-*b*:5,6-*b'*]dithiophene-2,7-diyl)bis(benzo[*c*][1,2,5]thiadiazole-4-carbaldehyde)**

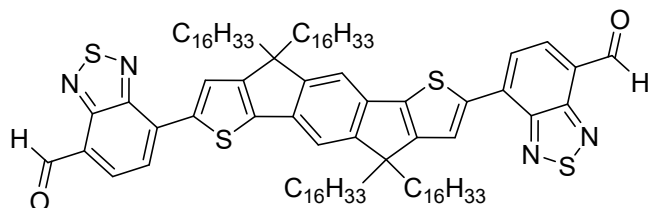

To a 10 mL round-bottom flask, anhydrous toluene (5 mL) and 1 drop of Aliquat 336 were added. To a 5 mL round-bottom flask, 2 M aqueous Na<sub>2</sub>CO<sub>3</sub> solution (1 mL) was made. Both solutions were degassed for 1 h. To a microwave reaction vessel with stir bar, 2,2'-(4,4,9,9-tetrahexadecyl-4,9-dihydro-*s*-indaceno[1,2-*b*:5,6-*b'*]dithiophene-2,7-diyl)bis(4,4,5,5-tetramethyl-1,3,2-dioxaborolane) (75.0 mg, 53.0 μmol, 1.0 equiv.), 7-bromobenzo[*c*][1,2,5]thiadiazole-4-carbaldehyde (36.0 mg, 148 μmol, 2.8 equiv.), and XPhos Pd G3 (2.24 mg, 2.65 μmol, 0.05 equiv.) were added. The vial was sealed with a cap with septum in a N<sub>2</sub>-filled glovebox. Then, the toluene solution (1.50 mL) was added, and the reaction was stirred until all solids dissolved. 2 M Na<sub>2</sub>CO<sub>3</sub> solution (0.30 mL) was added to make a 5:1 v/v toluene:H<sub>2</sub>O ratio. The reaction was degassed for 10 min. Then, the reaction was heated at 80 °C overnight (16 h). The reaction mixture was extracted into chloroform and washed with H<sub>2</sub>O. The organic layer was dried over Na<sub>2</sub>SO<sub>4</sub> and dried *in vacuo*. The crude product was purified by silica column chromatography using 70% DCM in hexanes as the eluent. The final product was a dark blue solid. Yield: 59 mg (75%).

<sup>1</sup>H NMR: (500 MHz, CD<sub>2</sub>Cl<sub>2</sub>) δ 10.73 (s, 2H), 8.28 (s, 2H), 8.24 (d, J = 7.6 Hz, 2H), 8.06 (d, J = 7.6 Hz, 2H), 7.45 (s, 1H), 2.17 – 2.07 (m, 4H), 2.02 – 1.91 (m, 4H), 1.23 – 1.05 (m, 106H), 0.90 – 0.83 (m, 18H).

<sup>13</sup>C NMR: (126 MHz, CD<sub>2</sub>Cl<sub>2</sub>) δ 188.55, 157.17, 154.44, 154.14, 152.39, 147.14, 140.81, 136.57, 134.26, 133.01, 125.01, 124.99, 122.90, 114.24, 77.36, 54.57, 39.25, 32.05, 30.08, 29.82, 29.78, 29.71, 29.48, 29.45, 24.38, 22.82, 14.25.

Calculated (M): 1488.00, measured (m/z, MALDI-TOF): 1488.23.

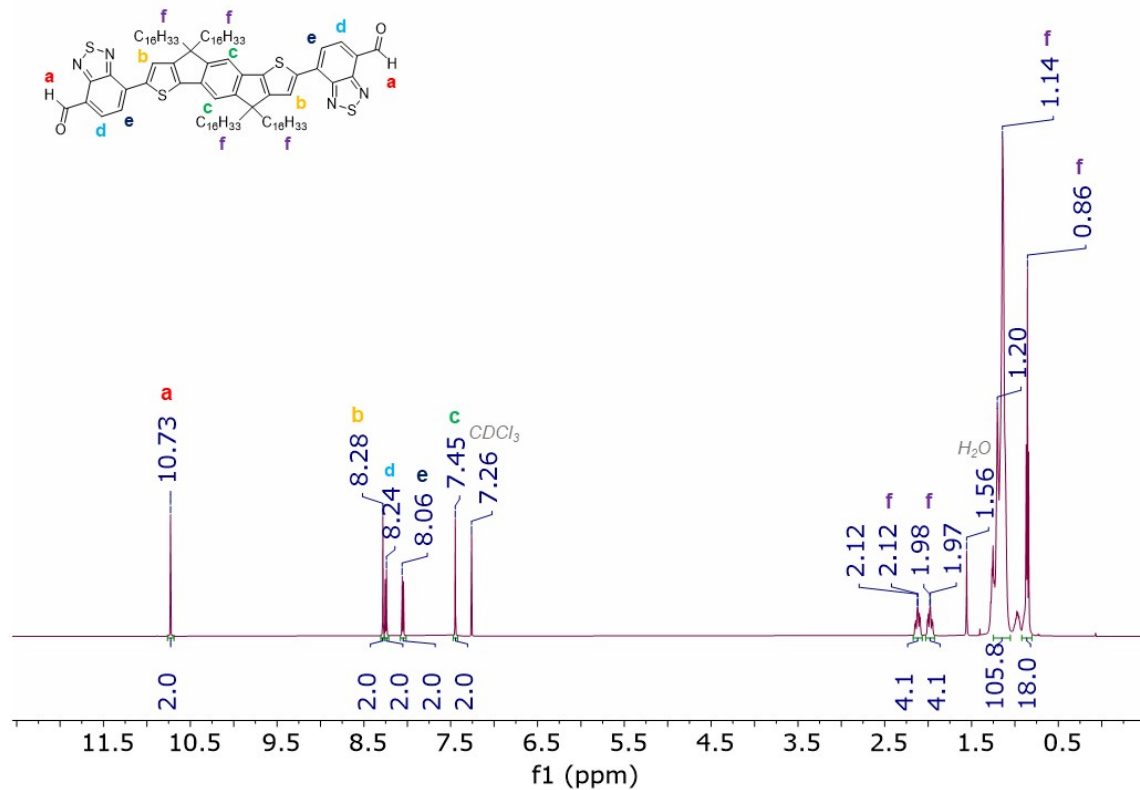

**Figure S15.** <sup>1</sup>H NMR spectra of 7,7'-(4,4,9,9-tetrahexadecyl-4,9-dihydro-*s*-indaceno[1,2-*b*:5,6-*b'*]dithiophene-2,7-diyl)bis(benzo[*c*][1,2,5]thiadiazole-4-carbaldehyde) in CDCl<sub>3</sub>.

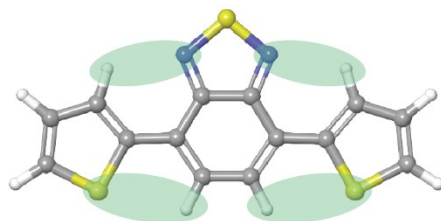

**Figure S16.** Preferred “cis” orientation of BT unit with thiophenes of IDT units due to stabilizing non-covalent interactions (green).<sup>2</sup>

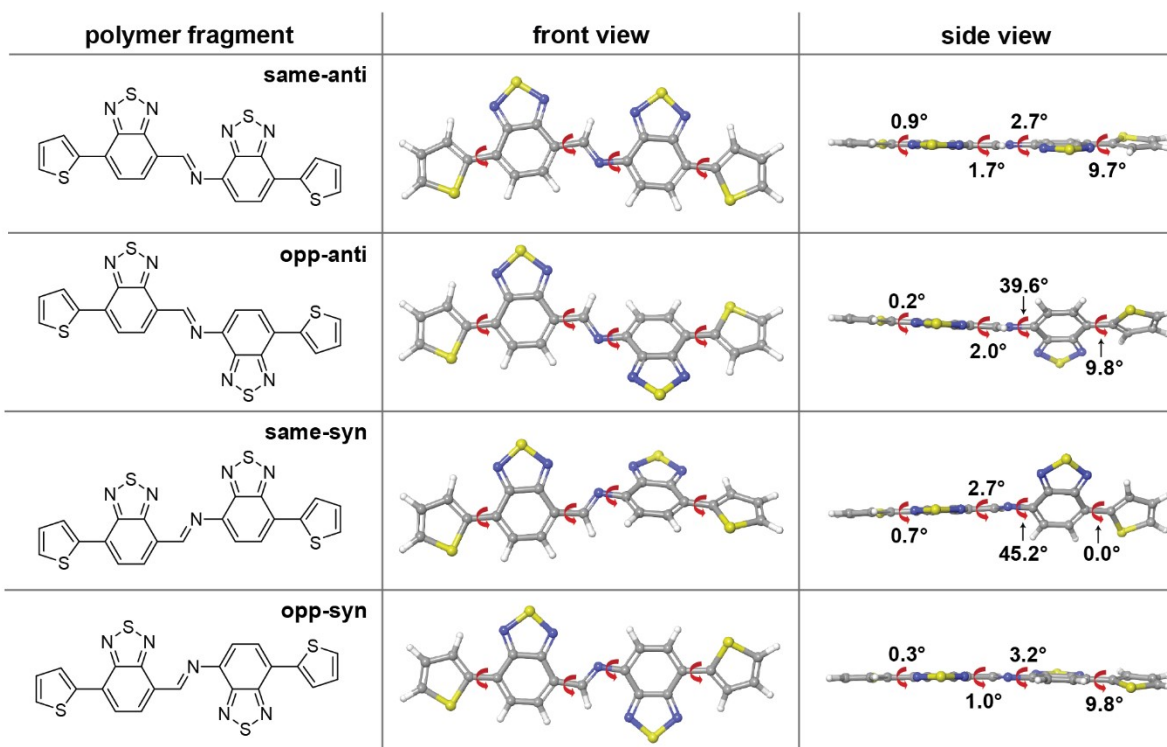

**Figure S17.** Chemical structures and corresponding DFT-optimized geometries for T-BTiBT-T polymer fragments. The conformers are labeled “same” for the BT units being on the same side and “opp” for being on opposite sides. They are also labeled “anti” for the imine nitrogen pointing away from the neighboring BT unit and “syn” for pointing toward the BT unit. Dihedral angles are marked by red arrows in both the front and side view. The unit preferred to be oriented with the imine hydrogen pointed toward the nitrogen on the neighboring BT unit likely due to potential hydrogen bonding interactions. Additionally, the BT units were energetically favored to be on the same side when in this configuration as there were less steric effects between the imine hydrogen and BT hydrogen, resulting in a more planar geometry for BTiBT.

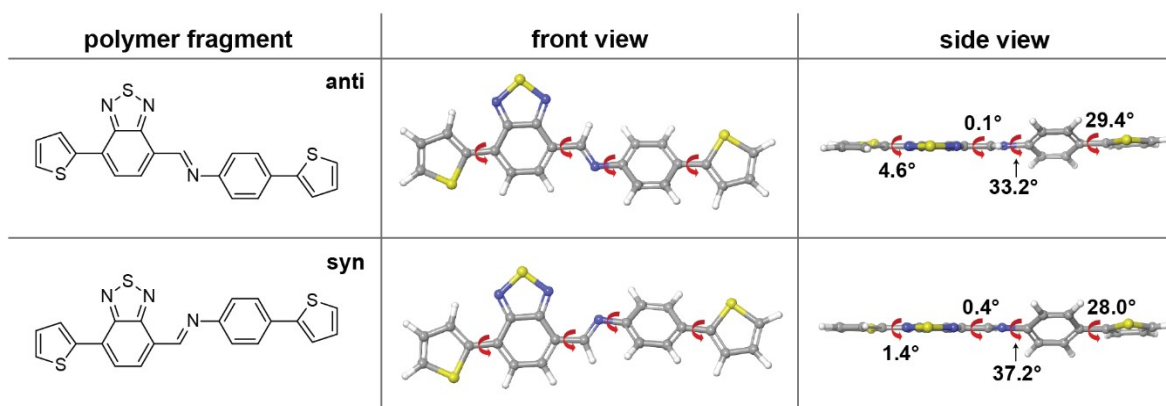

**Figure S18.** Chemical structures and corresponding DFT-optimized geometries for T-BTiPh-T polymer fragments. The conformers are labeled “anti” for the imine nitrogen pointing away from the neighboring BT unit and “syn” for pointing toward the BT unit. Dihedral angles are marked by red arrows in both the front and side view. BTiPh also preferred to be oriented with the imine hydrogen interacting with the BT nitrogen, agreeing with the results for BTiBT.

**Table S1.** Calculated Optimized Geometry Energies and Boltzmann Probabilities

| polymer fragment | conformer | $\Delta G_{298K}$ (kcal/mol) | probability <sup>a</sup> |
|------------------|-----------|------------------------------|--------------------------|
| T-BTiBT          | same-anti | 0                            | 94.47%                   |
|                  | opp-anti  | 1.75                         | 4.96%                    |
|                  | same-syn  | 5.67                         | 0.01%                    |
|                  | opp-syn   | 3.03                         | 0.57%                    |
| T-BTiPh-T        | anti      | 0                            | 99.74%                   |
|                  | syn       | 3.53                         | 0.26%                    |

<sup>a</sup>Probabilities were calculated by the Boltzmann distribution equation 
$$\frac{p_i}{p_{sum}} = \frac{e^{-\frac{\Delta G}{kT}}}{\sum e^{-\frac{\Delta G}{kT}}}$$
 where T = 298.15 K and k is the Boltzmann constant.

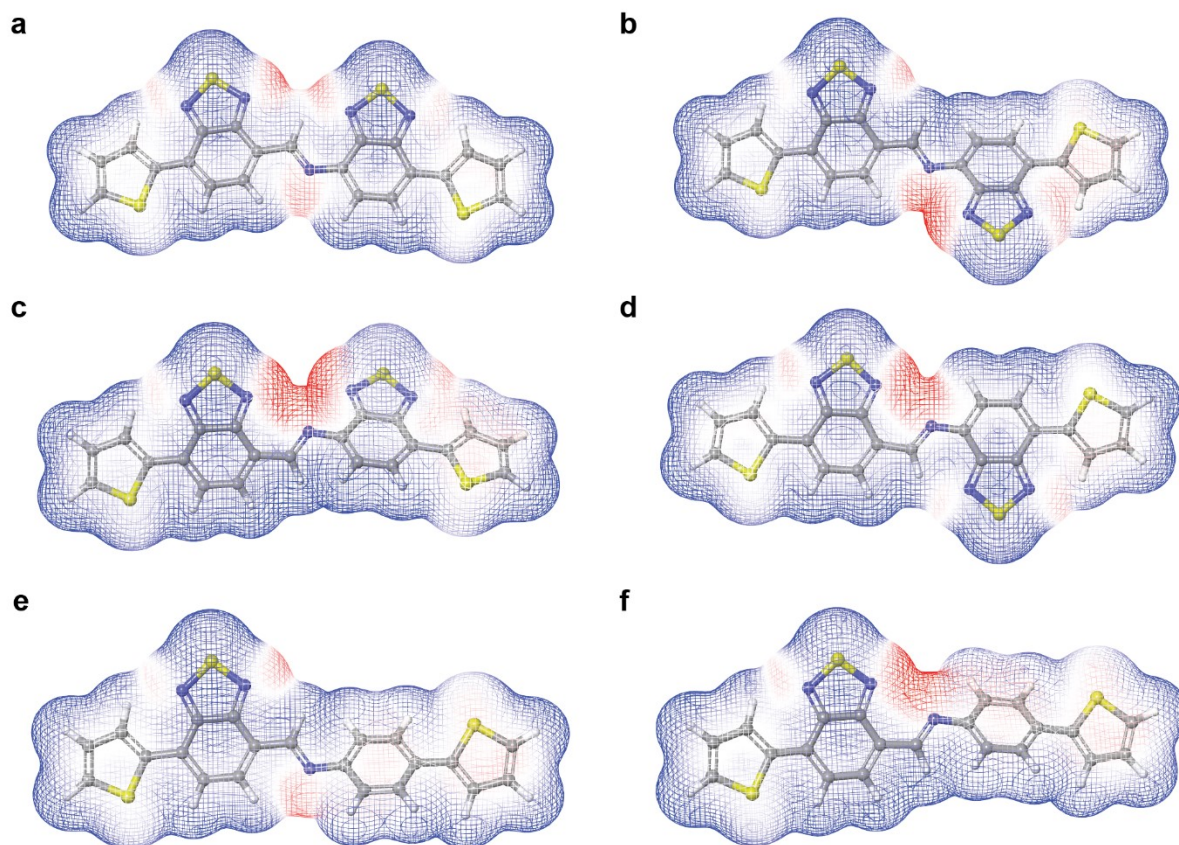

**Figure S19.** Electrostatic potential surfaces of T-BTiBT-T in the (a) same-anti, (b) opp-anti, (c) same-syn, (d) opp-syn conformations as well as T-BTiPh-T in the (e) anti and (f) syn conformations. Color scale from -30.0 to 10.0 kcal/mol with red indicating electronegative potential and blue indicating electropositive potential. The most favored conformations have electron density that is spread out over the entire molecule.

## DFT-Optimized Model for T-BT-T

Total energy: -1842.2390 hartrees

Cartesian coordinates (from left to right: atom, x, y, z in Å):

|     |             |              |              |     |             |              |              |
|-----|-------------|--------------|--------------|-----|-------------|--------------|--------------|
| S1  | 0.000000000 | 3.802100000  | 1.913000000  | C15 | 0.000000000 | -2.939500000 | 0.373000000  |
| C2  | 0.000000000 | 2.939500000  | 0.373000000  | S16 | 0.000000000 | -3.802100000 | 1.913000000  |
| C3  | 0.000000000 | 3.845600000  | -0.668500000 | C17 | 0.000000000 | -5.339200000 | 1.115500000  |
| C4  | 0.000000000 | 5.203000000  | -0.245300000 | C18 | 0.000000000 | -5.203000000 | -0.245300000 |
| C5  | 0.000000000 | 5.339200000  | 1.115500000  | C19 | 0.000000000 | -3.845600000 | -0.668500000 |
| C6  | 0.000000000 | 1.481500000  | 0.335100000  | H20 | 0.000000000 | 3.530600000  | -1.702000000 |
| C7  | 0.000000000 | 0.705700000  | 1.483700000  | H21 | 0.000000000 | 6.044500000  | -0.928200000 |
| C8  | 0.000000000 | -0.705700000 | 1.483700000  | H22 | 0.000000000 | 6.249000000  | 1.699900000  |
| C9  | 0.000000000 | -1.481500000 | 0.335100000  | H23 | 0.000000000 | 1.194900000  | 2.452700000  |
| C10 | 0.000000000 | -0.730700000 | -0.895700000 | H24 | 0.000000000 | -1.194900000 | 2.452700000  |
| C11 | 0.000000000 | 0.730700000  | -0.895700000 | H25 | 0.000000000 | -6.249000000 | 1.699900000  |
| N12 | 0.000000000 | 1.253600000  | -2.126400000 | H26 | 0.000000000 | -6.044500000 | -0.928200000 |
| S13 | 0.000000000 | 0.000000000  | -3.183800000 | H27 | 0.000000000 | -3.530600000 | -1.702000000 |
| N14 | 0.000000000 | -1.253600000 | -2.126400000 |     |             |              |              |

## DFT-Optimized Model for T-BTiBT-T (same-anti conformer)

Total energy: -2673.1488 hartrees

Cartesian coordinates (from left to right: atom, x, y, z in Å):

|     |              |              |              |     |              |              |              |
|-----|--------------|--------------|--------------|-----|--------------|--------------|--------------|
| C1  | 0.616400000  | 6.151600000  | -0.025400000 | N23 | -2.428600000 | 2.359300000  | 0.396200000  |
| C2  | 0.367200000  | 4.717500000  | -0.012000000 | S24 | -3.287000000 | 3.749900000  | 0.552300000  |
| C3  | 1.383200000  | 3.782900000  | -0.189700000 | N25 | -2.080500000 | 4.849100000  | 0.377400000  |
| C4  | 1.180400000  | 2.387200000  | -0.178100000 | C26 | -0.949500000 | 4.160300000  | 0.187900000  |
| C5  | -0.063400000 | 1.808900000  | 0.014100000  | C27 | -0.269800000 | 7.195800000  | 0.152200000  |
| C6  | -0.273100000 | 0.365300000  | 0.037500000  | C28 | 0.336600000  | 8.478500000  | 0.078100000  |
| N7  | 0.741500000  | -0.425800000 | -0.094500000 | C29 | 1.683400000  | 8.419700000  | -0.155900000 |
| C8  | 0.661500000  | -1.807400000 | -0.081700000 | S30 | 2.241700000  | 6.787500000  | -0.292500000 |
| C9  | 1.861800000  | -2.494600000 | -0.183000000 | H31 | 2.398500000  | 4.134100000  | -0.344900000 |
| C10 | 1.965100000  | -3.901900000 | -0.183100000 | H32 | 2.026400000  | 1.723900000  | -0.321900000 |
| C11 | 0.874500000  | -4.753900000 | -0.080200000 | H33 | -1.297800000 | 0.018000000  | 0.173300000  |
| C12 | 1.013700000  | -6.205400000 | -0.071300000 | H34 | 2.762800000  | -1.896100000 | -0.265600000 |
| C13 | 0.041800000  | -7.182700000 | -0.155200000 | H35 | 2.959800000  | -4.326700000 | -0.277100000 |
| C14 | 0.559400000  | -8.506400000 | -0.132600000 | H36 | -1.009000000 | -6.941400000 | -0.231400000 |
| C15 | 1.922300000  | -8.546000000 | -0.025900000 |     |              |              |              |
| S16 | 2.605700000  | -6.957500000 | 0.055800000  | H37 | -0.059000000 | -9.394300000 | -0.193900000 |
| C17 | -0.406700000 | -4.095800000 | 0.019600000  |     |              |              |              |
| N18 | -1.590600000 | -4.707000000 | 0.121600000  | H38 | 2.567700000  | -9.412700000 | 0.014600000  |
| S19 | -2.737400000 | -3.537200000 | 0.204000000  | H39 | -1.322400000 | 7.028200000  | 0.330200000  |
| N20 | -1.776700000 | -2.205300000 | 0.120700000  | H40 | -0.208300000 | 9.407800000  | 0.194700000  |
| C21 | -0.516700000 | -2.638800000 | 0.021000000  | H41 | 2.383100000  | 9.237900000  | -0.256900000 |
| C22 | -1.155400000 | 2.717900000  | 0.198700000  |     |              |              |              |

## DFT-Optimized Model for T-BTiPh-T (anti conformer)

Total energy: -2166.6664 hartrees

Cartesian coordinates (from left to right: atom, x, y, z in Å):

|             |              |              |              |             |              |              |              |
|-------------|--------------|--------------|--------------|-------------|--------------|--------------|--------------|
| H1          | -0.070000000 | -1.539500000 | 1.115800000  | C22         | -2.931000000 | -0.034600000 | -            |
| C2          | -0.668000000 | -0.813200000 | 0.575800000  | 0.048500000 |              |              |              |
| C3          | -0.004200000 | 0.180100000  | -0.120700000 | C23         | -4.380100000 | -0.174800000 | 0.003700000  |
| C4          | 1.450800000  | 0.285800000  | -0.156800000 | C24         | -5.358400000 | 0.647700000  | -0.520000000 |
| N5          | 2.193700000  | -0.553900000 | 0.471000000  | C25         | -6.681000000 | 0.194500000  | -0.267600000 |
| C6          | 3.588000000  | -0.479000000 | 0.381700000  | C26         | -6.718200000 | -0.972900000 | 0.445200000  |
| C7          | 4.330300000  | -0.904100000 | 1.497100000  | S27         | -5.130200000 | -1.546100000 | 0.823900000  |
| C8          | 5.715600000  | -0.855200000 | 1.489000000  | C28         | -2.075400000 | -0.911000000 | 0.610800000  |
| C9          | 6.421200000  | -0.425800000 | 0.347900000  | H29         | 1.855700000  | 1.122300000  | -0.738400000 |
| C10         | 7.886200000  | -0.423000000 | 0.348200000  | H30         | 3.790700000  | -1.243700000 | 2.375400000  |
| C11         | 8.736900000  | -1.226700000 | 1.073400000  | H31         | 6.265100000  | -1.140000000 | 2.380600000  |
| C12         | 10.115600000 | -0.958800000 | 0.841900000  | H32         | 8.380000000  | -2.010800000 | 1.731000000  |
| 0.841900000 |              |              |              | H33         | 10.923500000 | -1.501000000 |              |
| C13         | 10.315800000 | 0.049200000  | 0.060300000  | 1.319600000 |              |              |              |
| 0.060300000 |              |              |              | H34         | 11.252800000 | 0.451800000  | -            |
| S14         | 8.813300000  | 0.697100000  | -0.636300000 | 0.419000000 |              |              |              |
| C15         | 5.674700000  | -0.035000000 | -0.777900000 | H35         | 6.190800000  | 0.258200000  | -1.687600000 |
| C16         | 4.286300000  | -0.054200000 | -0.763600000 | H36         | 3.737000000  | 0.219200000  | -1.659100000 |
| C17         | -0.827500000 | 1.119600000  | -0.819600000 | H37         | -5.116800000 | 1.546700000  | -1.068300000 |
| N18         | -0.375000000 | 2.146000000  | -1.548800000 | H38         | -7.569000000 | 0.716400000  | -0.604100000 |
| S19         | -1.697400000 | 2.914200000  | -2.145700000 | H39         | -7.584100000 | -1.533300000 | 0.769600000  |
| N20         | -2.882800000 | 1.979500000  | -1.500300000 | H40         | -2.501200000 | -1.722500000 | 1.192900000  |
| C21         | -2.279800000 | 1.019600000  | -0.789300000 |             |              |              |              |

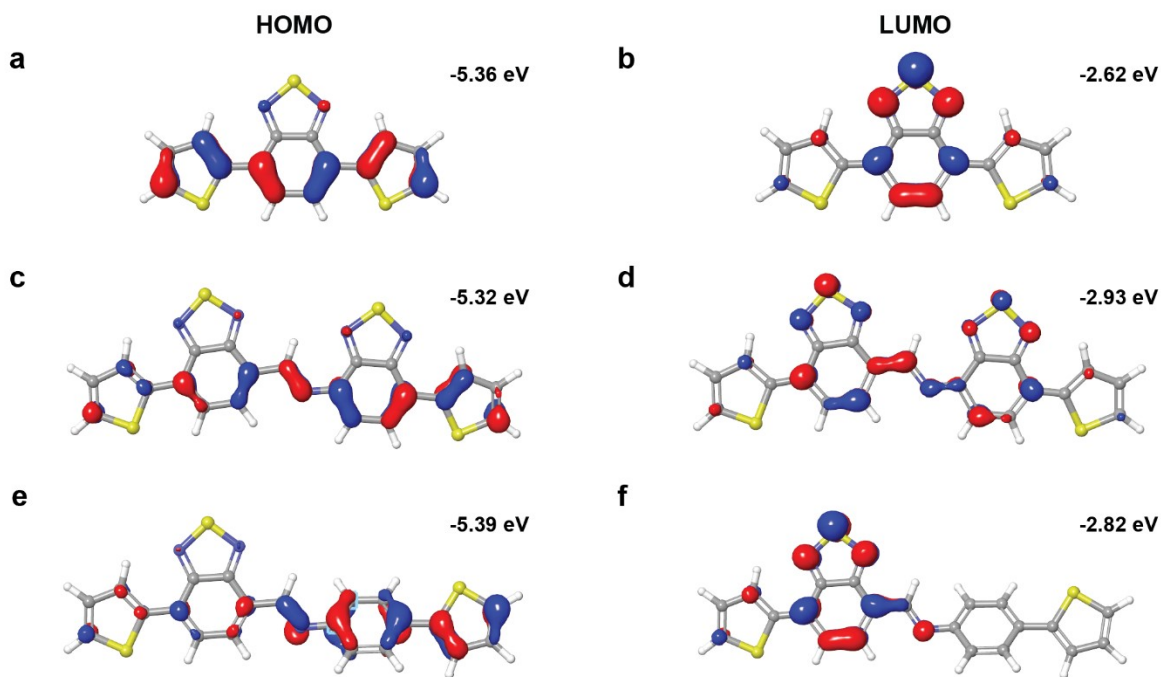

Figure S20. HOMO and LUMO orbitals and their corresponding energies (calculated at the

B3LYP-D3/6-31G\*\* level of theory) of the DFT-optimized models of (a,b) T-BT-T, (c,d) T-BTiBT-T, and (e, f) T-BTiPh-T. Orbital isosurfaces are illustrated at 0.05 electrons Bohr<sup>-3</sup>.

### DFT-Optimized Model for dialdehyde-functionalized BT-IDT-BT

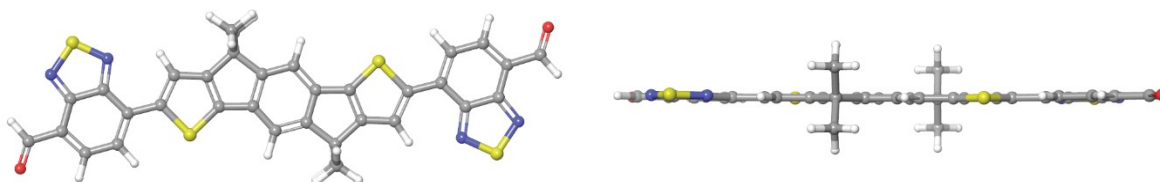

**Figure S21.** The DFT-optimized (B3LYP-D3/6-31G\*\*) gas-phase model of dialdehyde-functionalized BT-IDT-BT from different views. The alkyl chains on IDT were truncated to methyl groups to simplify the calculations.

Total energy: -3270.7460 hartrees

Cartesian coordinates (from left to right: atom, x, y, z in Å):

|     |              |              |              |     |              |              |              |
|-----|--------------|--------------|--------------|-----|--------------|--------------|--------------|
| O1  | -2.773600000 | -4.024700000 | -9.197700000 | N31 | -1.776500000 | -2.550100000 | 12.094400000 |
| C2  | -2.096900000 | -3.076500000 | -8.834800000 | C32 | -1.175500000 | -1.695900000 | 11.258100000 |
| C3  | -1.872900000 | -2.732500000 | -7.416600000 | C33 | -0.056900000 | -0.097400000 | 9.265800000  |
| C4  | -2.431300000 | -3.484800000 | -6.401200000 | C34 | 0.163200000  | 0.184500000  | 10.630000000 |
| C5  | -2.240200000 | -3.187200000 | -5.036000000 | C35 | -0.371100000 | -0.581200000 | 11.648300000 |
| C6  | -1.475000000 | -2.114100000 | -4.579100000 | C36 | -0.115600000 | -0.255500000 | 13.065300000 |
| C7  | -0.872600000 | -1.300300000 | -5.615300000 | O37 | 0.567300000  | 0.689300000  | 13.425400000 |
| N8  | -0.101200000 | -0.224500000 | -5.429000000 | C38 | -1.759100000 | -2.466200000 | 6.808300000  |
| S9  | 0.321600000  | 0.327500000  | -6.916100000 | C39 | -1.735000000 | -2.411700000 | 5.403400000  |
| N10 | -0.454100000 | -0.772400000 | -7.856300000 | C40 | -2.312000000 | -3.238500000 | 4.267700000  |
| C11 | -1.075100000 | -1.614800000 | -7.022600000 | C41 | -1.773200000 | -4.684400000 | 4.291800000  |
| C12 | -1.292300000 | -1.829900000 | -3.169700000 | C42 | -3.855300000 | -3.239200000 | 4.296000000  |
| C13 | -0.579500000 | -0.796600000 | -2.573500000 | C43 | -1.779600000 | -2.467800000 | 3.054000000  |
| C14 | -0.623600000 | -0.839900000 | -1.169100000 | C44 | -1.969900000 | -2.747900000 | 1.710500000  |
| C15 | -0.055600000 | -0.007300000 | -0.033800000 | H45 | -1.602700000 | -2.406800000 | -9.565000000 |
| C16 | 1.487400000  | -0.005900000 | -0.051800000 | H46 | -3.040700000 | -4.337400000 | -6.685700000 |
| C17 | -0.596100000 | 1.438400000  | -0.069700000 | H47 | -2.721800000 | -3.836800000 | -4.311800000 |
| C18 | -1.364100000 | -1.895500000 | -0.673000000 | H48 | -0.056900000 | -0.057400000 | -3.162800000 |
| S19 | -2.033200000 | -2.875200000 | -1.929900000 | H49 | 1.881300000  | 0.536200000  | 0.814000000  |
| C20 | -1.372800000 | -1.892300000 | 0.773400000  | H50 | 1.880200000  | -1.026300000 | -0.027200000 |
| C21 | -0.596900000 | -0.772500000 | 1.179300000  | H51 | -0.233200000 | 2.005600000  | 0.793600000  |
| C22 | -0.407400000 | -0.492100000 | 2.522600000  | H52 | -0.260300000 | 1.948500000  | -0.978400000 |
| C23 | -1.003600000 | -1.348400000 | 3.459500000  | H53 | 0.185700000  | 0.359600000  | 2.843200000  |
| C24 | -1.002500000 | -1.351100000 | 4.906000000  | H54 | 0.407800000  | 0.561400000  | 8.539000000  |
| S25 | -0.316700000 | -0.381100000 | 6.161100000  | H55 | 0.777200000  | 1.034900000  | 10.911000000 |
| C26 | -1.037400000 | -1.437900000 | 7.403400000  | H56 | -0.591800000 | -0.936100000 | 13.797400000 |
| C27 | -0.829100000 | -1.167200000 | 8.813000000  | H57 | -2.270200000 | -3.212700000 | 7.398700000  |
| C28 | -1.408300000 | -1.993900000 | 9.851700000  |     |              |              |              |
| N29 | -2.182100000 | -3.068600000 | 9.668700000  |     |              |              |              |
| S30 | -2.569300000 | -3.640900000 | 11.157800000 |     |              |              |              |



|     |               |               |               |
|-----|---------------|---------------|---------------|
| H58 | -2.1429000000 | -5.2463000000 | 3.4279000000  |
| H59 | -0.6800000000 | -4.6949000000 | 4.2673000000  |
| H60 | -4.2200000000 | -3.7319000000 | 5.2032000000  |
| H61 | -2.5592000000 | -3.6024000000 | 1.3900000000  |
| H62 | -1.6894000000 | 1.4474000000  | -0.0531000000 |

|     |               |               |               |
|-----|---------------|---------------|---------------|
| H63 | 1.8573000000  | 0.4844000000  | -0.9581000000 |
| H64 | -2.1034000000 | -5.1993000000 | 5.1997000000  |
| H65 | -4.2546000000 | -3.7789000000 | 3.4312000000  |
| H66 | -4.2476000000 | -2.2186000000 | 4.2762000000  |

*Assignment of the electronic transitions (CAM-B3LYP-D3/6-31G++\*\* level of TD-DFT):*  
(Number corresponding to the HOMO: 167)

-----  
Restricted Singlet Excited State 1:  
-----

Excitation energy = 0.0880396665 hartrees    2.39568122 eV  
517.53 nm

| excitation | X coeff. |
|------------|----------|
| 166 => 169 | -0.36999 |
| 167 => 168 | -0.90524 |
| 167 => 170 | -0.12464 |

Transition dipole moment (debye):  
X= 0.7173 Y= 1.0393 Z= 14.1444 Tot= 14.2007

Oscillator strength, f= 1.8321

Excitation energy = 0.1277823315 hartrees    3.47713416 eV  
356.57 nm

| excitation | X coeff. |
|------------|----------|
| 160 => 168 | 0.58927  |
| 160 => 169 | 0.54883  |
| 160 => 171 | 0.29726  |
| 160 => 172 | 0.38588  |
| 160 => 174 | -0.24361 |

Transition dipole moment (debye):  
X= -0.0667 Y= 0.0458 Z= 0.0040 Tot= 0.0810

Oscillator strength, f= 0.0001

-----  
Restricted Singlet Excited State 2:  
-----

Excitation energy = 0.1009308017 hartrees    2.74646685 eV  
451.43 nm

| excitation | X coeff. |
|------------|----------|
| 165 => 169 | 0.10979  |
| 166 => 168 | -0.47091 |
| 166 => 170 | 0.10031  |
| 167 => 169 | -0.85768 |

Transition dipole moment (debye):  
X= -0.0808 Y= 0.0413 Z= -0.0100 Tot= 0.0913

Oscillator strength, f= 0.0001

-----  
Restricted Singlet Excited State 5:  
-----

Excitation energy = 0.1328173102 hartrees    3.61414290 eV  
343.05 nm

| excitation | X coeff. |
|------------|----------|
| 157 => 169 | 0.10720  |
| 164 => 168 | -0.10864 |
| 165 => 168 | 0.27924  |
| 166 => 169 | -0.48492 |
| 166 => 171 | 0.21396  |
| 167 => 170 | 0.75115  |

Transition dipole moment (debye):  
X= 0.3263 Y= 0.4465 Z= -3.7619 Tot= 3.8023

Oscillator strength, f= 0.1981

-----  
Restricted Singlet Excited State 3:  
-----

Excitation energy = 0.1277537889 hartrees    3.47635747 eV  
356.65 nm

| excitation | X coeff. |
|------------|----------|
| 161 => 168 | 0.58919  |
| 161 => 169 | -0.54913 |
| 161 => 171 | -0.29736 |
| 161 => 172 | 0.38573  |
| 161 => 174 | 0.24320  |

Transition dipole moment (debye):  
X= -0.0665 Y= 0.0460 Z= 0.0044 Tot= 0.0809

Oscillator strength, f= 0.0001

-----  
Restricted Singlet Excited State 6:  
-----

Excitation energy = 0.1351632859 hartrees    3.67798014 eV  
337.10 nm

| excitation | X coeff. |
|------------|----------|
| 164 => 169 | 0.15580  |
| 165 => 169 | -0.30610 |
| 166 => 168 | 0.78095  |
| 166 => 170 | 0.12608  |
| 167 => 169 | -0.46723 |

Transition dipole moment (debye):  
X= 0.0322 Y= -0.0137 Z= 0.0016 Tot= 0.0350

Oscillator strength, f= 0.0000

-----  
Restricted Singlet Excited State 4:  
-----

Restricted Singlet Excited State 7:

Excitation energy = 0.1462889132 hartrees 3.98072386 eV  
311.46 nm

excitation X coeff.

-----  
157 => 169 0.17203  
164 => 168 -0.15260  
165 => 168 0.38837  
166 => 169 -0.55895  
166 => 171 -0.13780  
166 => 174 -0.10141  
167 => 168 0.35112  
167 => 170 -0.53671

Transition dipole moment (debye):

X= 0.4333 Y= 0.6060 Z= 3.5184 Tot= 3.5964

Oscillator strength, f= 0.1953

Restricted Singlet Excited State 8:

Excitation energy = 0.1523401618 hartrees 4.14538672 eV  
299.09 nm

excitation X coeff.

-----  
157 => 168 -0.12116  
162 => 169 0.15007  
163 => 168 0.37588  
164 => 169 0.26582  
165 => 169 -0.15062  
165 => 171 0.12006  
166 => 170 -0.46688  
166 => 172 -0.12983  
167 => 171 -0.60908  
167 => 174 -0.21105

Transition dipole moment (debye):

X= -0.0297 Y= 0.0184 Z= 0.0022 Tot= 0.0351

Oscillator strength, f= 0.0000

Restricted Singlet Excited State 9:

Excitation energy = 0.1547719300 hartrees 4.21155850 eV  
294.39 nm

excitation X coeff.

-----  
157 => 169 0.12873  
158 => 168 -0.30813  
159 => 169 -0.26970  
162 => 168 0.43224  
163 => 169 0.50454  
163 => 174 0.10775  
164 => 168 0.48947  
166 => 171 -0.11485  
167 => 172 -0.17343

Transition dipole moment (debye):

X= 0.9403 Y= 1.2726 Z= -0.6183 Tot= 1.6989

Oscillator strength, f= 0.0461

Restricted Singlet Excited State 10:

Excitation energy = 0.1558574397 hartrees 4.24109672 eV  
292.34 nm

excitation X coeff.

-----  
157 => 168 -0.29749  
158 => 169 0.38819  
159 => 168 0.31398  
159 => 170 -0.10047  
162 => 169 -0.34416  
163 => 168 -0.50147  
164 => 169 -0.21527  
165 => 169 -0.16099  
166 => 170 -0.23525  
166 => 184 0.10121  
167 => 171 -0.19688  
167 => 174 -0.22503

Transition dipole moment (debye):

X= -0.0344 Y= 0.0053 Z= -0.0029 Tot= 0.0350

Oscillator strength, f= 0.0000

Restricted Singlet Excited State 11:

Excitation energy = 0.1592689537 hartrees 4.33392874 eV  
286.08 nm

excitation X coeff.

-----  
158 => 168 0.19686  
159 => 169 0.17170  
162 => 168 -0.25319  
162 => 170 -0.14610  
164 => 168 0.35799  
164 => 170 0.20748  
164 => 176 0.10981  
165 => 168 0.31055  
165 => 170 0.19647  
165 => 172 -0.10777  
165 => 176 -0.14263  
166 => 169 0.10451  
167 => 172 0.12885  
167 => 176 -0.61990

Transition dipole moment (debye):

X= -1.0998 Y= -1.5426 Z= -0.3144 Tot= 1.9205

Oscillator strength, f= 0.0606

Restricted Singlet Excited State 12:

Excitation energy = 0.1618692312 hartrees 4.40468589 eV  
281.48 nm

excitation X coeff.

-----  
157 => 169 0.21349  
158 => 168 -0.53676  
159 => 169 -0.43905  
162 => 168 -0.33689

162 => 170 -0.12471  
163 => 169 -0.27944  
164 => 168 -0.19152  
166 => 174 0.12553  
167 => 176 -0.23216  
167 => 184 -0.14192

Transition dipole moment (debye):  
X= 2.3365 Y= 3.2701 Z= 0.2074 Tot= 4.0244

Oscillator strength, f= 0.2705

-----  
Restricted Singlet Excited State 13:  
-----

Excitation energy = 0.1619521765 hartrees 4.40694295 eV  
281.34 nm

excitation X coeff.

-----  
157 => 168 -0.14465  
158 => 168 0.10608  
158 => 169 0.45003  
159 => 168 0.48473  
162 => 169 0.21626  
163 => 168 0.43657  
164 => 169 0.23088  
166 => 172 0.15368  
166 => 184 0.11533  
167 => 171 0.27210  
167 => 188 -0.10283

Transition dipole moment (debye):  
X= -0.4585 Y= -0.6649 Z= -0.0496 Tot= 0.8092

Oscillator strength, f= 0.0109

-----  
Restricted Singlet Excited State 14:  
-----

Excitation energy = 0.1672733062 hartrees 4.55173825 eV  
272.39 nm

excitation X coeff.

-----  
156 => 168 -0.16846  
157 => 169 0.41906  
159 => 169 0.20278  
162 => 168 0.25738  
164 => 168 -0.24449  
165 => 168 0.54224  
166 => 169 0.49814  
167 => 168 -0.18769  
167 => 176 0.11634

Transition dipole moment (debye):  
X= -0.1471 Y= -0.2172 Z= 0.2697 Tot= 0.3763

Oscillator strength, f= 0.0024

-----  
Restricted Singlet Excited State 15:  
-----

Excitation energy = 0.1686940041 hartrees 4.59039741 eV  
270.09 nm

excitation X coeff.

-----  
156 => 169 -0.21048  
157 => 168 0.49145  
158 => 169 0.11698  
159 => 168 0.32986  
162 => 169 0.16904  
164 => 169 -0.21535  
165 => 169 0.48830  
166 => 168 0.26306  
166 => 172 -0.16329  
167 => 171 -0.37378

Transition dipole moment (debye):  
X= -0.0203 Y= 0.0167 Z= 0.0195 Tot= 0.0327

Oscillator strength, f= 0.0000

-----  
Restricted Singlet Excited State 16:  
-----

Excitation energy = 0.1706463724 hartrees 4.64352405 eV  
267.00 nm

excitation X coeff.

-----  
158 => 168 0.12095  
159 => 169 0.10059  
162 => 168 -0.19781  
163 => 169 -0.11302  
164 => 172 -0.10083  
165 => 168 0.18134  
165 => 170 0.22971  
166 => 171 -0.42142  
166 => 174 0.12683  
167 => 172 -0.72701  
167 => 176 0.14453

Transition dipole moment (debye):  
X= 0.2925 Y= 0.4205 Z= 3.7965 Tot= 3.8309

Oscillator strength, f= 0.2584

-----  
Restricted Singlet Excited State 17:  
-----

Excitation energy = 0.1723892114 hartrees 4.69094912 eV  
264.31 nm

excitation X coeff.

-----  
154 => 168 0.34564  
154 => 169 0.39863  
154 => 170 -0.17646  
154 => 171 -0.16162  
155 => 168 0.48515  
155 => 169 0.46415  
155 => 170 -0.24687  
155 => 171 -0.18798  
160 => 171 -0.12780  
160 => 172 -0.10869

Transition dipole moment (debye):  
X= 0.0104 Y= 0.0158 Z= 0.0029 Tot= 0.0191

Oscillator strength, f= 0.0000

-----  
Restricted Singlet Excited State 18:  
-----

-----  
Excitation energy = 0.1724131849 hartrees    4.69160147 eV  
264.27 nm

excitation    X coeff.  
-----

154 => 168    0.48488  
154 => 169    -0.46436  
154 => 170    -0.24703  
154 => 171    0.18823  
155 => 168    -0.34561  
155 => 169    0.39858  
155 => 170    0.17552  
155 => 171    -0.16140  
161 => 171    0.12849  
161 => 172    -0.10919

Transition dipole moment (debye):

X= 0.0116    Y= 0.0161    Z= -0.0223    Tot= 0.0299

Oscillator strength, f= 0.0000

-----  
Restricted Singlet Excited State 19:  
-----

Excitation energy = 0.1806447143 hartrees    4.91559278 eV  
252.23 nm

excitation    X coeff.  
-----

159 => 169    -0.10758  
162 => 168    -0.38262  
164 => 168    0.44107

165 => 168    0.33394  
166 => 171    0.11574  
167 => 172    0.22447  
167 => 176    0.61842

Transition dipole moment (debye):

X= -0.8664    Y= -1.2474    Z= 0.1122    Tot= 1.5230

Oscillator strength, f= 0.0432

-----  
Restricted Singlet Excited State 20:  
-----

Excitation energy = 0.1811609193 hartrees    4.92963943 eV  
251.51 nm

excitation    X coeff.  
-----

157 => 168    -0.20521  
157 => 170    0.11921  
158 => 169    0.16031  
159 => 168    0.12039  
165 => 171    0.11064  
166 => 168    -0.13987  
166 => 170    0.29479  
166 => 172    -0.44593  
167 => 171    -0.26615  
167 => 174    0.64820

Transition dipole moment (debye):

X= -0.0254    Y= 0.0123    Z= -0.0061    Tot= 0.0289

Oscillator strength, f= 0.0000

## DFT-Optimized Model for aldehyde-amino-functionalized BT-IDT-BT

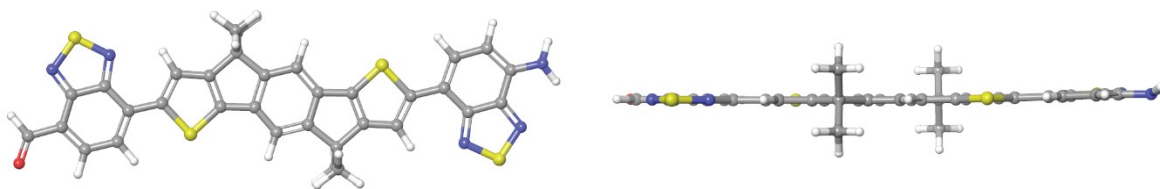

**Figure S22.** The DFT-optimized (B3LYP-D3/6-31G\*\*) gas-phase model of aldehyde-amino-functionalized BT-IDT-BT from different views. The alkyl chains on IDT were truncated to methyl groups to simplify the calculations.

*Total energy:* -3212.7759 hartrees

*Cartesian coordinates* (from left to right: atom, x, y, z in Å):

|     |              |              |               |     |              |              |               |
|-----|--------------|--------------|---------------|-----|--------------|--------------|---------------|
| N1  | -2.162500000 | -2.974300000 | 8.751000000   | C32 | -0.076200000 | -0.076300000 | -9.280900000  |
| C2  | -1.995100000 | -2.713300000 | 7.413500000   | C33 | 0.104700000  | 0.221200000  | -10.646100000 |
| C3  | -2.502700000 | -3.482300000 | 6.382800000   | C34 | -0.448500000 | -0.539000000 | -11.660100000 |
| C4  | -2.246100000 | -3.179500000 | 5.024300000   | C35 | -0.235900000 | -0.193300000 | -13.077500000 |
| C5  | -1.481100000 | -2.109700000 | 4.575100000   | C36 | -1.715200000 | -2.475100000 | -6.810000000  |
| C6  | -0.937300000 | -1.280600000 | 5.622100000   | C37 | -1.663700000 | -2.432200000 | -5.407600000  |
| N7  | -0.179800000 | -0.186500000 | 5.476000000   | C38 | -2.231400000 | -3.259900000 | -4.269400000  |
| S8  | 0.153500000  | 0.385600000  | 6.981000000   | C39 | -3.774500000 | -3.254000000 | -4.281200000  |
| N9  | -0.648400000 | -0.730600000 | 7.883800000   | C40 | -1.698200000 | -4.707800000 | -4.303800000  |
| C10 | -1.198200000 | -1.585200000 | 7.019200000   | C41 | -1.682700000 | -2.496200000 | -3.059700000  |
| C11 | -1.253900000 | -1.836300000 | 3.163400000   | C42 | -1.873000000 | -2.776500000 | -1.716200000  |
| C12 | -0.522200000 | -0.816000000 | 2.576300000   | H43 | -3.113900000 | -4.349500000 | 6.615600000   |
| C13 | -0.539300000 | -0.871200000 | 1.165500000   | H44 | -2.691100000 | -3.845700000 | 4.291200000   |
| C14 | 0.049800000  | -0.048500000 | 0.032200000   | H45 | -0.009500000 | -0.072600000 | 3.169200000   |
| C15 | 1.592600000  | -0.063800000 | 0.066200000   | H46 | 2.002000000  | 0.475200000  | -0.794600000  |
| C16 | -0.473500000 | 1.403000000  | 0.058100000   | H47 | 1.958500000  | 0.420600000  | 0.977500000   |
| C17 | -1.275300000 | -1.921900000 | 0.664100000   | H48 | -0.094500000 | 1.964800000  | -0.802000000  |
| S18 | -1.976000000 | -2.887400000 | 1.919500000   | H49 | -1.566500000 | 1.424200000  | 0.029100000   |
| C19 | -1.271200000 | -1.925200000 | -0.780200000  | H50 | 0.300800000  | 0.317500000  | -2.849900000  |
| C20 | -0.486400000 | -0.811000000 | -1.186500000  | H51 | 0.397900000  | 0.581000000  | -8.558800000  |
| C21 | -0.295400000 | -0.532300000 | -2.529000000  | H52 | 0.701200000  | 1.081700000  | -10.934300000 |
| C22 | -0.901200000 | -1.382700000 | -3.467200000  | O53 | 0.426200000  | 0.763400000  | -13.447300000 |
| C23 | -0.915400000 | -1.379800000 | -4.913100000  | H54 | -2.244300000 | -3.213200000 | -7.395700000  |
| S24 | -0.246800000 | -0.404100000 | -6.173000000  | H55 | -4.167100000 | -3.793800000 | -3.413300000  |
| C25 | -0.999900000 | -1.444800000 | -7.411300000  | H56 | -4.161300000 | -2.231500000 | -4.254200000  |
| C26 | -0.825800000 | -1.159800000 | -8.818800000  | H57 | -2.058200000 | -5.269900000 | -3.435900000  |
| C27 | -1.422100000 | -1.982500000 | -9.853000000  |     |              |              |               |
| N28 | -2.177800000 | -3.068300000 | -9.662000000  |     |              |              |               |
| S29 | -2.600400000 | -3.628600000 | -11.146500000 |     |              |              |               |
| N30 | -1.843200000 | -2.518700000 | -12.091700000 |     |              |              |               |
| C31 | -1.229900000 | -1.666900000 | -11.261900000 |     |              |              |               |

|     |               |               |               |     |               |               |                |
|-----|---------------|---------------|---------------|-----|---------------|---------------|----------------|
| H58 | -2.0411000000 | -5.2200000000 | -5.2088000000 | H62 | 1.9734000000  | -1.0887000000 | 0.0443000000   |
| H59 | -2.4705000000 | -3.6251000000 | -1.3952000000 | H63 | -0.1429000000 | 1.9111000000  | 0.9699000000   |
| H60 | -4.1517000000 | -3.7421000000 | -5.1859000000 | H64 | -0.7255000000 | -0.8706000000 | -13.8043000000 |
| H61 | -0.6048000000 | -4.7211000000 | -4.2930000000 | H65 | -1.9380000000 | -2.2217000000 | 9.3856000000   |
|     |               |               |               | H66 | -2.9339000000 | -3.5629000000 | 9.0248000000   |

*Assignment of the electronic transitions (CAM-B3LYP-D3/6-31G++\*\* level of TD-DFT):*  
 (Number corresponding to the HOMO: 164)

Restricted Singlet Excited State 1:

Excitation energy = 0.0863932138 hartrees 2.35087896 eV  
 527.40 nm

excitation X coeff.

163 => 165 0.36286  
 163 => 166 -0.24089  
 164 => 165 0.77337  
 164 => 166 0.40566  
 164 => 167 0.11345

Transition dipole moment (debye):

X= 0.6575 Y= 0.9918 Z= -12.8920 Tot= 12.9468

Oscillator strength, f= 1.4943

Restricted Singlet Excited State 2:

Excitation energy = 0.0952345516 hartrees 2.59146400 eV  
 478.43 nm

excitation X coeff.

162 => 166 0.12488  
 163 => 165 -0.34433  
 163 => 166 -0.31779  
 163 => 167 0.10228  
 164 => 165 -0.32825  
 164 => 166 0.78681

Transition dipole moment (debye):

X= 0.2656 Y= 0.1963 Z= 0.6185 Tot= 0.7012

Oscillator strength, f= 0.0048

Restricted Singlet Excited State 3:

Excitation energy = 0.1235571245 hartrees 3.36216042 eV  
 368.76 nm

excitation X coeff.

162 => 165 0.33449  
 163 => 165 0.58277  
 163 => 166 -0.17201  
 163 => 168 0.13320  
 164 => 165 -0.27970  
 164 => 167 -0.57863

164 => 168 -0.17650

Transition dipole moment (debye):

X= 0.2422 Y= 0.4566 Z= 3.8856 Tot= 3.9198

Oscillator strength, f= 0.1959

Restricted Singlet Excited State 4:

Excitation energy = 0.1282932315 hartrees 3.49103645 eV  
 355.15 nm

excitation X coeff.

158 => 165 -0.79723  
 158 => 166 0.10172  
 158 => 168 0.46457  
 158 => 170 -0.28024  
 158 => 188 -0.11217

Transition dipole moment (debye):

X= -0.0671 Y= 0.0474 Z= 0.0064 Tot= 0.0824

Oscillator strength, f= 0.0001

Restricted Singlet Excited State 5:

Excitation energy = 0.1298830932 hartrees 3.53429879 eV  
 350.80 nm

excitation X coeff.

162 => 165 -0.15634  
 162 => 166 0.18617  
 163 => 165 -0.46730  
 163 => 166 -0.24398  
 163 => 167 -0.17195  
 163 => 170 0.12735  
 164 => 165 0.40396  
 164 => 166 -0.23593  
 164 => 167 -0.56563  
 164 => 168 -0.19107

Transition dipole moment (debye):

X= -0.0597 Y= -0.0994 Z= 5.0316 Tot= 5.0330

Oscillator strength, f= 0.3395

Restricted Singlet Excited State 6:

Excitation energy = 0.1450437403 hartrees 3.94684099 eV  
314.14 nm

| excitation | X coeff. |
|------------|----------|
| 157 => 166 | -0.15006 |
| 162 => 165 | 0.21251  |
| 162 => 166 | 0.44209  |
| 163 => 166 | -0.65199 |
| 164 => 165 | -0.14006 |
| 164 => 166 | -0.32976 |
| 164 => 167 | 0.35750  |

Transition dipole moment (debye):  
X= 0.4085 Y= 0.5873 Z= -2.1768 Tot= 2.2913

Oscillator strength, f= 0.0786

-----  
Restricted Singlet Excited State 7:  
-----

Excitation energy = 0.1480913724 hartrees 4.02977127 eV  
307.67 nm

| excitation | X coeff. |
|------------|----------|
| 157 => 165 | 0.16385  |
| 159 => 165 | 0.20431  |
| 162 => 165 | 0.20036  |
| 162 => 166 | -0.13216 |
| 162 => 167 | -0.11795 |
| 163 => 165 | -0.10601 |
| 163 => 167 | -0.55517 |
| 164 => 167 | -0.10065 |
| 164 => 168 | 0.51563  |
| 164 => 170 | 0.39580  |

Transition dipole moment (debye):  
X= -0.0207 Y= -0.1822 Z= -0.0397 Tot= 0.1877

Oscillator strength, f= 0.0005

-----  
Restricted Singlet Excited State 8:  
-----

Excitation energy = 0.1544974013 hartrees 4.20408819 eV  
294.91 nm

| excitation | X coeff. |
|------------|----------|
| 155 => 165 | 0.43385  |
| 157 => 165 | 0.10287  |
| 159 => 165 | -0.70756 |
| 160 => 165 | -0.32523 |
| 161 => 165 | -0.17643 |
| 162 => 165 | 0.11589  |
| 163 => 168 | -0.12828 |
| 164 => 170 | 0.14771  |

Transition dipole moment (debye):  
X= 0.5998 Y= 0.8238 Z= 0.3314 Tot= 1.0716

Oscillator strength, f= 0.0183

-----  
Restricted Singlet Excited State 9:  
-----

Excitation energy = 0.1578393840 hartrees 4.29502817 eV  
288.67 nm

| excitation | X coeff. |
|------------|----------|
| 155 => 165 | 0.15060  |
| 157 => 165 | -0.11117 |
| 159 => 165 | -0.21161 |
| 160 => 165 | 0.21080  |
| 160 => 167 | 0.20259  |
| 161 => 165 | 0.25731  |
| 161 => 167 | 0.17149  |
| 162 => 165 | -0.23591 |
| 162 => 174 | -0.18501 |
| 163 => 165 | 0.13125  |
| 163 => 166 | -0.11073 |
| 163 => 174 | 0.15337  |
| 164 => 170 | 0.17480  |
| 164 => 174 | 0.67064  |

Transition dipole moment (debye):  
X= 0.2816 Y= 0.3645 Z= -0.2781 Tot= 0.5381

Oscillator strength, f= 0.0047

-----  
Restricted Singlet Excited State 10:  
-----

Excitation energy = 0.1595281613 hartrees 4.34098214 eV  
285.61 nm

| excitation | X coeff. |
|------------|----------|
| 154 => 165 | 0.14734  |
| 155 => 165 | 0.28647  |
| 156 => 165 | 0.15888  |
| 157 => 165 | 0.37519  |
| 159 => 165 | 0.22342  |
| 160 => 165 | 0.21743  |
| 162 => 165 | 0.50271  |
| 163 => 165 | -0.28572 |
| 163 => 166 | 0.16887  |
| 163 => 167 | 0.12728  |
| 163 => 168 | -0.10013 |
| 164 => 165 | 0.11988  |
| 164 => 168 | -0.27282 |
| 164 => 174 | 0.25265  |

Transition dipole moment (debye):  
X= 0.7904 Y= 1.1854 Z= -1.1655 Tot= 1.8407

Oscillator strength, f= 0.0558

-----  
Restricted Singlet Excited State 11:  
-----

Excitation energy = 0.1615385378 hartrees 4.39568726 eV  
282.06 nm

| excitation | X coeff. |
|------------|----------|
| 155 => 165 | 0.65940  |
| 156 => 165 | -0.19305 |
| 157 => 165 | -0.29609 |
| 159 => 165 | 0.39173  |
| 162 => 165 | -0.20182 |
| 163 => 165 | 0.12042  |

163 => 170 0.12087  
164 => 174 -0.22808

Transition dipole moment (debye):  
X= 1.6466 Y= 2.3561 Z= 0.1254 Tot= 2.8772

Oscillator strength, f= 0.1380

-----  
Restricted Singlet Excited State 12:  
-----

Excitation energy = 0.1648020684 hartrees 4.48449245 eV  
276.47 nm

| excitation | X coeff. |
|------------|----------|
| 156 => 166 | -0.60681 |
| 157 => 166 | 0.24532  |
| 160 => 166 | 0.26155  |
| 161 => 165 | -0.14272 |
| 161 => 166 | -0.37597 |
| 163 => 181 | 0.13503  |
| 163 => 182 | 0.10155  |
| 163 => 183 | 0.13647  |
| 164 => 169 | 0.15748  |
| 164 => 181 | -0.21817 |
| 164 => 182 | -0.15095 |
| 164 => 183 | -0.19855 |

Transition dipole moment (debye):  
X= 0.6077 Y= 0.8825 Z= 0.6670 Tot= 1.2621

Oscillator strength, f= 0.0271

-----  
Restricted Singlet Excited State 13:  
-----

Excitation energy = 0.1681525453 hartrees 4.57566356 eV  
270.96 nm

| excitation | X coeff. |
|------------|----------|
| 155 => 165 | -0.19462 |
| 156 => 166 | 0.13869  |
| 159 => 165 | 0.11928  |
| 160 => 166 | 0.18845  |
| 161 => 165 | -0.26032 |
| 161 => 166 | -0.40804 |
| 161 => 167 | -0.16517 |
| 161 => 168 | -0.10083 |
| 162 => 166 | -0.17722 |
| 162 => 167 | 0.12774  |
| 163 => 166 | -0.13467 |
| 163 => 168 | -0.39029 |
| 164 => 168 | -0.36054 |
| 164 => 169 | -0.16851 |
| 164 => 170 | 0.28389  |
| 164 => 181 | 0.16676  |
| 164 => 188 | -0.12086 |

Transition dipole moment (debye):  
X= -0.3899 Y= -0.4931 Z= -1.7532 Tot= 1.8625

Oscillator strength, f= 0.0602

-----  
Restricted Singlet Excited State 14:  
-----

Excitation energy = 0.1687393323 hartrees 4.59163085 eV  
270.02 nm

| excitation | X coeff. |
|------------|----------|
| 156 => 166 | -0.12895 |
| 162 => 169 | -0.19885 |
| 163 => 168 | 0.13274  |
| 163 => 169 | 0.40512  |
| 164 => 168 | 0.11716  |
| 164 => 169 | -0.77696 |
| 164 => 171 | 0.12473  |
| 164 => 173 | 0.10352  |

Transition dipole moment (debye):  
X= 0.1362 Y= 0.3985 Z= 0.9204 Tot= 1.0122

Oscillator strength, f= 0.0178

-----  
Restricted Singlet Excited State 15:  
-----

Excitation energy = 0.1723580266 hartrees 4.69010053 eV  
264.35 nm

| excitation | X coeff. |
|------------|----------|
| 146 => 165 | 0.10237  |
| 151 => 165 | 0.83763  |
| 151 => 166 | -0.14737 |
| 151 => 167 | -0.33801 |
| 151 => 168 | 0.22093  |
| 158 => 165 | -0.11906 |
| 158 => 167 | 0.11018  |
| 158 => 168 | -0.15411 |

Transition dipole moment (debye):  
X= 0.0007 Y= -0.0064 Z= -0.0060 Tot= 0.0088

Oscillator strength, f= 0.0000

-----  
Restricted Singlet Excited State 16:  
-----

Excitation energy = 0.1727692552 hartrees 4.70129063 eV  
263.72 nm

| excitation | X coeff. |
|------------|----------|
| 155 => 165 | -0.14768 |
| 156 => 166 | -0.23315 |
| 157 => 165 | 0.11745  |
| 157 => 166 | 0.29290  |
| 160 => 165 | -0.17038 |
| 160 => 166 | -0.31088 |
| 161 => 165 | 0.16867  |
| 161 => 166 | 0.39729  |
| 162 => 166 | -0.15985 |
| 163 => 166 | -0.14510 |
| 163 => 167 | -0.29568 |
| 163 => 168 | -0.25230 |
| 163 => 170 | 0.12390  |
| 163 => 181 | 0.12454  |
| 164 => 167 | 0.11155  |
| 164 => 168 | -0.27433 |
| 164 => 170 | 0.11892  |
| 164 => 181 | -0.12338 |



164 => 183 -0.13094

Transition dipole moment (debye):

X= 0.6133 Y= 0.8631 Z= -1.3182 Tot= 1.6908

Oscillator strength, f= 0.0510

-----  
Restricted Singlet Excited State 17:  
-----

Excitation energy = 0.1743053141 hartrees 4.74308892 eV  
261.40 nm

excitation X coeff.

-----  
163 => 169 -0.13805  
163 => 173 -0.13635  
164 => 171 0.81592  
164 => 173 0.16440  
164 => 176 -0.19137  
164 => 184 -0.12847  
164 => 186 0.15511  
164 => 189 -0.16177

Transition dipole moment (debye):

X= 0.1074 Y= -0.1950 Z= -0.3535 Tot= 0.4178

Oscillator strength, f= 0.0031

-----  
Restricted Singlet Excited State 18:  
-----

Excitation energy = 0.1750206339 hartrees 4.76255377 eV  
260.33 nm

excitation X coeff.

-----  
154 => 165 -0.12653  
154 => 166 0.10978  
156 => 165 -0.16433  
156 => 166 -0.22270  
157 => 165 -0.24071  
159 => 165 0.10850  
160 => 165 -0.24792  
161 => 166 0.12744  
162 => 165 0.23402  
162 => 166 0.40536  
162 => 167 0.20475  
163 => 166 0.25898  
163 => 167 0.18093  
164 => 167 -0.11229  
164 => 168 0.12358  
164 => 170 0.43036  
164 => 171 -0.12740

164 => 174 0.17166

164 => 182 -0.10202

Transition dipole moment (debye):

X= 0.4009 Y= 0.6488 Z= -2.0860 Tot= 2.2210

Oscillator strength, f= 0.0891

-----  
Restricted Singlet Excited State 19:  
-----

Excitation energy = 0.1780368408 hartrees 4.84462893 eV  
255.92 nm

excitation X coeff.

-----  
155 => 165 0.10935  
157 => 165 -0.14649  
159 => 165 0.23053  
160 => 165 -0.45989  
160 => 167 -0.10607  
161 => 165 -0.44859  
162 => 166 -0.14194  
163 => 168 0.14082  
164 => 170 -0.32402  
164 => 174 0.44843

Transition dipole moment (debye):

X= -0.8141 Y= -1.1874 Z= 0.1944 Tot= 1.4528

Oscillator strength, f= 0.0388

-----  
Restricted Singlet Excited State 20:  
-----

Excitation energy = 0.1787007797 hartrees 4.86269563 eV  
254.97 nm

excitation X coeff.

-----  
147 => 166 0.16982  
150 => 166 0.16268  
152 => 165 0.11492  
152 => 166 0.87360  
152 => 167 -0.22073  
152 => 168 -0.13109  
152 => 170 -0.11834  
153 => 166 0.14388

Transition dipole moment (debye):

X= 0.0756 Y= 0.0681 Z= -0.0842 Tot= 0.1321

Oscillator strength, f= 0.0003

## DFT-Optimized Model for diamino-functionalized BT-IDT-BT

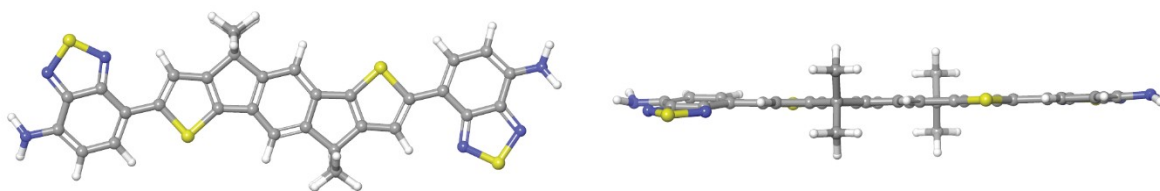

**Figure S23.** The DFT-optimized (B3LYP-D3/6-31G\*\*) gas-phase model of diamino-functionalized BT-IDT-BT from different views. The alkyl chains on IDT were truncated to methyl groups to simplify the calculations.

*Total energy:* -3154.8038 hartrees

*Cartesian coordinates* (from left to right: atom, x, y, z in Å):

|     |               |               |                |     |               |               |                |
|-----|---------------|---------------|----------------|-----|---------------|---------------|----------------|
| N1  | -2.2238000000 | -2.8712000000 | 8.7663000000   | C32 | -0.2744000000 | -0.0021000000 | -9.2946000000  |
| C2  | -1.9853000000 | -2.6674000000 | 7.4255000000   | C33 | -0.0840000000 | 0.3236000000  | -10.6598000000 |
| C3  | -2.5079000000 | -3.4318000000 | 6.4002000000   | C34 | -0.4765000000 | -0.5234000000 | -11.6783000000 |
| C4  | -2.2674000000 | -3.1287000000 | 5.0380000000   | C35 | -1.7507000000 | -2.4866000000 | -6.8153000000  |
| C5  | -1.5012000000 | -2.0632000000 | 4.5812000000   | C36 | -1.7042000000 | -2.4351000000 | -5.4053000000  |
| C6  | -0.9308000000 | -1.2460000000 | 5.6239000000   | C37 | -2.2907000000 | -3.2463000000 | -4.2633000000  |
| N7  | -0.1457000000 | -0.1726000000 | 5.4701000000   | C38 | -3.8333000000 | -3.2191000000 | -4.2839000000  |
| S8  | 0.2383000000  | 0.3747000000  | 6.9721000000   | C39 | -1.7793000000 | -4.7021000000 | -4.2837000000  |
| N9  | -0.5762000000 | -0.7258000000 | 7.8835000000   | C40 | -1.7383000000 | -2.4824000000 | -3.0540000000  |
| C10 | -1.1750000000 | -1.5525000000 | 7.0242000000   | C41 | -1.9364000000 | -2.7481000000 | -1.7089000000  |
| C11 | -1.2849000000 | -1.7916000000 | 3.1678000000   | H42 | -1.5902000000 | -2.4051000000 | 9.4002000000   |
| C12 | -0.5438000000 | -0.7839000000 | 2.5718000000   | H43 | -2.5065000000 | -3.7973000000 | 9.0494000000   |
| C13 | -0.5716000000 | -0.8428000000 | 1.1612000000   | H44 | -3.1291000000 | -4.2902000000 | 6.6392000000   |
| C14 | 0.0266000000  | -0.0374000000 | 0.0203000000   | H45 | -2.7243000000 | -3.7915000000 | 4.3093000000   |
| C15 | 1.5690000000  | -0.0764000000 | 0.0497000000   | H46 | -0.0139000000 | -0.0472000000 | 3.1583000000   |
| C16 | -0.4731000000 | 1.4225000000  | 0.0354000000   | H47 | 1.9840000000  | 0.4470000000  | -0.8182000000  |
| C17 | -1.3252000000 | -1.8842000000 | 0.6680000000   | H48 | 1.9466000000  | 0.4107000000  | 0.9549000000   |
| S18 | -2.0311000000 | -2.8352000000 | 1.9310000000   | H49 | -0.0885000000 | 1.9702000000  | -0.8314000000  |
| C19 | -1.3240000000 | -1.8981000000 | -0.7779000000  | H50 | -1.5656000000 | 1.4601000000  | 0.0094000000   |
| C20 | -0.5234000000 | -0.8008000000 | -1.1913000000  | H51 | 0.2847000000  | 0.3026000000  | -2.8633000000  |
| C21 | -0.3252000000 | -0.5353000000 | -2.5369000000  | H52 | 0.0543000000  | 0.7372000000  | -8.5703000000  |
| C22 | -0.9396000000 | -1.3839000000 | -3.4684000000  | H53 | 0.3847000000  | 1.2719000000  | -10.9069000000 |
| C23 | -0.9477000000 | -1.3939000000 | -4.9151000000  | H54 | -2.2837000000 | -3.2243000000 | -7.3977000000  |
| S24 | -0.2562000000 | -0.4384000000 | -6.1834000000  | H55 | -4.2395000000 | -3.7473000000 | -3.4148000000  |
| C25 | -1.0263000000 | -1.4696000000 | -7.4149000000  | H56 | -4.2049000000 | -2.1907000000 | -4.2661000000  |
| C26 | -0.8542000000 | -1.1759000000 | -8.8300000000  | H57 | -2.1538000000 | -5.2538000000 | -3.4149000000  |
| C27 | -1.2856000000 | -2.0828000000 | -9.8649000000  | H58 | -2.1224000000 | -5.2153000000 | -5.1883000000  |
| N28 | -1.8837000000 | -3.2689000000 | -9.7002000000  |     |               |               |                |
| S29 | -2.1739000000 | -3.8840000000 | -11.1968000000 |     |               |               |                |
| N30 | -1.5512000000 | -2.6727000000 | -12.1199000000 |     |               |               |                |
| C31 | -1.0953000000 | -1.7522000000 | -11.2679000000 |     |               |               |                |

|     |              |              |              |
|-----|--------------|--------------|--------------|
| H59 | -2.546600000 | -3.585700000 | -1.382300000 |
| H60 | -4.212300000 | -3.707500000 | -5.187900000 |
| H61 | -0.686300000 | -4.730900000 | -4.264800000 |
| H62 | 1.932800000  | -1.107600000 | 0.036000000  |

|     |              |              |               |
|-----|--------------|--------------|---------------|
| H63 | -0.131600000 | 1.934000000  | 0.941500000   |
| N64 | -0.277300000 | -0.293500000 | -13.021200000 |
| H65 | -0.830100000 | -0.858400000 | -13.650400000 |
| H66 | -0.144000000 | 0.663500000  | -13.311000000 |

*Assignment of the electronic transitions (CAM-B3LYP-D3/6-31G++\*\* level of TD-DFT):*  
 (Number corresponding to the HOMO: 161)

-----  
 Restricted Singlet Excited State 1:  
 -----

Excitation energy = 0.0879376233 hartrees    2.39290448 eV  
 518.13 nm

excitation    X coeff.  
 -----

|            |          |
|------------|----------|
| 159 => 162 | -0.13666 |
| 159 => 164 | 0.10479  |
| 160 => 163 | 0.48731  |
| 161 => 162 | -0.84464 |

Transition dipole moment (debye):  
 X= -0.6908    Y= -0.8970    Z= 10.2656    Tot= 10.3279

Oscillator strength, f= 0.9679

-----  
 Restricted Singlet Excited State 2:  
 -----

Excitation energy = 0.0927828607 hartrees    2.52475010 eV  
 491.08 nm

excitation    X coeff.  
 -----

|            |          |
|------------|----------|
| 159 => 163 | 0.19518  |
| 160 => 162 | -0.54333 |
| 160 => 164 | 0.11620  |
| 161 => 163 | 0.79964  |

Transition dipole moment (debye):  
 X= -0.0505    Y= 0.0847    Z= -0.5356    Tot= 0.5446

Oscillator strength, f= 0.0028

-----  
 Restricted Singlet Excited State 3:  
 -----

Excitation energy = 0.1199371719 hartrees    3.26365650 eV  
 379.89 nm

excitation    X coeff.  
 -----

|            |          |
|------------|----------|
| 159 => 162 | 0.25717  |
| 160 => 163 | -0.35150 |
| 160 => 167 | -0.24546 |
| 161 => 162 | -0.14441 |
| 161 => 164 | -0.83140 |

Transition dipole moment (debye):  
 X= 0.2096    Y= 0.3554    Z= 8.3116    Tot= 8.3219

Oscillator strength, f= 0.8571

-----  
 Restricted Singlet Excited State 4:  
 -----

Excitation energy = 0.1341198316 hartrees    3.64958631 eV  
 339.72 nm

excitation    X coeff.  
 -----

|            |          |
|------------|----------|
| 155 => 162 | -0.15730 |
| 159 => 163 | 0.42700  |
| 160 => 162 | -0.66740 |
| 160 => 164 | -0.10441 |
| 161 => 163 | -0.55302 |

Transition dipole moment (debye):  
 X= -0.0437    Y= 0.0335    Z= -0.0509    Tot= 0.0750

Oscillator strength, f= 0.0001

-----  
 Restricted Singlet Excited State 5:  
 -----

Excitation energy = 0.1394829920 hartrees    3.79552533 eV  
 326.66 nm

excitation    X coeff.  
 -----

|            |          |
|------------|----------|
| 155 => 163 | -0.19762 |
| 159 => 162 | 0.45330  |
| 160 => 163 | -0.55292 |
| 160 => 167 | 0.11826  |
| 161 => 162 | -0.46264 |
| 161 => 164 | 0.43107  |

Transition dipole moment (debye):  
 X= 0.4084    Y= 0.5447    Z= -3.0799    Tot= 3.1542

Oscillator strength, f= 0.1432

-----  
 Restricted Singlet Excited State 6:  
 -----

Excitation energy = 0.1452841275 hartrees    3.95338225 eV  
 313.62 nm

excitation    X coeff.  
 -----

|            |          |
|------------|----------|
| 153 => 162 | 0.11171  |
| 155 => 162 | 0.13658  |
| 157 => 162 | 0.12564  |
| 159 => 163 | -0.20913 |
| 160 => 162 | -0.15485 |
| 160 => 164 | -0.62640 |
| 161 => 167 | -0.64339 |

Transition dipole moment (debye):  
X= -0.0210 Y= 0.0096 Z= -0.1110 Tot= 0.1134

Oscillator strength, f= 0.0002

-----  
Restricted Singlet Excited State 7:  
-----

Excitation energy = 0.1576665453 hartrees 4.29032499 eV  
288.99 nm

excitation X coeff.  
-----

156 => 162 0.12797  
156 => 164 0.17922  
158 => 162 -0.18845  
158 => 164 -0.24693  
159 => 172 -0.26144  
161 => 172 0.83657  
161 => 173 0.13646

Transition dipole moment (debye):  
X= 0.1659 Y= 0.2426 Z= 0.8922 Tot= 0.9393

Oscillator strength, f= 0.0144

-----  
Restricted Singlet Excited State 8:  
-----

Excitation energy = 0.1639856633 hartrees 4.46227694 eV  
277.85 nm

excitation X coeff.  
-----

153 => 162 0.28491  
153 => 163 -0.37843  
154 => 162 -0.30686  
156 => 162 -0.21767  
157 => 162 -0.20639  
157 => 163 0.29321  
158 => 162 -0.22102  
159 => 162 -0.22225  
159 => 178 -0.10936  
160 => 163 -0.19023  
160 => 165 0.13196  
160 => 166 -0.13045  
160 => 179 -0.21189  
161 => 165 0.13800  
161 => 166 -0.22731  
161 => 178 -0.21388  
161 => 179 -0.15167

Transition dipole moment (debye):  
X= 0.5237 Y= 0.9425 Z= 0.5429 Tot= 1.2072

Oscillator strength, f= 0.0247

-----  
Restricted Singlet Excited State 9:  
-----

Excitation energy = 0.1643632826 hartrees 4.47255248 eV  
277.21 nm

excitation X coeff.  
-----

153 => 162 0.29885

153 => 163 0.10513  
154 => 162 0.26782  
154 => 163 0.40433  
156 => 162 0.10166  
156 => 163 0.19691  
157 => 162 -0.33681  
157 => 163 -0.16617  
158 => 162 0.10616  
158 => 163 0.19084  
159 => 162 0.13755  
159 => 163 0.10301  
160 => 163 0.12226  
160 => 166 -0.19036  
160 => 178 -0.22721  
161 => 165 0.29264  
161 => 178 0.15444  
161 => 179 -0.20671

Transition dipole moment (debye):  
X= -0.1105 Y= -0.6100 Z= -0.3137 Tot= 0.6948

Oscillator strength, f= 0.0082

-----  
Restricted Singlet Excited State 10:  
-----

Excitation energy = 0.1646015199 hartrees 4.47903525 eV  
276.81 nm

excitation X coeff.  
-----

152 => 162 0.14981  
153 => 163 -0.22077  
154 => 162 -0.19915  
155 => 163 -0.33781  
157 => 163 -0.18167  
159 => 162 0.54968  
160 => 163 0.46837  
160 => 165 0.11723  
160 => 167 -0.11811  
160 => 179 -0.10813  
161 => 162 0.19391  
161 => 166 -0.18589  
161 => 178 -0.17658

Transition dipole moment (debye):  
X= 0.5967 Y= 1.0382 Z= -0.4274 Tot= 1.2714

Oscillator strength, f= 0.0275

-----  
Restricted Singlet Excited State 11:  
-----

Excitation energy = 0.1655808997 hartrees 4.50568553 eV  
275.17 nm

excitation X coeff.  
-----

153 => 162 -0.13680  
154 => 163 -0.13119  
157 => 162 0.24965  
158 => 163 -0.10969  
159 => 163 -0.21221  
159 => 165 0.17741  
160 => 162 -0.14799  
160 => 166 -0.38713  
161 => 165 0.60385  
161 => 167 0.10061

161 => 168 -0.33178  
161 => 181 0.10996

Transition dipole moment (debye):  
X= -0.1412 Y= -0.1105 Z= -0.0130 Tot= 0.1798

Oscillator strength, f= 0.0006

-----  
Restricted Singlet Excited State 12:  
-----

Excitation energy = 0.1664462905 hartrees 4.52923401 eV  
273.74 nm

| excitation | X coeff. |
|------------|----------|
| 153 => 163 | -0.18369 |
| 154 => 162 | -0.16885 |
| 156 => 162 | -0.12386 |
| 159 => 166 | 0.23527  |
| 160 => 165 | -0.47541 |
| 161 => 166 | 0.66480  |
| 161 => 170 | -0.11935 |
| 161 => 174 | -0.10727 |

Transition dipole moment (debye):  
X= 0.5805 Y= 0.6363 Z= 0.4309 Tot= 0.9630

Oscillator strength, f= 0.0159

-----  
Restricted Singlet Excited State 13:  
-----

Excitation energy = 0.1669482047 hartrees 4.54289179 eV  
272.92 nm

| excitation | X coeff. |
|------------|----------|
| 152 => 163 | 0.17246  |
| 153 => 162 | -0.14236 |
| 155 => 162 | -0.44314 |
| 156 => 163 | -0.15356 |
| 159 => 163 | 0.52103  |
| 160 => 162 | 0.35109  |
| 161 => 163 | 0.10231  |
| 161 => 165 | 0.13329  |
| 161 => 167 | -0.39908 |
| 161 => 168 | -0.18811 |

Transition dipole moment (debye):  
X= -0.0766 Y= 0.0315 Z= 0.1036 Tot= 0.1327

Oscillator strength, f= 0.0003

-----  
Restricted Singlet Excited State 14:  
-----

Excitation energy = 0.1690131162 hartrees 4.59908089 eV  
269.58 nm

| excitation | X coeff. |
|------------|----------|
| 153 => 163 | 0.15508  |
| 154 => 162 | 0.16933  |
| 155 => 163 | -0.25091 |
| 156 => 162 | -0.38255 |
| 157 => 163 | 0.37511  |

157 => 167 -0.12806  
158 => 162 -0.42834  
158 => 164 -0.15301  
159 => 162 0.19710  
159 => 164 0.19201  
160 => 163 0.11319  
160 => 167 0.22711  
161 => 168 0.15572  
161 => 178 0.19273  
161 => 182 -0.13636  
161 => 184 -0.11309

Transition dipole moment (debye):  
X= -0.6226 Y= -0.8703 Z= -0.5265 Tot= 1.1926

Oscillator strength, f= 0.0248

-----  
Restricted Singlet Excited State 15:  
-----

Excitation energy = 0.1696694397 hartrees 4.61694036 eV  
268.54 nm

| excitation | X coeff. |
|------------|----------|
| 155 => 162 | 0.11105  |
| 156 => 163 | 0.12618  |
| 157 => 162 | -0.19465 |
| 158 => 162 | -0.10293 |
| 158 => 163 | 0.11972  |
| 159 => 165 | -0.15052 |
| 160 => 166 | 0.23169  |
| 160 => 170 | 0.11904  |
| 160 => 174 | 0.10711  |
| 161 => 165 | -0.20442 |
| 161 => 168 | -0.73143 |
| 161 => 171 | -0.11123 |
| 161 => 181 | 0.12764  |
| 161 => 186 | 0.14097  |

Transition dipole moment (debye):  
X= -0.2821 Y= -0.4773 Z= -0.2175 Tot= 0.5956

Oscillator strength, f= 0.0062

-----  
Restricted Singlet Excited State 16:  
-----

Excitation energy = 0.1715312425 hartrees 4.66760259 eV  
265.63 nm

| excitation | X coeff. |
|------------|----------|
| 153 => 162 | -0.31870 |
| 154 => 163 | -0.31316 |
| 155 => 162 | 0.23493  |
| 155 => 164 | 0.10665  |
| 156 => 163 | 0.29073  |
| 156 => 167 | -0.10684 |
| 157 => 162 | -0.47455 |
| 157 => 164 | -0.11624 |
| 158 => 163 | 0.29635  |
| 159 => 179 | 0.11019  |
| 160 => 164 | -0.17918 |
| 160 => 166 | -0.10310 |
| 160 => 178 | 0.22324  |
| 161 => 165 | 0.10932  |
| 161 => 168 | 0.21492  |

161 => 177 0.11796  
161 => 179 0.18958

Transition dipole moment (debye):  
X= -0.1002 Y= 0.0907 Z= 0.0050 Tot= 0.1352

Oscillator strength, f= 0.0003

-----  
Restricted Singlet Excited State 17:  
-----

Excitation energy = 0.1761840478 hartrees 4.79421187 eV  
258.61 nm

| excitation | X coeff. |
|------------|----------|
| 155 => 162 | 0.14065  |
| 159 => 163 | -0.17367 |
| 159 => 167 | 0.23023  |
| 160 => 162 | -0.17276 |
| 160 => 164 | 0.66141  |
| 161 => 163 | -0.18841 |
| 161 => 167 | -0.54107 |

|            |          |
|------------|----------|
| 161 => 185 | -0.11706 |
| 161 => 194 | -0.10324 |
| 161 => 195 | 0.22873  |

Transition dipole moment (debye):  
X= -0.7018 Y= -0.5200 Z= -0.4317 Tot= 0.9743

Oscillator strength, f= 0.0174

-----  
Restricted Singlet Excited State 19:  
-----

Excitation energy = 0.1787346915 hartrees 4.86361841 eV 254.92 nm

| excitation | X coeff. |
|------------|----------|
| 144 => 163 | 0.10621  |
| 147 => 162 | -0.22819 |
| 147 => 163 | 0.16309  |
| 149 => 162 | -0.58960 |
| 149 => 163 | 0.58797  |
| 149 => 164 | 0.21096  |
| 149 => 167 | 0.12738  |
| 150 => 162 | 0.10384  |

Transition dipole moment (debye):  
X= -0.0302 Y= -0.0913 Z= 0.3139 Tot= 0.3283

Oscillator strength, f= 0.0020

-----  
Restricted Singlet Excited State 20:  
-----

Excitation energy = 0.1789567473 hartrees 4.86966086 eV 254.61 nm

| excitation | X coeff. |
|------------|----------|
| 147 => 162 | -0.16778 |
| 147 => 163 | -0.25243 |
| 148 => 162 | 0.51802  |
| 148 => 163 | 0.57664  |
| 148 => 164 | -0.19732 |
| 148 => 167 | 0.11601  |

Transition dipole moment (debye):  
X= 0.1032 Y= 0.0792 Z= 0.0702 Tot= 0.1478

Oscillator strength, f= 0.0004

-----  
Restricted Singlet Excited State 18:  
-----

Excitation energy = 0.1777519796 hartrees 4.83687746 eV  
256.33 nm

| excitation | X coeff. |
|------------|----------|
| 160 => 164 | 0.11105  |
| 160 => 168 | 0.25858  |
| 160 => 183 | -0.12602 |
| 160 => 188 | -0.13159 |
| 161 => 169 | -0.32135 |
| 161 => 170 | -0.43776 |
| 161 => 174 | -0.41391 |
| 161 => 175 | 0.32359  |
| 161 => 182 | 0.19650  |
| 161 => 184 | -0.19945 |

149 => 162 0.14885  
159 => 164 -0.13147  
160 => 167 -0.11751

Transition dipole moment (debye):

X= -0.1242 Y= -0.2367 Z= 0.8025 Tot= 0.8458

Oscillator strength, f= 0.0132

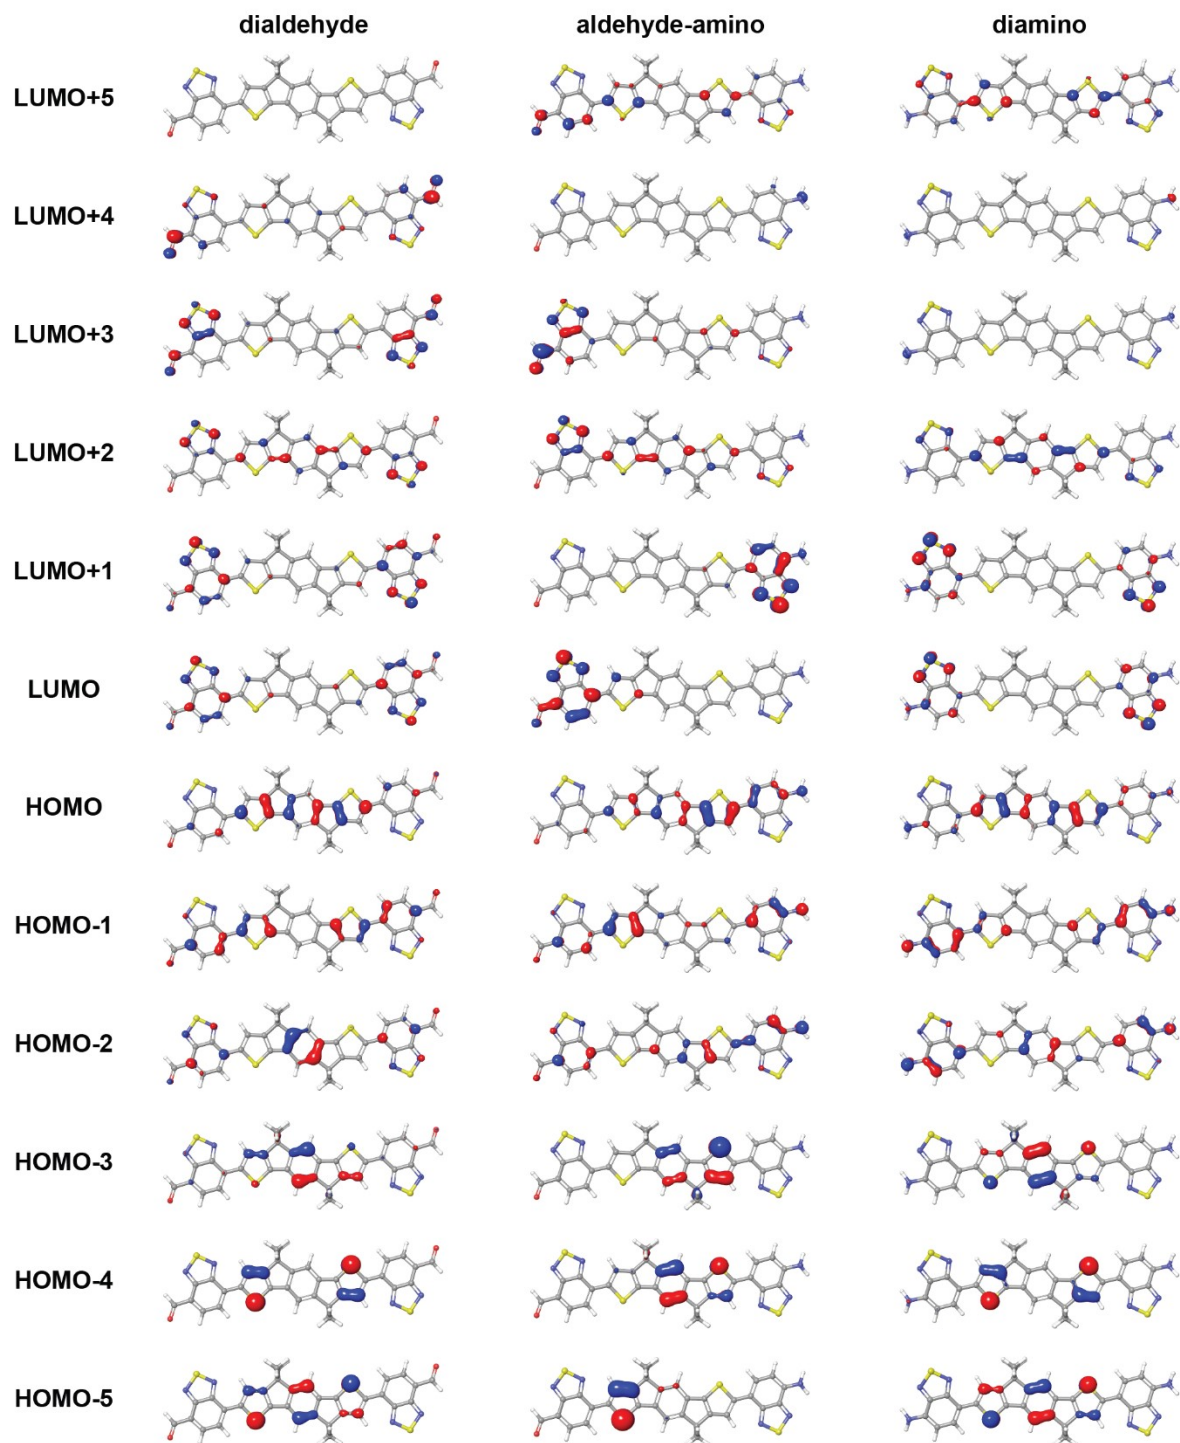

**Figure S24.** Frontier molecular orbitals levels (calculated at the CAM-B3LYP-D3/6-31G++\*\* level of theory) of the DFT-optimized models of dialdehyde-, aldehyde-amino-, and diamino-functionalized BT-IDT-BT degradation products. Orbital isosurfaces are illustrated at 0.05 electrons Bohr<sup>-3</sup>.



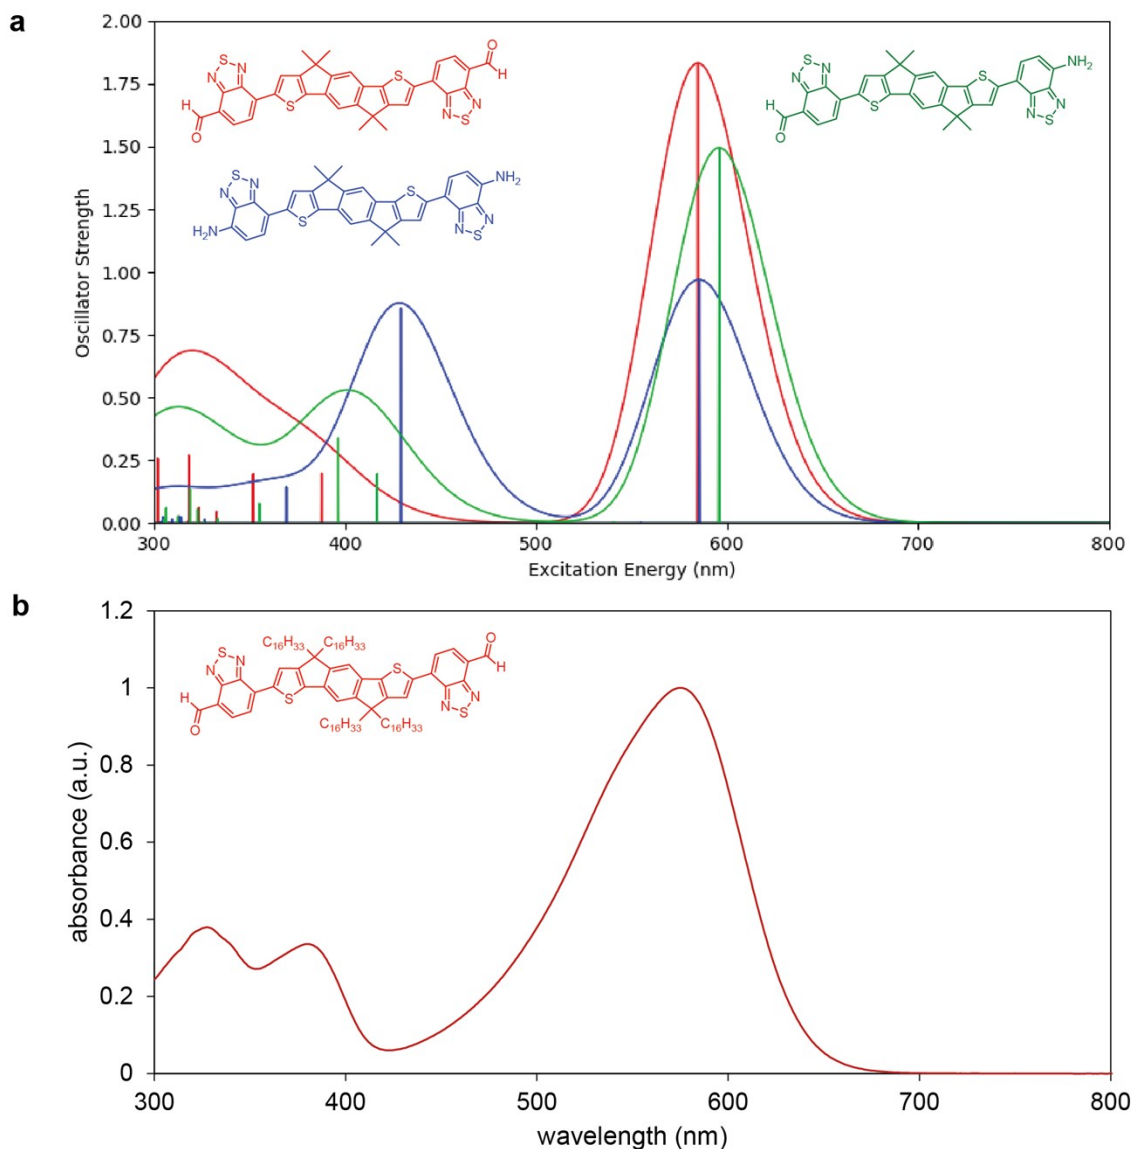

**Figure S25.** (a) Simulated UV-vis absorbance spectra of the models of BT-IDT-BT degradation products from TD-DFT (calculated at the CAM-B3LYP-D3/6-31G++\*\* level of theory). The alkyl chains on IDT were truncated to methyl groups to simplify the calculations. The spectra were rendered, without vibronic character, using Gaussian band-shapes (fwhm of 0 and 40 nm). The energies of the transitions were scaled by a factor of 1.13 relative to their assignments above (pages S22-36). (b) Experimental UV-vis absorbance spectrum of dialdehyde-functionalized BT-IDT-BT in THF (~0.01 mg/mL) used as reference for scaling.

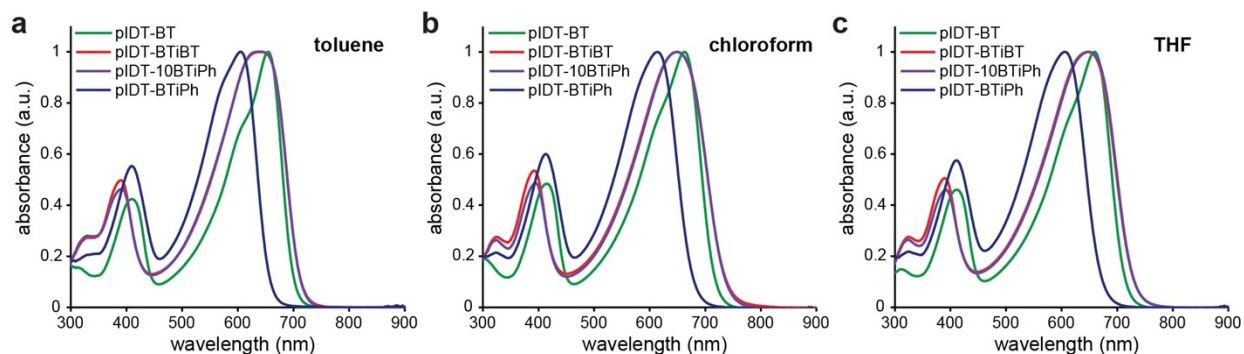

**Figure S26.** Normalized UV-vis absorption spectra for pIDT-BT, pIDT-BTiBT, pIDT-10BTiPh, and pIDT-BTiPh in (a) toluene, (b) chloroform, and (c) THF solutions (0.01 mg/mL).

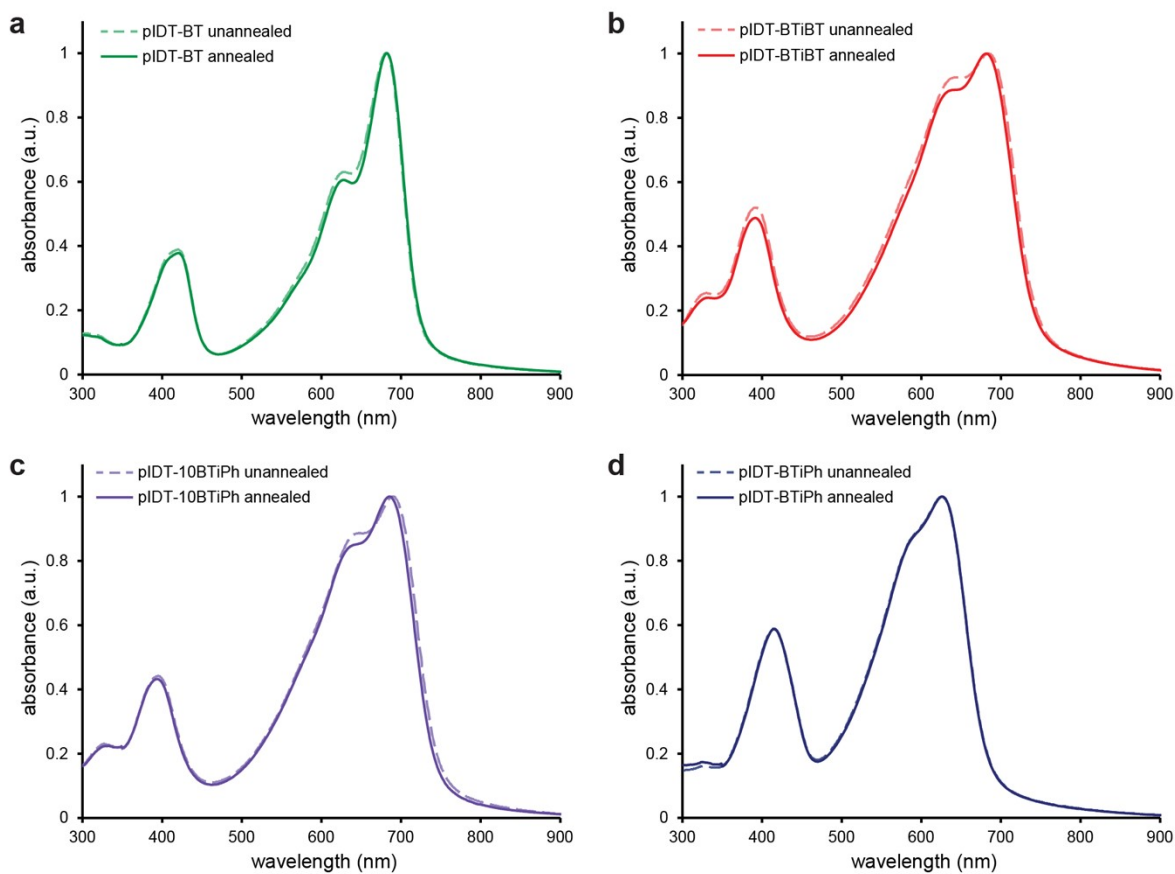

**Figure S27.** Normalized UV-vis absorption spectra of unannealed and annealed thin films for (a) pIDT-BT, (b) pIDT-BTiBT, (c) pIDT-10BTiPh, and (d) pIDT-BTiPh spincoated from chlorobenzene solution (10 mg/mL).

**Table S2.** Measured HOMO Energies by PESA and Calculated LUMO Energies

| polymer      | HOMO <sup>a</sup> (eV) | absorption onset <sup>b</sup> (nm) | optical band gap <sup>c</sup> (eV) | calculated LUMO <sup>d</sup> (eV) |
|--------------|------------------------|------------------------------------|------------------------------------|-----------------------------------|
| pIDT-BT      | -5.40                  | 729                                | 1.70                               | -3.70                             |
| pIDT-BTiBT   | -5.60                  | 745                                | 1.66                               | -3.66                             |
| pIDT-10BTiPh | -5.60                  | 748                                | 1.66                               | -3.66                             |
| pIDT-BTiPh   | -5.55                  | 688                                | 1.80                               | -3.75                             |

<sup>a</sup>Ionization potentials determined from the onset of photoemission in PESA. <sup>b</sup>Onset of absorption was taken from UV-vis spectra of polymer thin films spincoated onto glass substrates and annealed at 80 or 150 °C for 30 min. <sup>c</sup>Optical band gaps were calculated using the Tauc relation. <sup>d</sup>LUMO energies were estimated by subtracting optical band gap values from the corresponding HOMO energies.

**Table S3.** Relevant Crystallographic Parameters from GIXD

| polymer      | lamellar fwhm (Å <sup>-1</sup> ) <sup>a</sup> | lamellar CCL (Å) <sup>b</sup> | $\pi$ - $\pi$ fwhm (Å <sup>-1</sup> ) <sup>c</sup> | $\pi$ - $\pi$ CCL (Å) <sup>b,d</sup> | backbone fwhm (Å <sup>-1</sup> ) <sup>e</sup> | backbone CCL (Å) <sup>b</sup> |
|--------------|-----------------------------------------------|-------------------------------|----------------------------------------------------|--------------------------------------|-----------------------------------------------|-------------------------------|
| pIDT-BTiBT   | 0.04                                          | 168.7                         | 0.17                                               | 37.7                                 | 0.02                                          | 308.3                         |
| pIDT-10BTiPh | 0.04                                          | 156.0                         | 0.17                                               | 38.1                                 | 0.03                                          | 228.7                         |
| pIDT-BTiPh   | -                                             | -                             | 0.18                                               | 34.7                                 | -                                             | -                             |
| pIDT-BT      | 0.03                                          | 187.4                         | 0.21                                               | 29.8                                 | 0.02                                          | 327.9                         |

<sup>a</sup>Extracted from fitting the (100) diffraction peak. <sup>b</sup>Calculated based on the peak fwhm using the

Scherrer equation  $CCL = \frac{2\pi K}{fwhm}$ , where CCL = crystallite coherence length and K = shape factor = 1.0.<sup>5,6</sup> <sup>c</sup>Extracted from fitting the (010) diffraction peak. <sup>d</sup>Due to the overlapping scattering from the OTS surface modification as well as amorphous alkyl chains, the (010) peak was not deconvoluted. Therefore, we do not believe the  $\pi$ - $\pi$  fwhm and CCL values reported are accurate.

<sup>e</sup>Extracted from fitting the (002) diffraction peak.

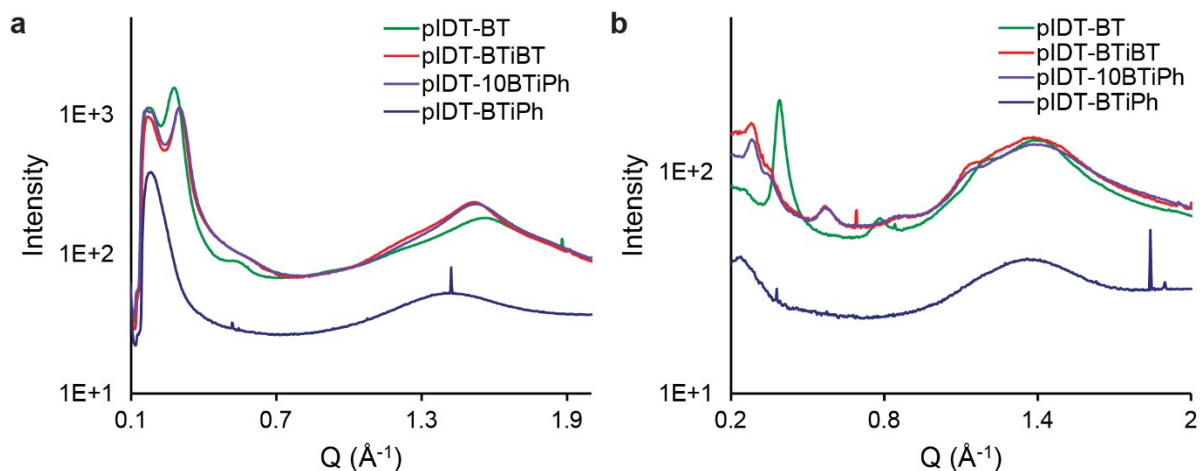

**Figure S28.** Integrated GIXD line profiles taken from cake segments drawn (a) out-of-plane (azimuthal angle,  $\chi = 0 \pm 30^\circ$ ) and (b) in-plane ( $\chi = 75 \pm 15^\circ$ ) for IDT-based polymers.

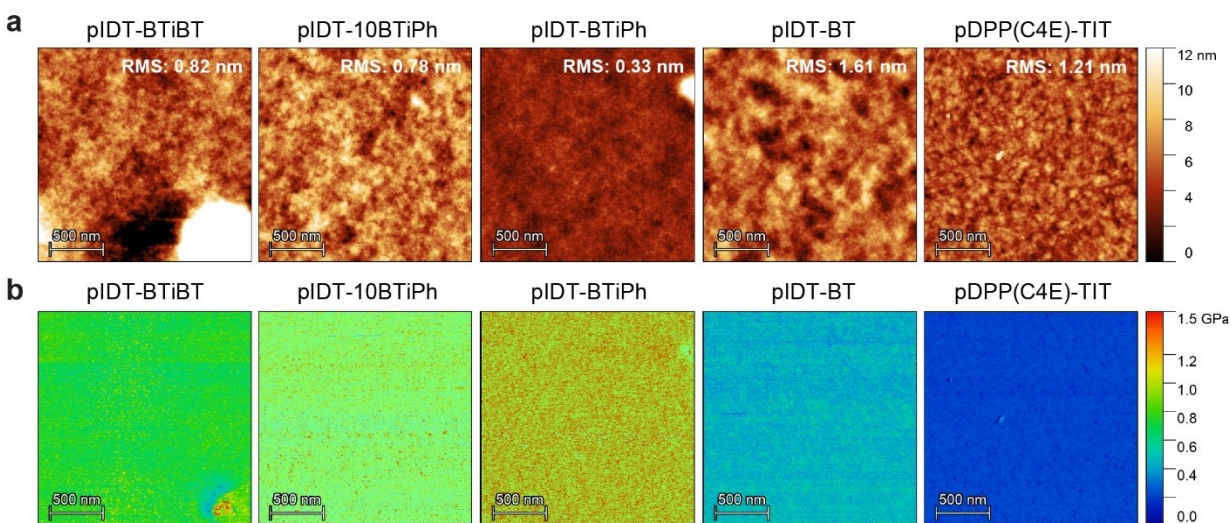

**Figure S29.** AFM (a) height and (b) DMT modulus images of degradable IDT and reference polymers spincoated from chlorobenzene solutions onto OTS-SiO<sub>2</sub> substrates after annealing for 30 min under nitrogen. For height images, root mean square (RMS) surface roughness values are shown. Large (> 500 nm) aggregates were omitted from calculated RMS roughness values.

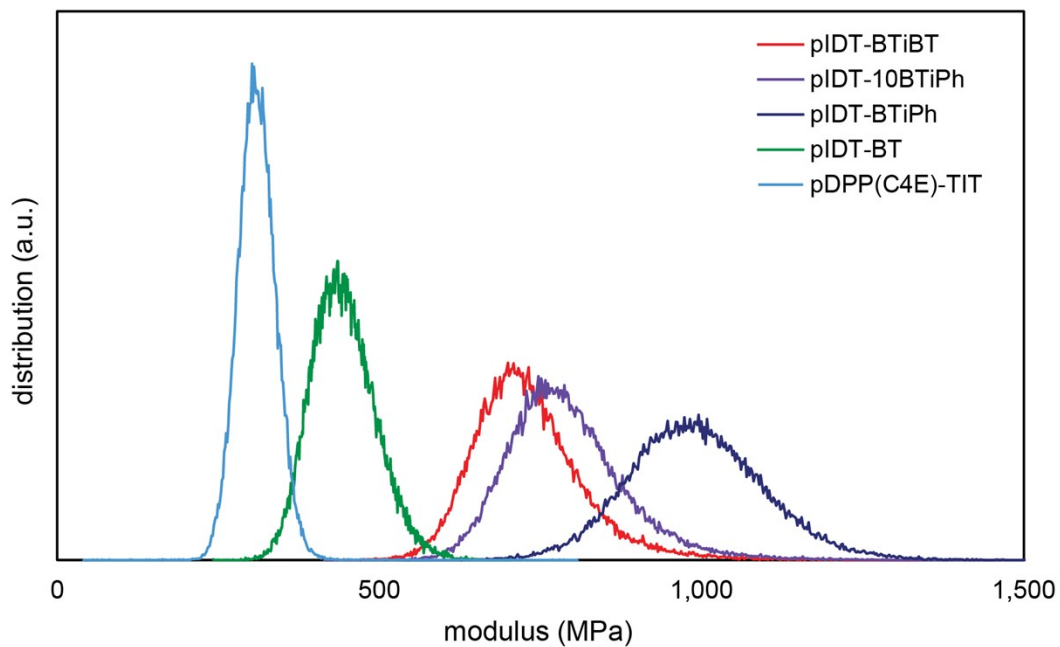

**Figure S30.** AFM-based DMT modulus distribution of degradable IDT and reference polymers.

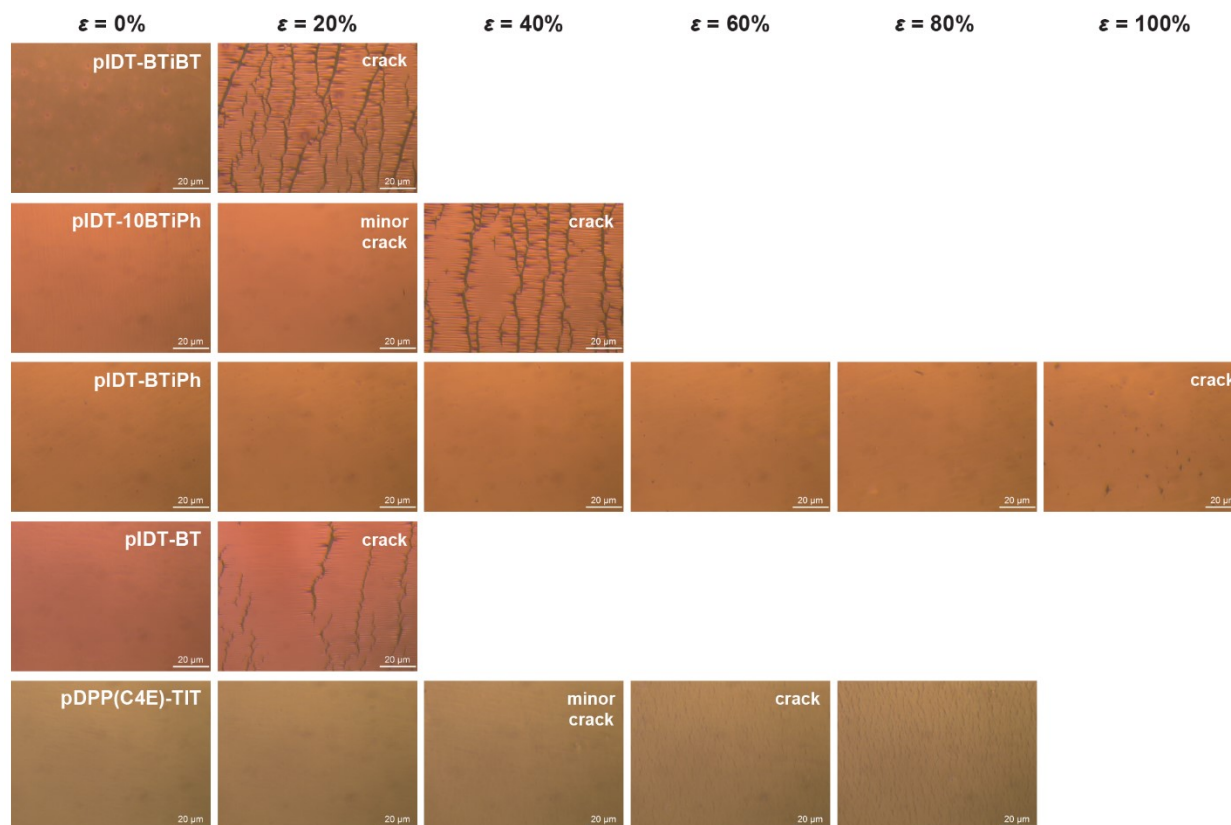

**Figure S31.** Optical microscope images of polymer films on PDMS elastomer at different strain ( $\epsilon$ ) values. Crack onset strain marked by “crack.”

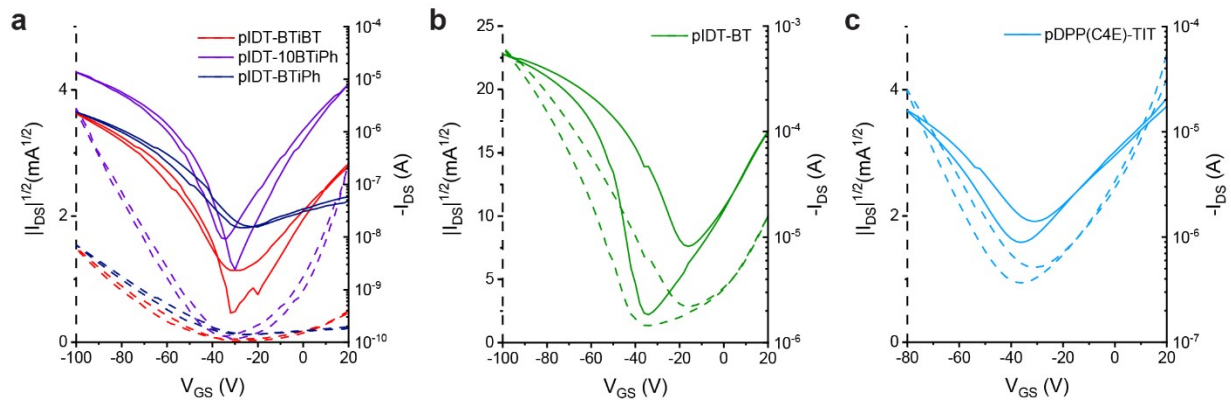

**Figure S32.** Representative TGBC transfer curves with dual sweep of  $V_{GS}$  for (a) degradable IDT-based polymers ( $V_{DS} = -100$  V), (b) pIDT-BT ( $V_{DS} = -100$  V), and (c) pDPP(C4E)-TIT ( $V_{DS} = -80$  V).

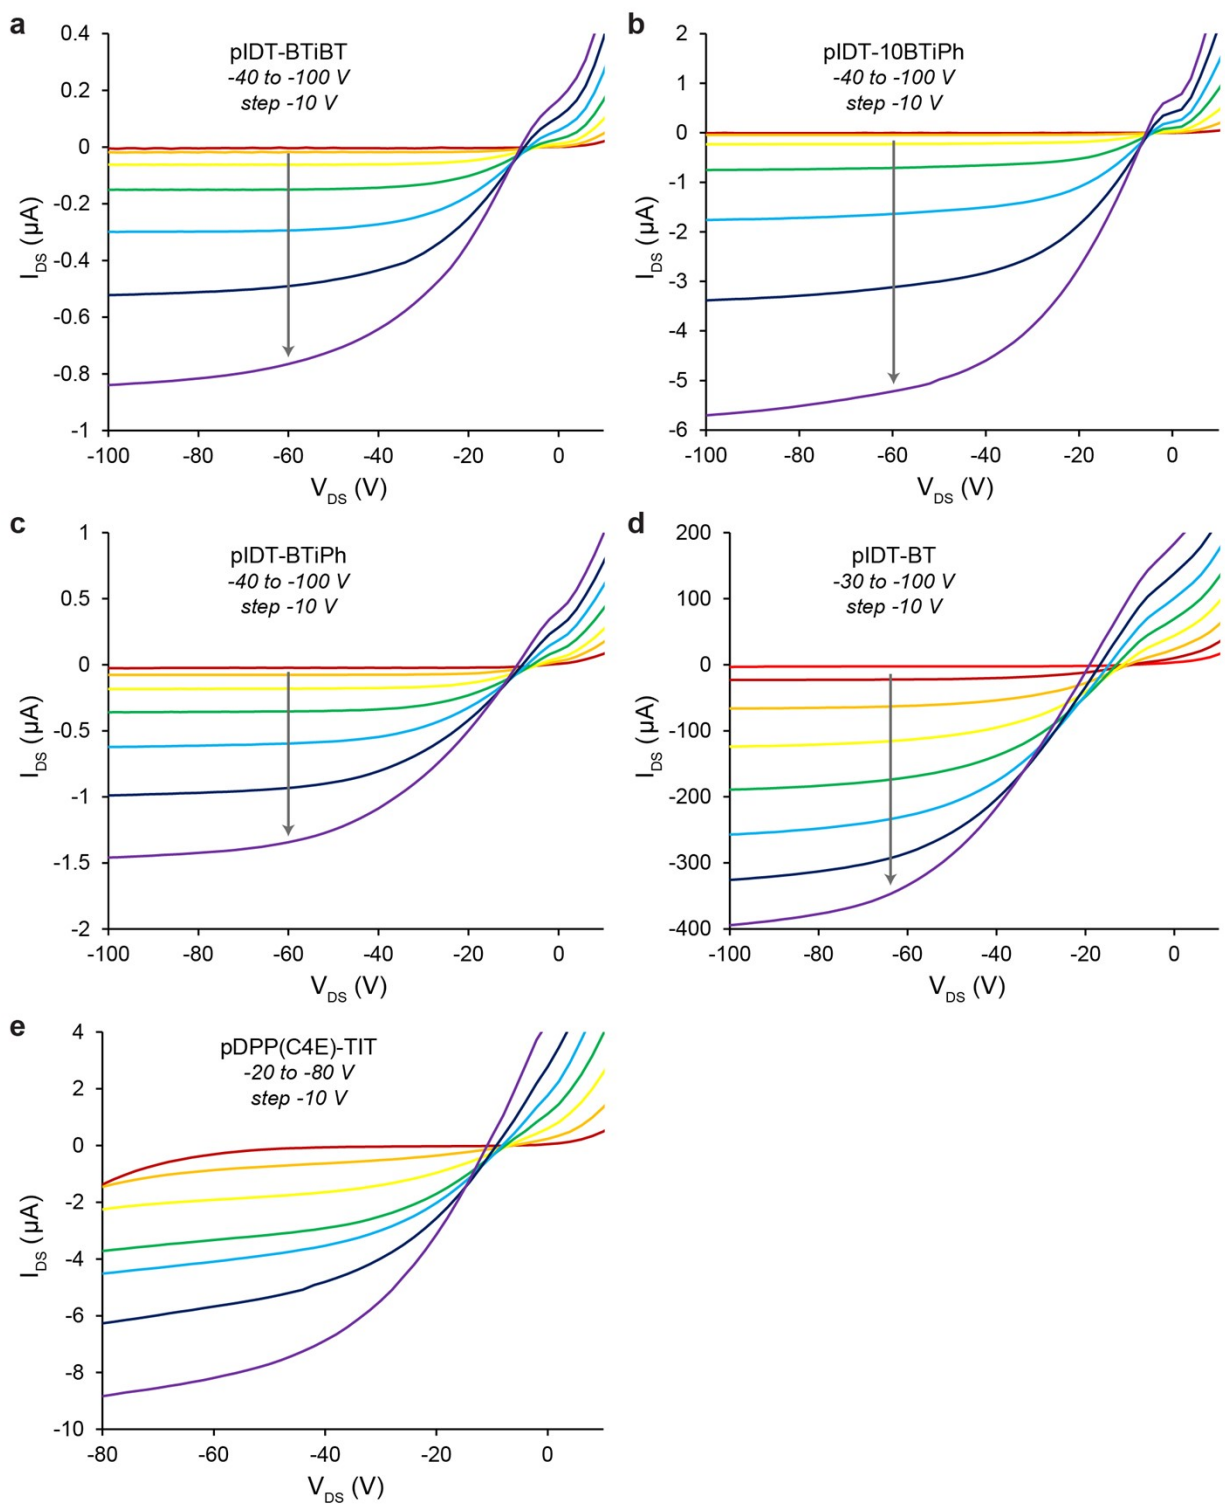

**Figure S33.** TGBC output curves for (a) pIDT-BTiBT, (b) pIDT-10BTiPh, (c) pIDT-BTiPh, (d) pIDT-BT, (e) pDPP(C4E)-TIT TGBC FETs.

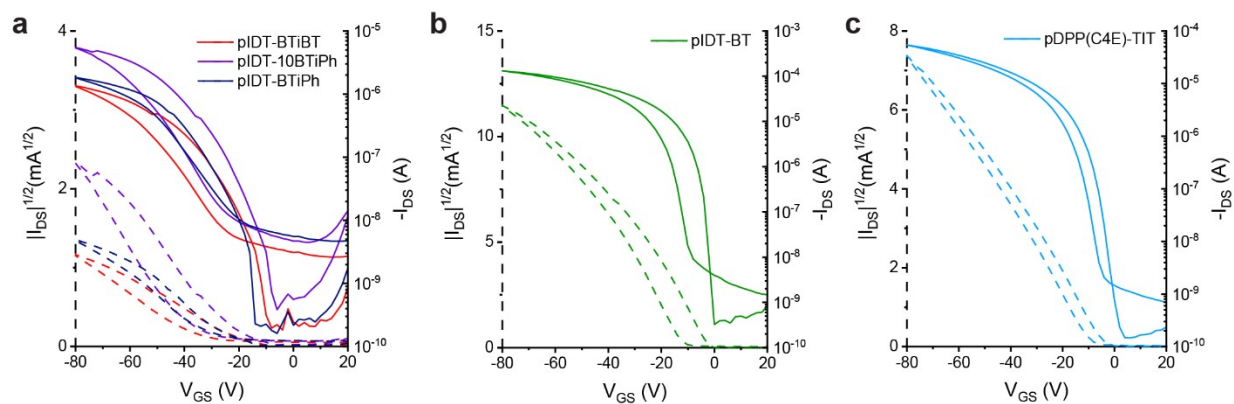

**Figure S34.** Representative BGTC transfer curves with dual sweep of  $V_{GS}$  for (a) degradable IDT-based polymers ( $V_{DS} = -80$  V), (b) pIDT-BT ( $V_{DS} = -80$  V), and (c) pDPP(C4E)-TIT ( $V_{DS} = -80$  V).

**Table S4.** CYTOP Dielectric Thicknesses

| batch | thickness (nm) <sup>a</sup> |
|-------|-----------------------------|
| 1     | 710 ± 10                    |
| 2     | 710 ± 30                    |
| 3     | 647 ± 7                     |

<sup>a</sup>Averaged from five different points on CYTOP dielectric.



**Table S5.** Extracted Parameters for FETs

| polymer       | BGTC configuration <sup>a</sup>                               |                                |           | TGBC configuration <sup>b</sup>                               |                                |           |
|---------------|---------------------------------------------------------------|--------------------------------|-----------|---------------------------------------------------------------|--------------------------------|-----------|
|               | $\mu_{\text{sat}}$<br>( $\text{cm}^2/\text{V}\cdot\text{s}$ ) | $I_{\text{on}}/I_{\text{off}}$ | $V_t$ (V) | $\mu_{\text{sat}}$<br>( $\text{cm}^2/\text{V}\cdot\text{s}$ ) | $I_{\text{on}}/I_{\text{off}}$ | $V_t$ (V) |
| pIDT-BTiBT    | $3.2 \pm 0.7 \text{ E-3}$                                     | $10^4$                         | -16.2     | $0.016 \pm 0.002$                                             | $10^4$                         | -45.8     |
| pIDT-10BTiPh  | $0.019 \pm 0.002$                                             | $10^4$                         | -19.7     | $0.08 \pm 0.01$                                               | $10^4$                         | -41.8     |
| pIDT-BTiPh    | $0.008 \pm 0.002$                                             | $10^4$                         | -19.9     | $0.010 \pm 0.002$                                             | $10^2$                         | -35.3     |
| pIDT-BT       | $0.52 \pm 0.02$                                               | $10^5$                         | -0.3      | $1.4 \pm 0.1$                                                 | $10^2$                         | -12.3     |
| pDPP(C4E)-TIT | $0.13 \pm 0.01$                                               | $10^5$                         | -0.2      | $0.04 \pm 0.03$                                               | $10^1$                         | -7.9      |

<sup>a</sup>11.5 nF/cm<sup>2</sup> was used as the capacitance for 300 nm SiO<sub>2</sub>. <sup>b</sup>Capacitance for CYTOP dielectric was calculated each batch from CYTOP thickness measurements. 2.6-2.9 nF/cm<sup>2</sup> was used as the

capacitance using  $C = \epsilon_0 \frac{A}{d}$ .

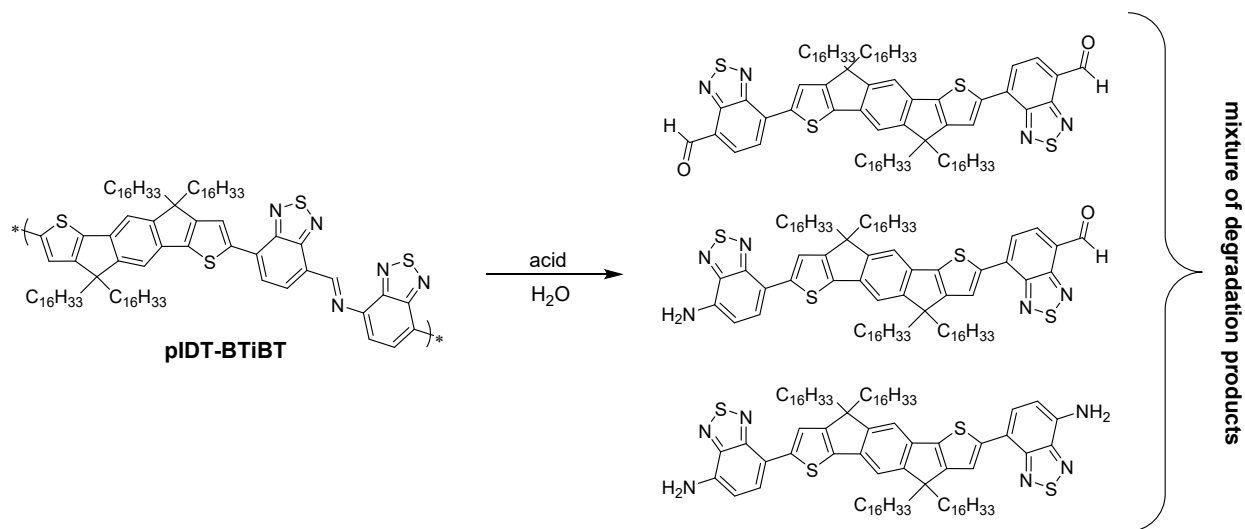**Figure S35.** Scheme for degradation of pIDT-BTiBT which produces a mixture of degradation products upon reaction with acid and water.

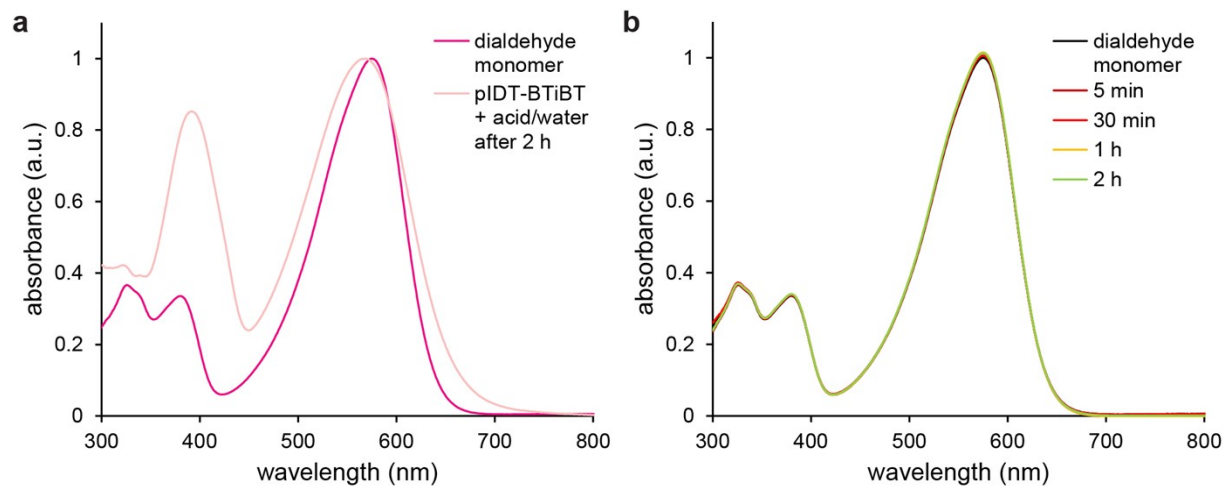

**Figure S36.** Experimental UV-vis spectra for (a) dialdehyde-functionalized BT-IDT-BT degradation product compared with pIDT-BTiBT after completely degraded in THF and (b) dialdehyde-functionalized BT-IDT-BT in THF solution with 150x molar excess of TFA and water.

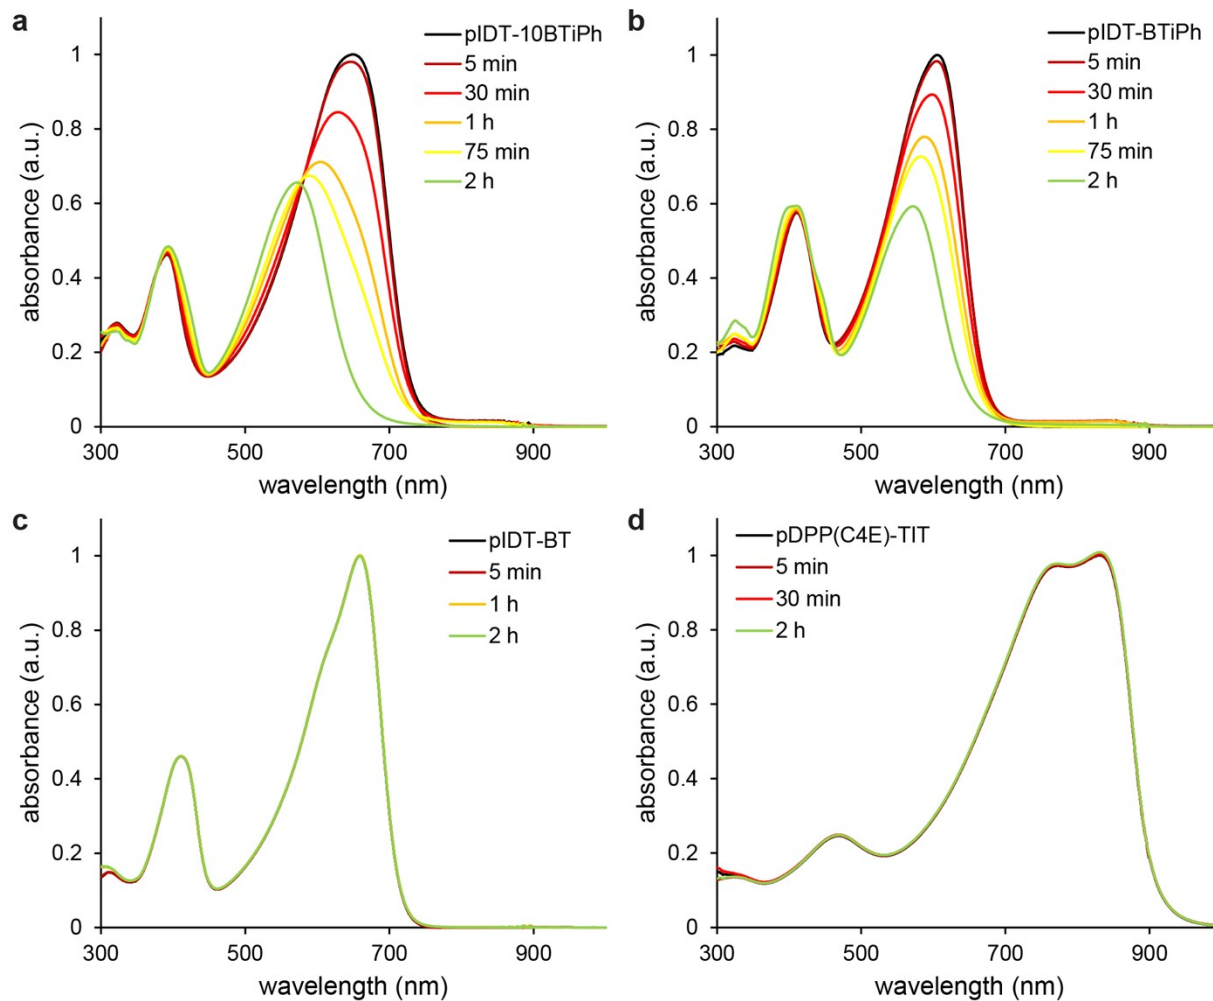

**Figure S37.** UV-vis spectra for (a) pIDT-10BTiPh, (b) pIDT-BTiPh, (c) pIDT-BT, and (d) pDPP(C4E)-TIT in THF solution with 150x molar excess of TFA and water.

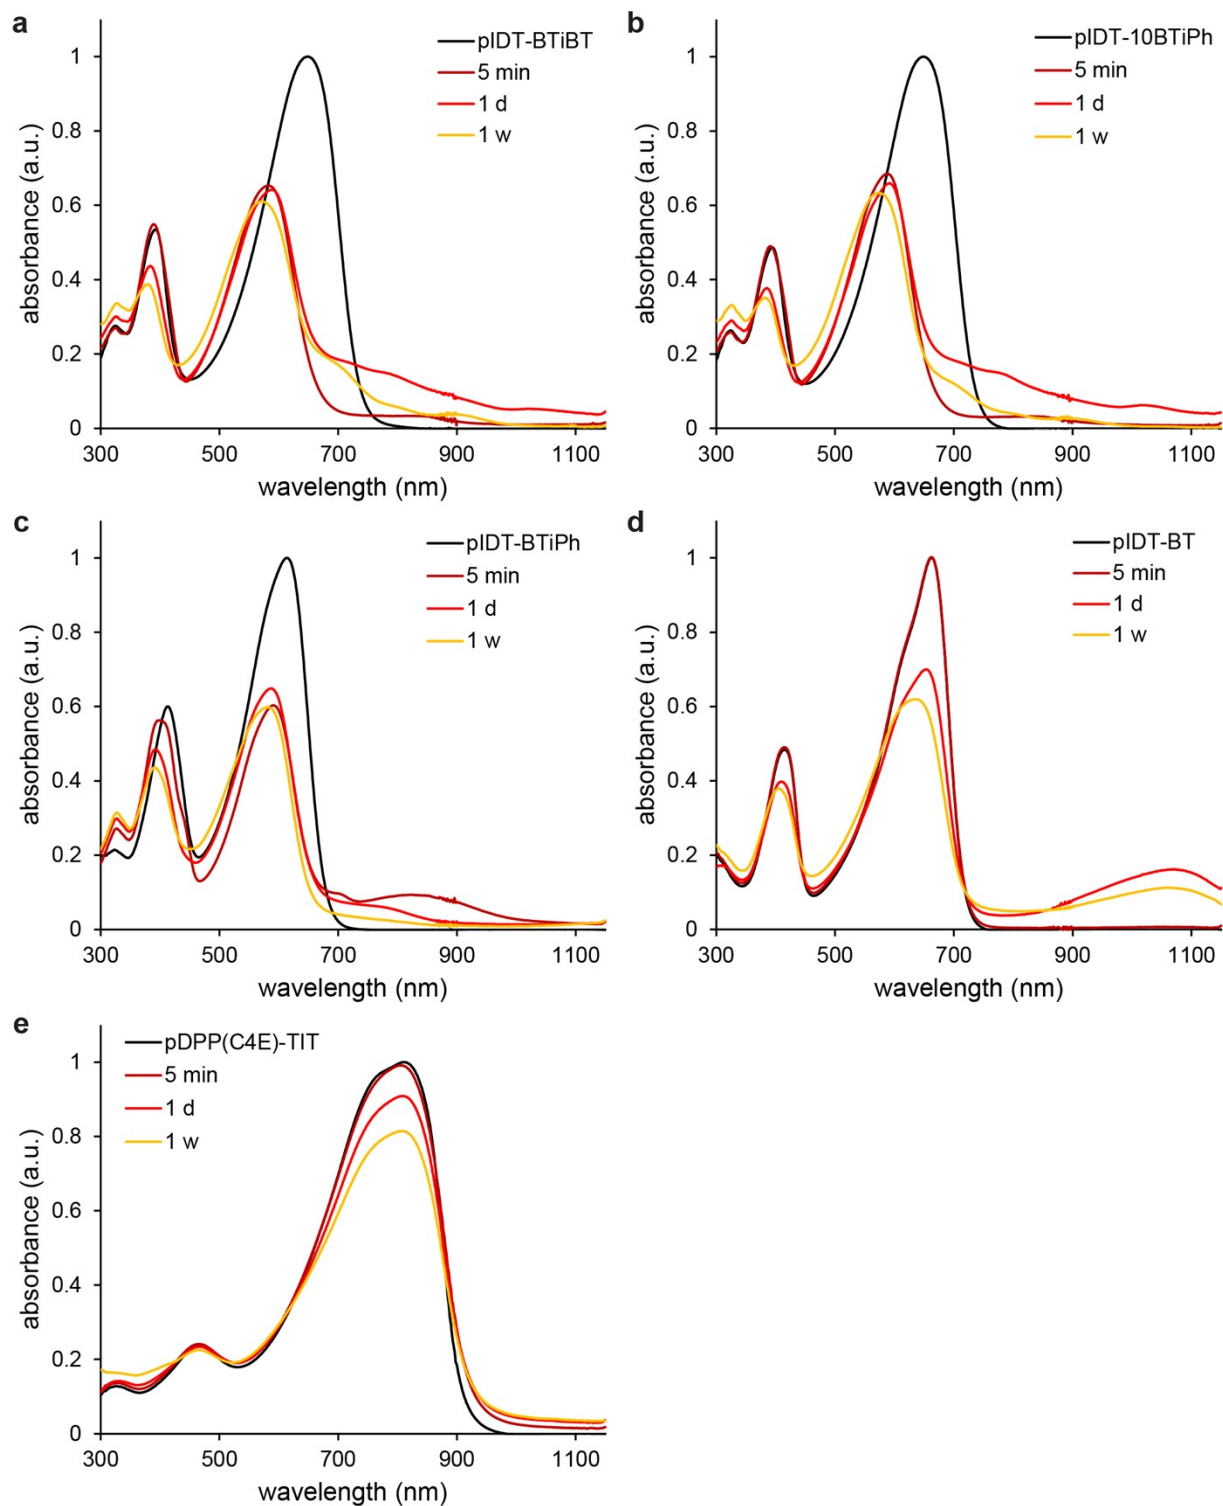

**Figure S38.** UV-vis spectra for (a) pIDT-BTiBT, (b) pIDT-10BTiPh, (c) pIDT-BTiPh, (d) pIDT-BT, and (e) pDPP(C4E)-TIT in chloroform solution with 150x molar excess of TFA and water.

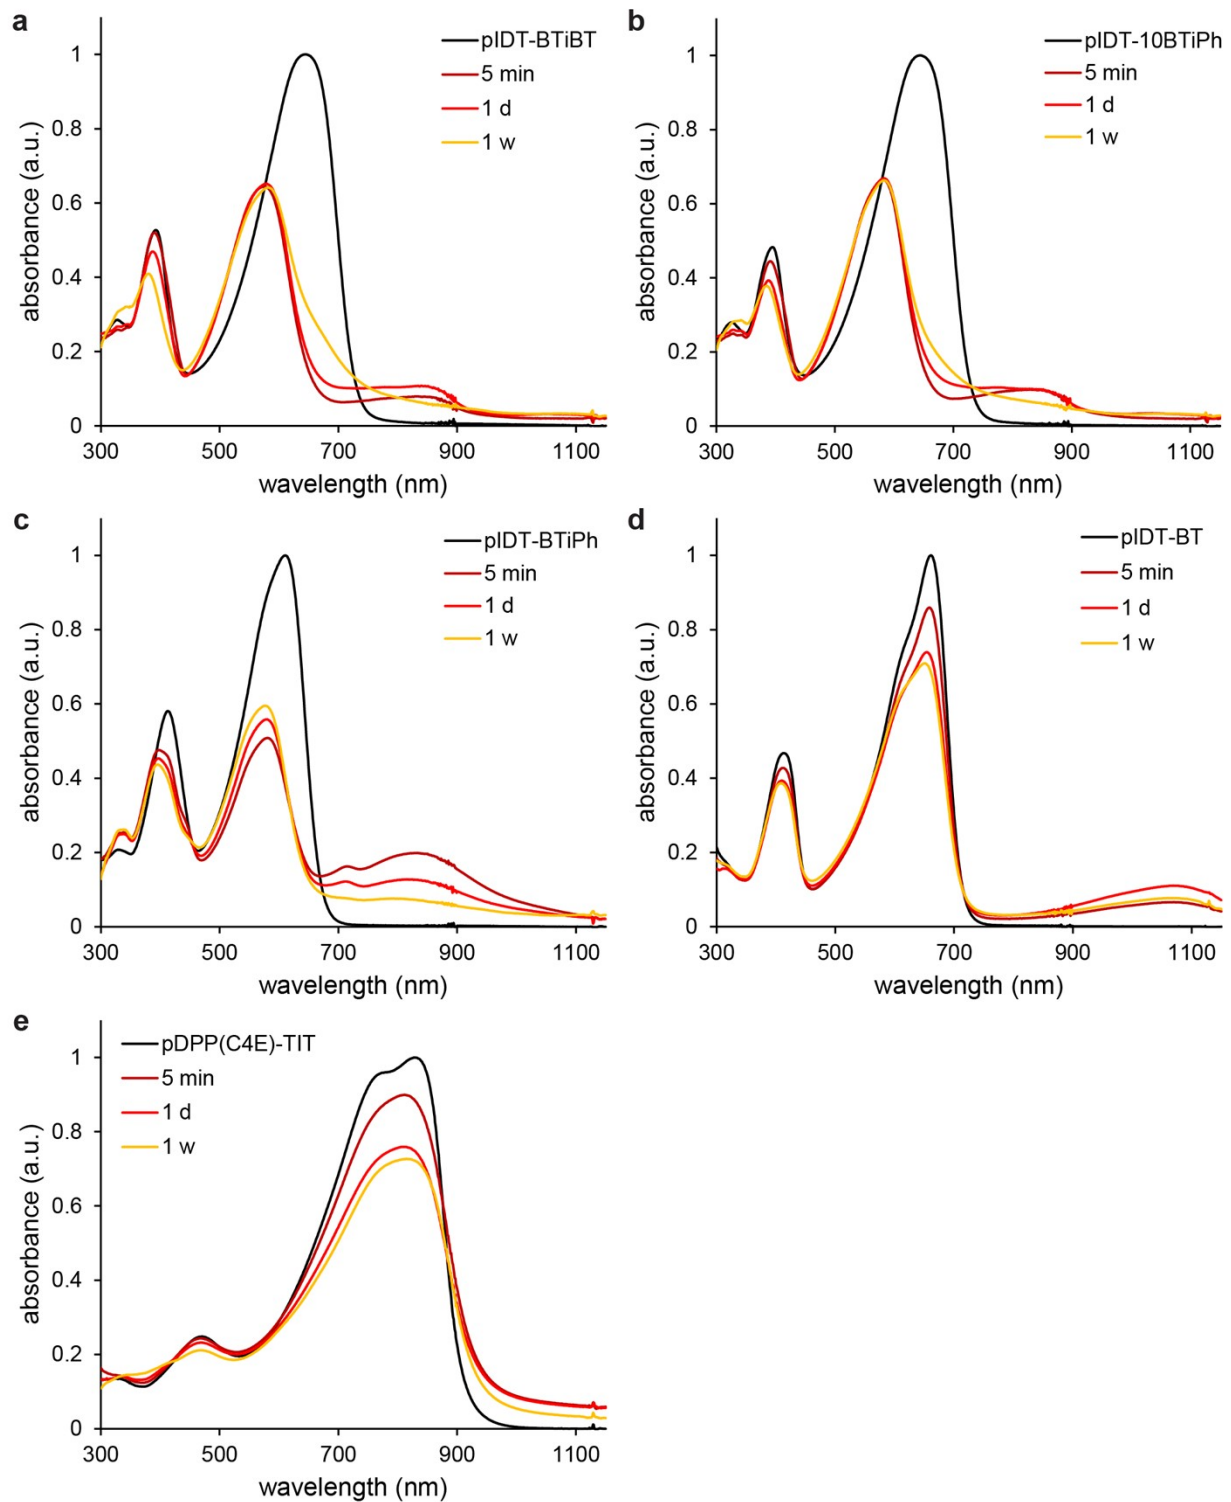

**Figure S39.** UV-vis spectra for (a) pIDT-BTiBT, (b) pIDT-10BTiPh, (c) pIDT-BTiPh, (d) pIDT-BT, and (e) pDPP(C4E)-TIT in chlorobenzene solution with 150x molar excess of TFA and water.

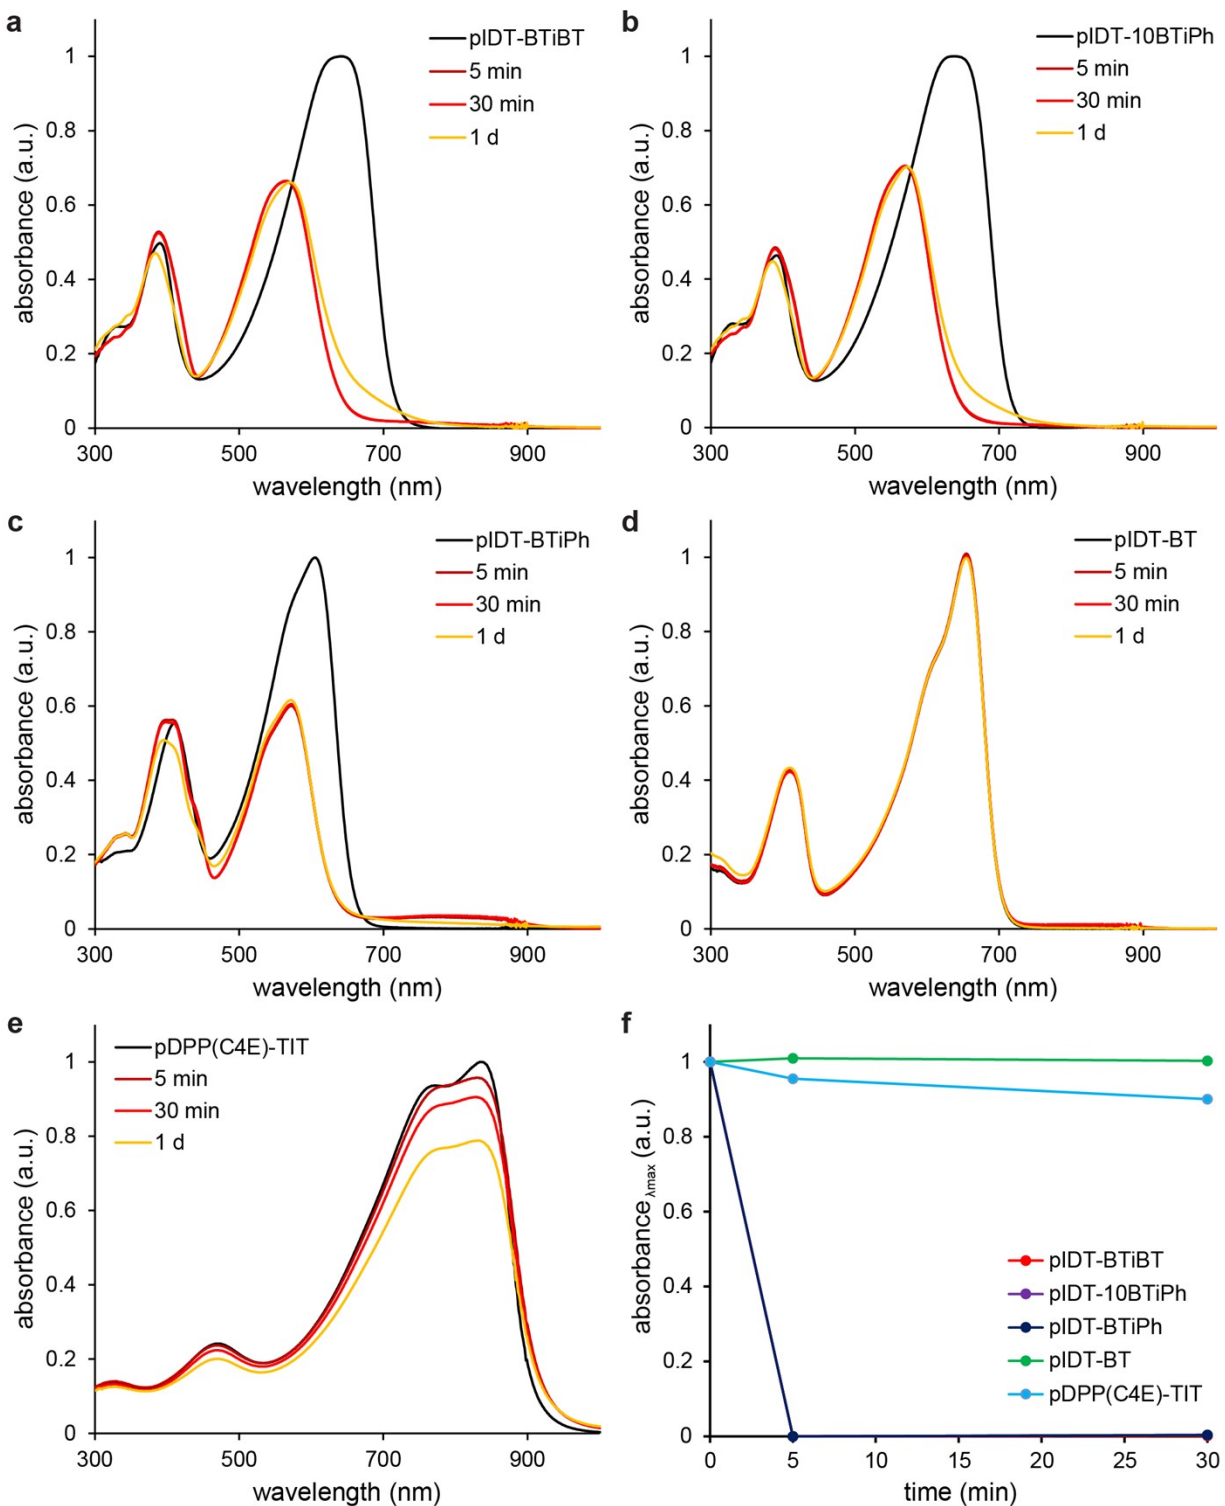

**Figure S40.** UV-vis spectra for (a) pIDT-BTiBT, (b) pIDT-10BTiPh, (c) pIDT-BTiPh, (d) pIDT-BT, and (e) pDPP(C4E)-TIT in toluene solution with 150x molar excess of TFA and water. (f) UV-vis absorption intensities at  $\lambda_{\max}$  are plotted over time for degradation of all polymers in toluene solution.

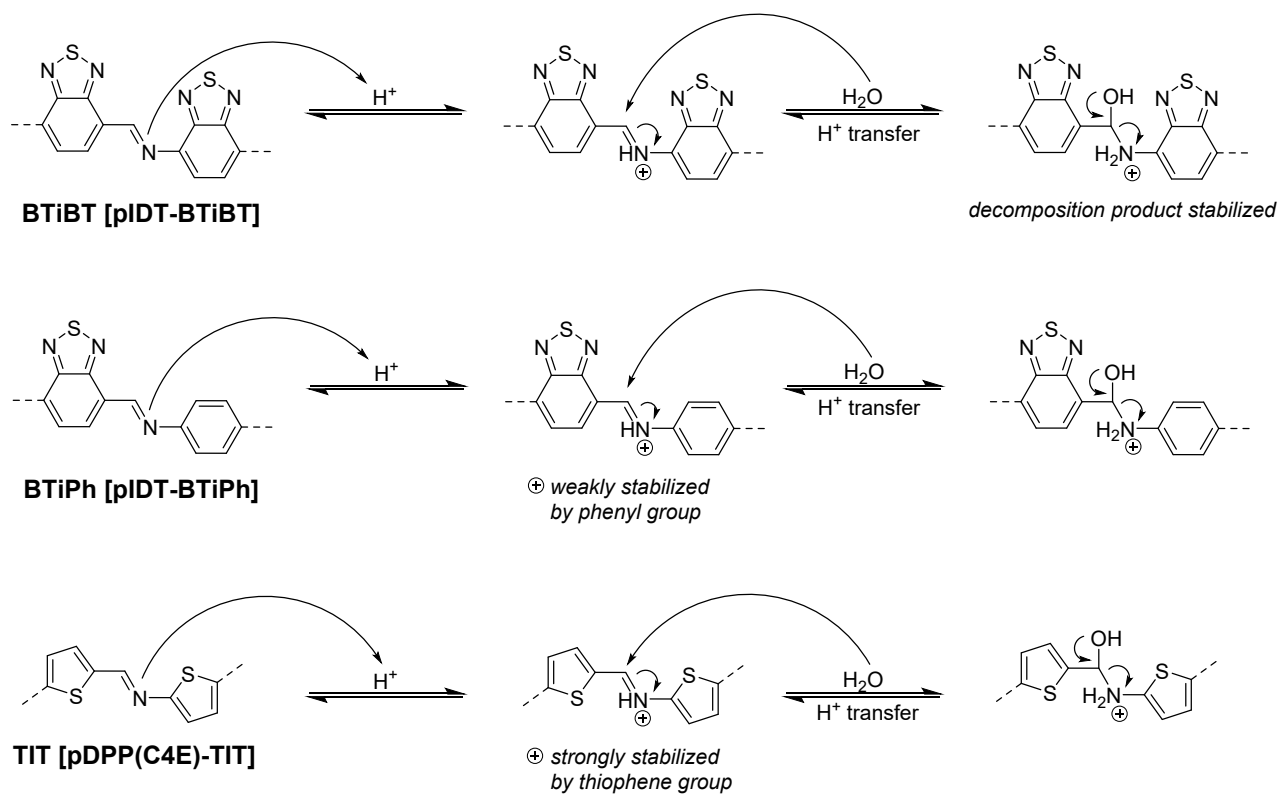

**Figure S41.** Proposed mechanisms for the imine hydrolysis of pIDT-BTiBT, pIDT-BTiPh, and pDPP(C4E)-TIT. The electronic effects of the hydrolytic attack and decomposition of the tetrahedral intermediate steps are noted.

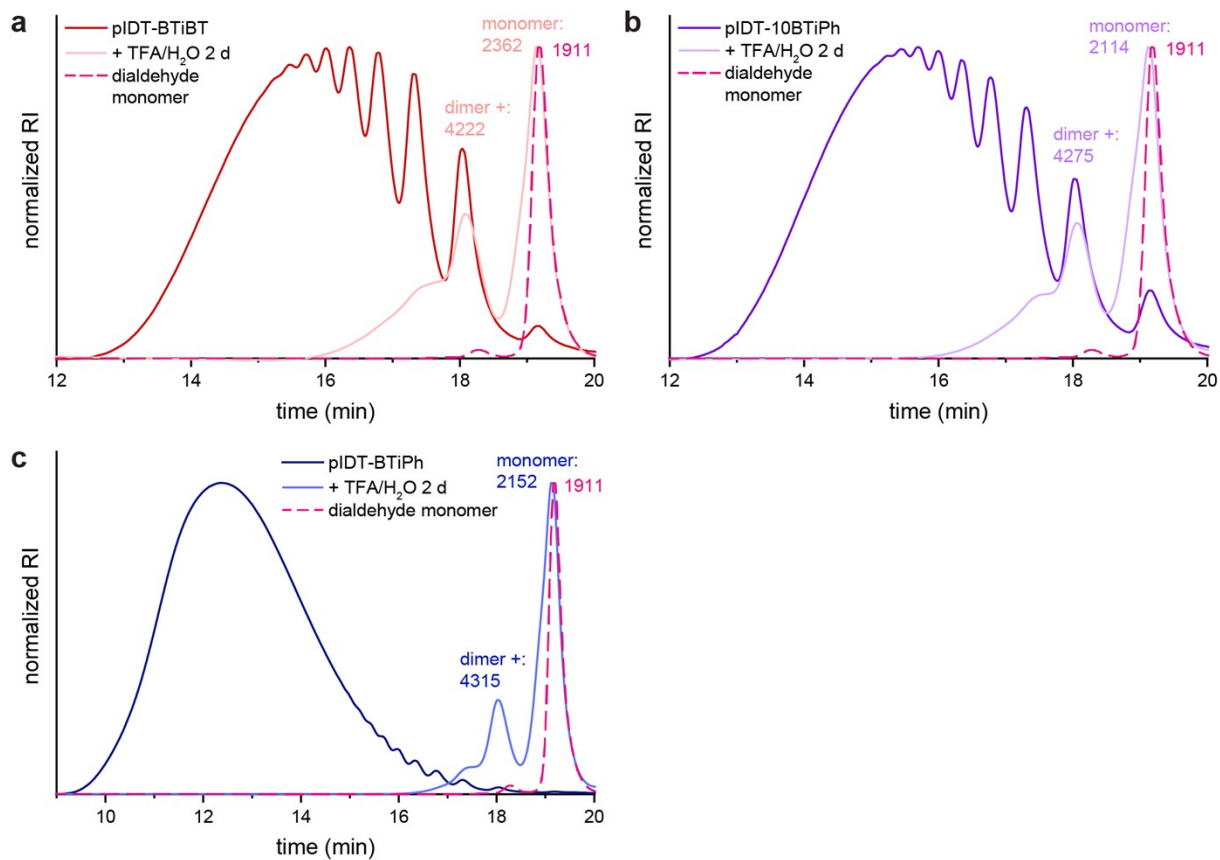

**Figure S42.** GPC chromatograms taken in THF at 40 °C for (a) pIDT-BTiBT, (b) pIDT-10BTiPh, and (c) pIDT-BTiPh before and after degradation in THF solution with 150x molar excess of TFA and water compared with that of synthesized dialdehyde-functionalized BT-IDT-BT. Calculated  $M_n$  values (kg/mol) are shown.



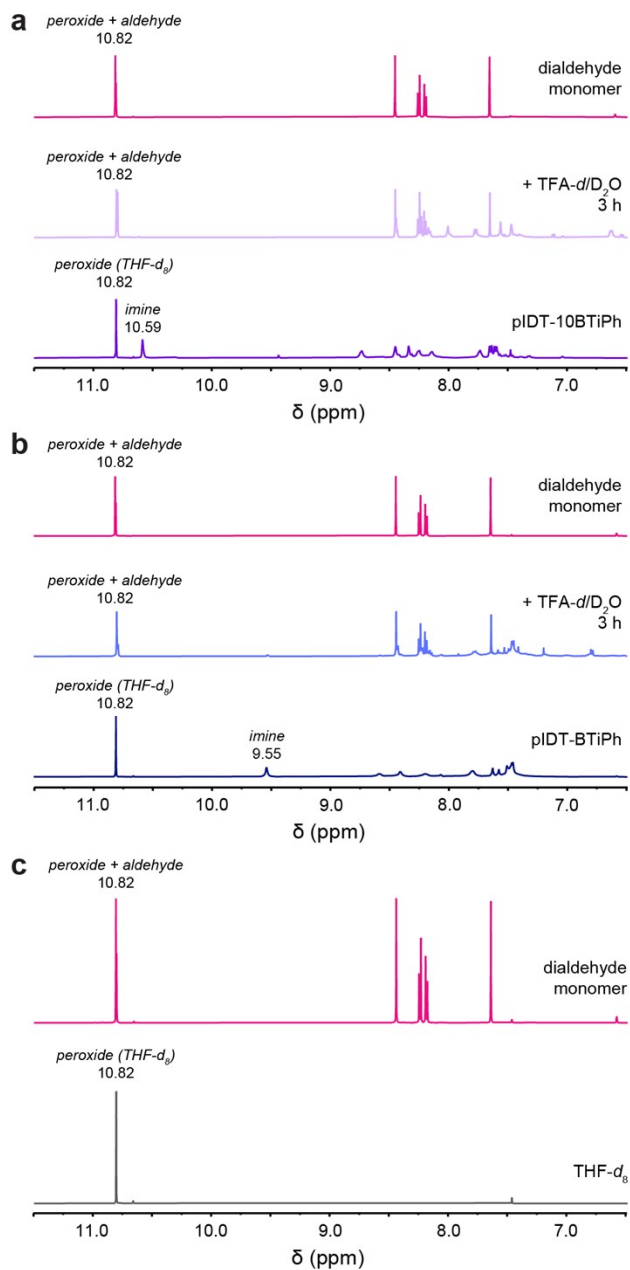

**Figure S43.** NMR degradation experiments of (a) pIDT-10BTiPh and (b) pIDT-BTiPh before and after degradation in THF-*d*<sub>8</sub> solution (~5 mg/mL) with 150x molar excess of TFA-*d* and D<sub>2</sub>O compared with that of synthesized dialdehyde-functionalized BT-IDT-BT. (c) NMR of the solvent THF-*d*<sub>8</sub> was taken to demonstrate the existence of the peroxide impurity that overlapped with the aldehyde peak of the degradation products.

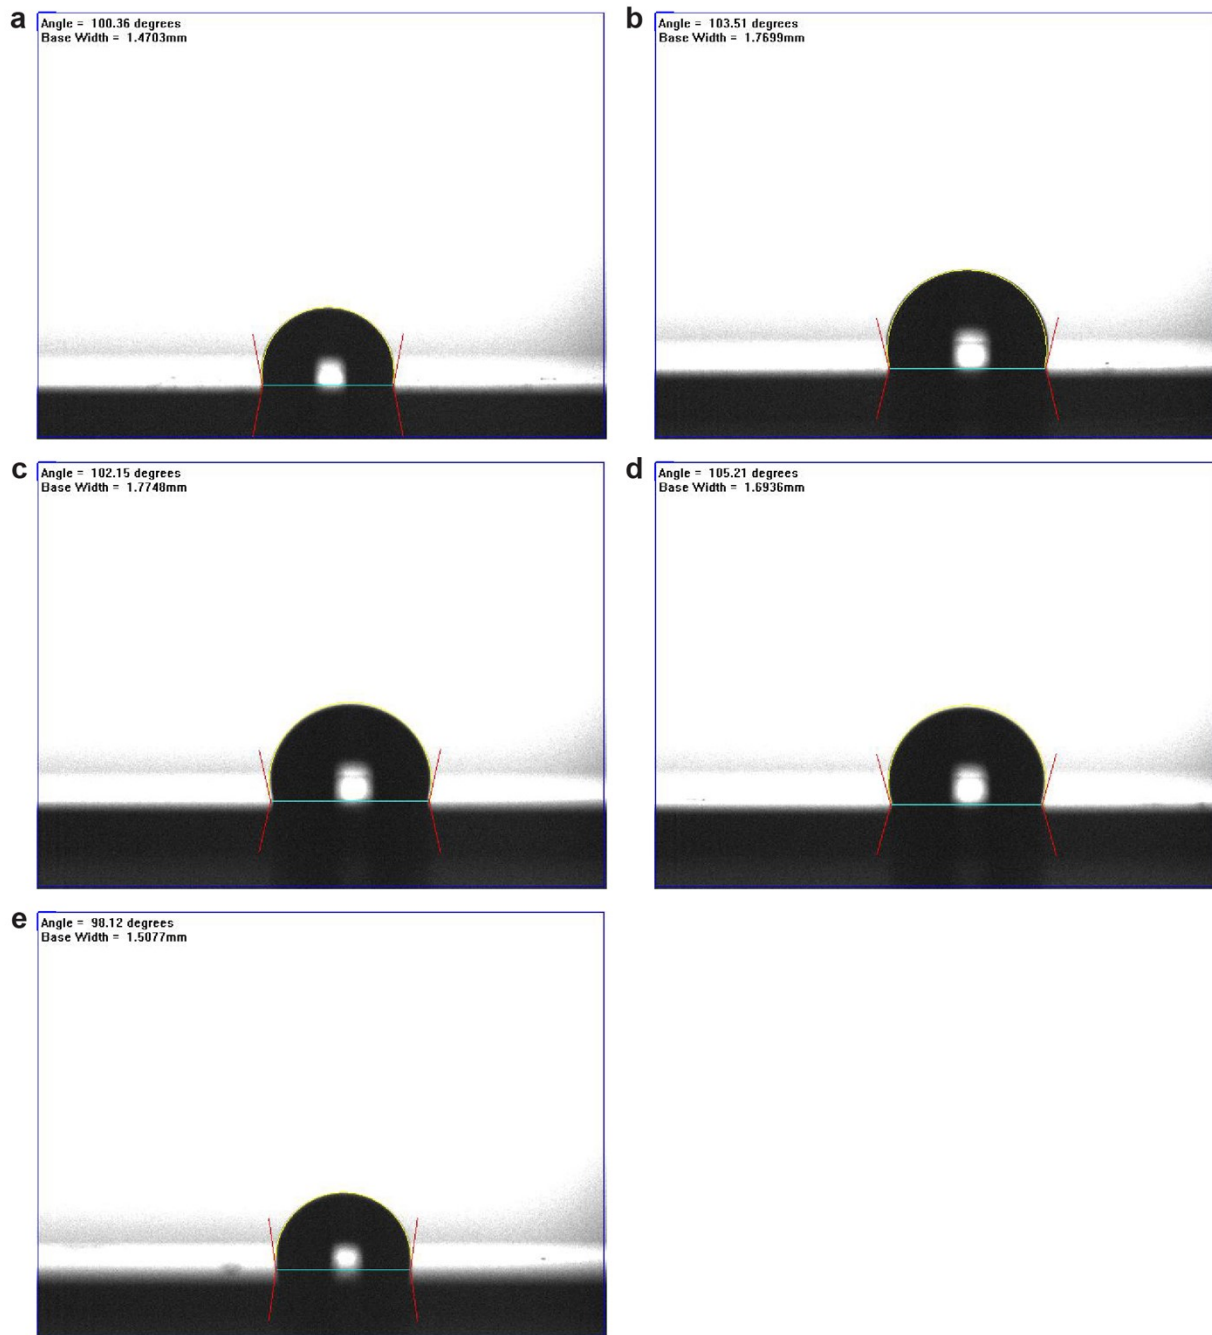

**Figure S43.** Contact angle measurements of (a) pIDT-BTiBT, (b) pIDT-10BTiPh (c) pIDT-BTiPh, (d) pIDT-BT, and (e) pDPP(C4E)-TIT thin films.

**Table S6.** Thicknesses of the Polymer Thin Films

| polymer       | trial 1 (nm) | trial 2 (nm) | trial 3 (nm) | average thickness (nm) <sup>a</sup> |
|---------------|--------------|--------------|--------------|-------------------------------------|
| pIDT-BTiBT    | 68.0         | 72.0         | 66.0         | 69 ± 3                              |
| pIDT-10BTiPh  | 74.5         | 67.5         | 69.9         | 71 ± 4                              |
| pIDT-BTiPh    | 67.1         | 66.0         | 67.1         | 66.7 ± 0.6                          |
| pIDT-BT       | 74.7         | 71.9         | 60.9         | 69 ± 7                              |
| pDPP(C4E)-TIT | 66.8         | 67.9         | 76.9         | 71 ± 6                              |

<sup>a</sup>Averaged from three different points on the polymer film.

**Table S7.** Average Contact Angle Measurements for Polymer Thin Films<sup>a</sup>

| polymer       | trial 1 (°) | trial 2 (°) | trial 3 (°) | average (°)   |
|---------------|-------------|-------------|-------------|---------------|
| pIDT-BTiBT    | 102.89      | 100.36      | 100.11      | 101 ± 1       |
| pIDT-10BTiPh  | 103.66      | 103.51      | 103.46      | 103.5 ± 0.1   |
| pIDT-BTiPh    | 102.15      | 101.18      | 102.72      | 102.0 ± 0.6   |
| pIDT-BT       | 105.21      | 105.23      | 105.16      | 105.20 ± 0.03 |
| pDPP(C4E)-TIT | 99.49       | 95.86       | 98.12       | 98 ± 2        |

<sup>a</sup>Distilled water was used for contact angle measurements.

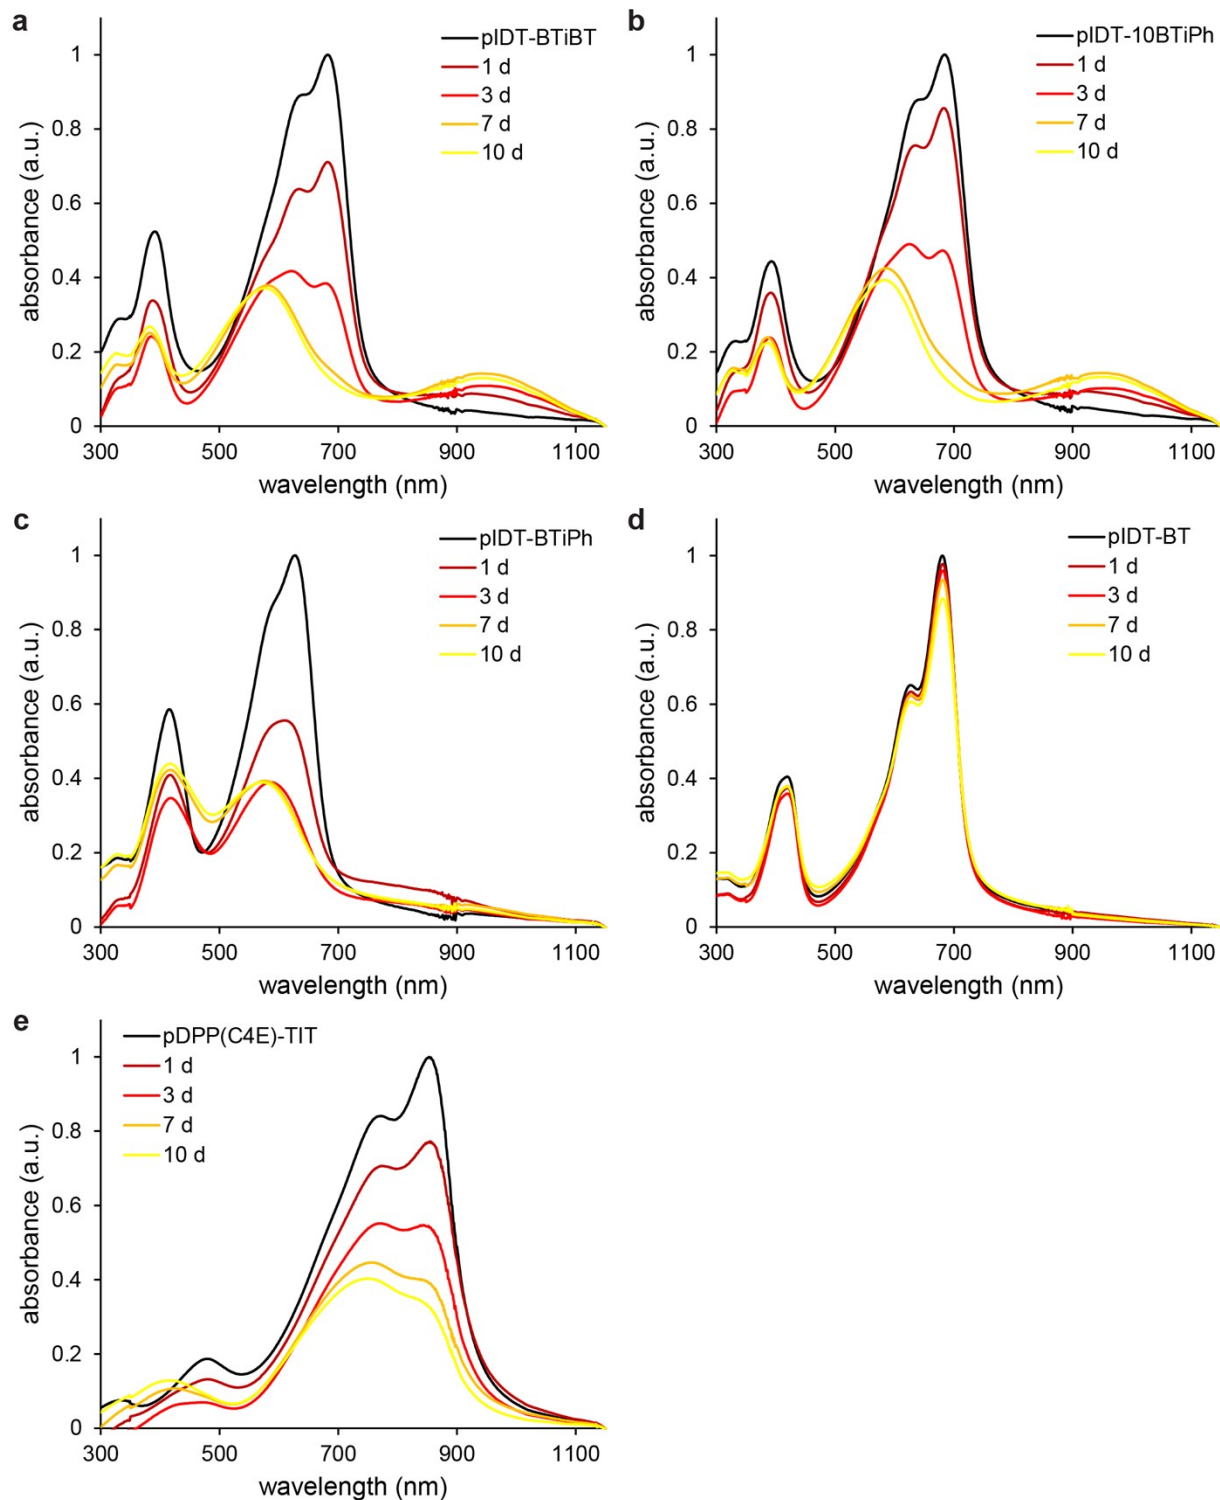

**Figure S45.** UV-vis spectra for (a) pIDT-BTiBT, (b) pIDT-10BTiPh (c) pIDT-BTiPh, (d) pIDT-BT, and (e) pDPP(C4E)-TIT as annealed thin films on PDMS degraded over time by submerging in 0.5 M TFA aqueous solution at 70 °C.

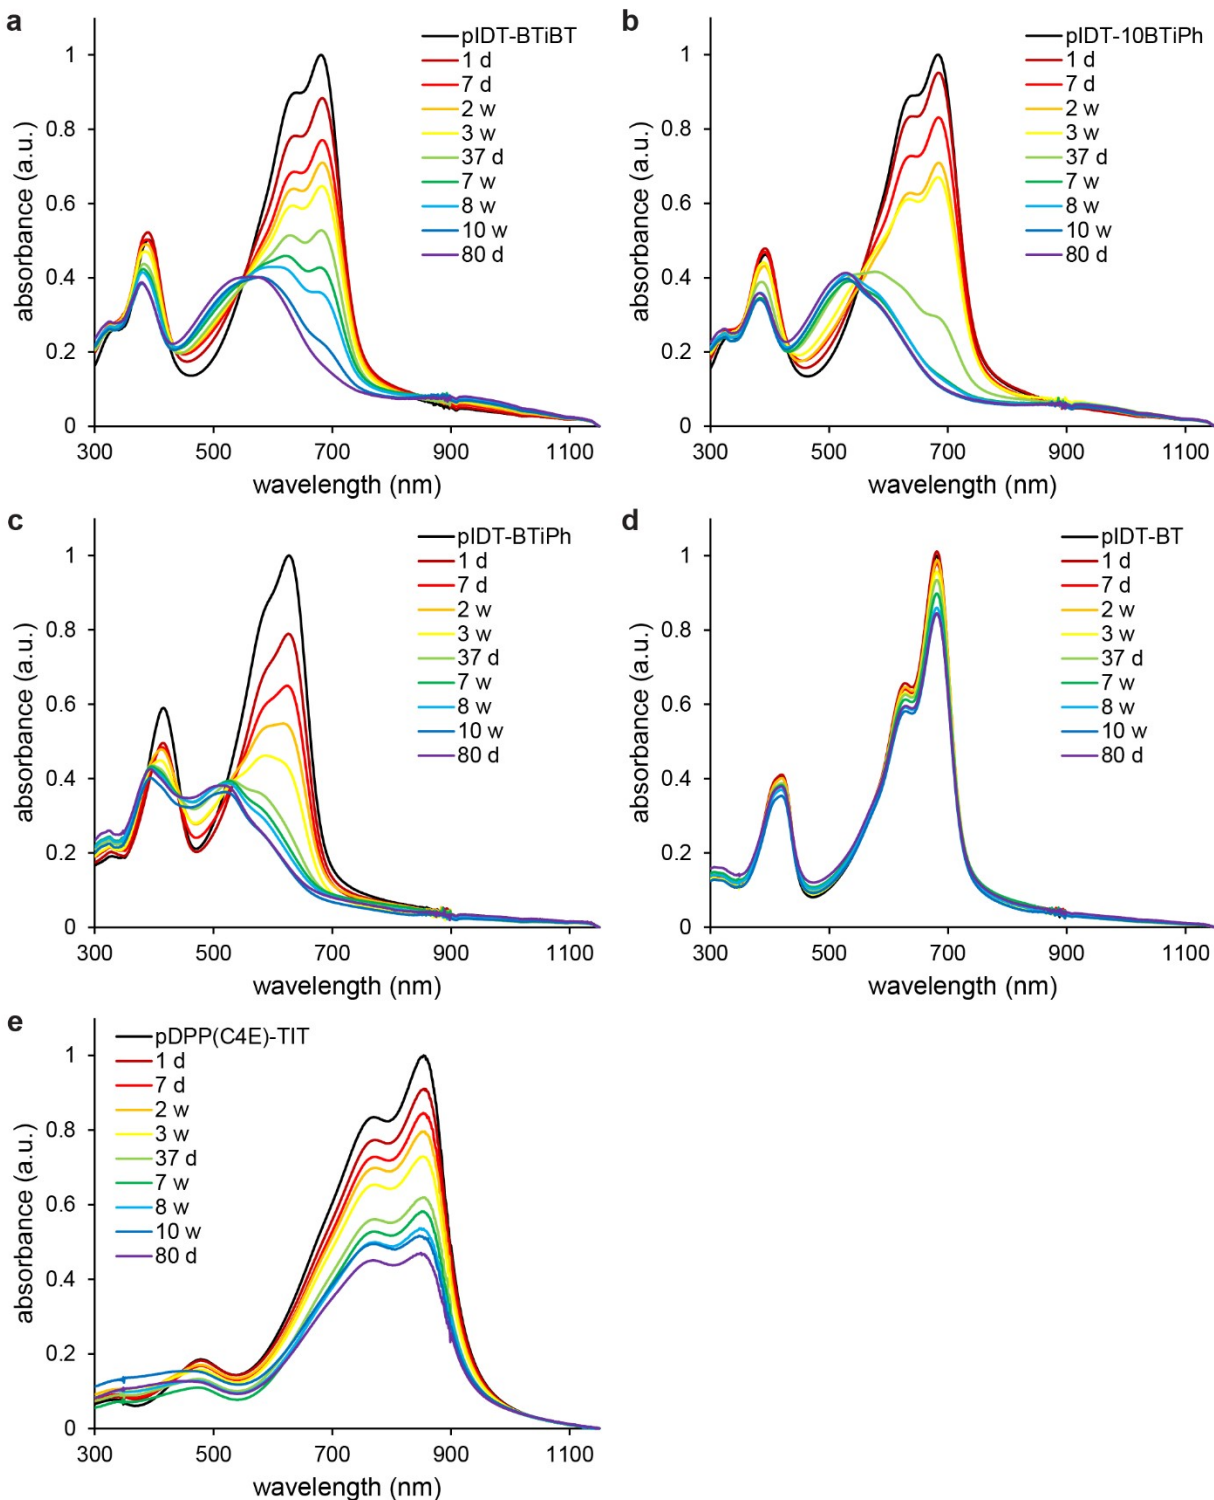

**Figure S46.** UV-vis spectra for (a) pIDT-BTiBT, (b) pIDT-10BTiPh (c) pIDT-BTiPh, (d) pIDT-BT, and (e) pDPP(C4E)-TIT as annealed thin films on PDMS degraded over time by submerging in 0.1 M HCl aqueous solution at 70 °C.

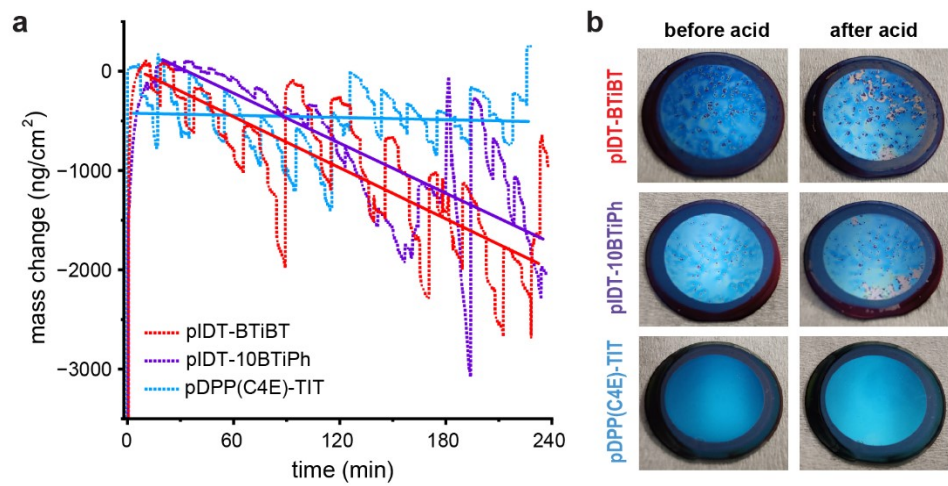

**Figure S47.** (a) Mass changes of thin films monitored by quartz crystal microbalance (QCM) for 0.1 M HCl at 65 °C. The solid lines display the linear fit. (b) Images of the measured polymers before and after flow of 0.1 M HCl at 65 °C.

## References

- (1) Jaguar: A high-performance quantum chemistry software program with strengths in life and materials sciences - Bochevarov - 2013 - International Journal of Quantum Chemistry - Wiley Online Library. <https://onlinelibrary.wiley.com/doi/10.1002/qua.24481> (accessed 2023-04-21).
- (2) Wadsworth, A.; Chen, H.; Thorley, K. J.; Cendra, C.; Nikolka, M.; Bristow, H.; Moser, M.; Salleo, A.; Anthopoulos, T. D.; Sirringhaus, H.; McCulloch, I. Modification of Indacenodithiophene-Based Polymers and Its Impact on Charge Carrier Mobility in Organic Thin-Film Transistors. *J. Am. Chem. Soc.* **2020**, 142 (2), 652–664. <https://doi.org/10.1021/jacs.9b09374>.
- (3) Chen, H.; Wadsworth, A.; Ma, C.; Nanni, A.; Zhang, W.; Nikolka, M.; Luci, A. M. T.; Perdigão, L. M. A.; Thorley, K. J.; Cendra, C.; Larson, B.; Rumbles, G.; Anthopoulos, T. D.; Salleo, A.; Costantini, G.; Sirringhaus, H.; McCulloch, I. The Effect of Ring Expansion in Thienobenzobenzothienodithiophene Polymers for Organic Field-Effect Transistors. *J. Am. Chem. Soc.* **2019**, 141 (47), 18806–18813. <https://doi.org/10.1021/jacs.9b09367>.
- (4) Zhao, B.; Pei, D.; Jiang, Y.; Wang, Z.; An, C.; Deng, Y.; Ma, Z.; Han, Y.; Geng, Y. Simultaneous Enhancement of Stretchability, Strength, and Mobility in Ultrahigh-Molecular-Weight Poly(Indacenodithiophene-*Co*-Benzothiadiazole). *Macromolecules* **2021**, 54 (21), 9896–9905. <https://doi.org/10.1021/acs.macromol.1c01513>.
- (5) Smilgies, D.-M. Scherrer Grain-Size Analysis Adapted to Grazing-Incidence Scattering with Area Detectors. *J Appl Cryst* **2009**, 42 (6), 1030–1034. <https://doi.org/10.1107/S0021889809040126>.
- (6) Rivnay, J.; Mannsfeld, S. C. B.; Miller, C. E.; Salleo, A.; Toney, M. F. Quantitative Determination of Organic Semiconductor Microstructure from the Molecular to Device Scale. *Chem. Rev.* **2012**, 112 (10), 5488–5519. <https://doi.org/10.1021/cr3001109>.
